# Supplementary material for: Plant and insect herbivore community variation across the Paleocene–Eocene boundary in the Hanna Basin, southeastern Wyoming
Source: PeerJ journal article supplement (doi:10.7717/peerj.7798), 2019-10-15

| MORPHOTYPE                                                                                                                                                                                                                                   | NAME                                  |                             | <i>Alnus sp.</i>                                        |
|----------------------------------------------------------------------------------------------------------------------------------------------------------------------------------------------------------------------------------------------|---------------------------------------|-----------------------------|---------------------------------------------------------|
| <b>GENERAL</b>                                                                                                                                                                                                                               | MAJOR GROUP                           | DIC                         | INFERED FAMILY <u>Betulaceae</u> ORGAN TYPE <u>Leaf</u> |
| EXEMPLAR LOC.                                                                                                                                                                                                                                | <u>HB-1704</u>                        | EXEMPLAR                    | <u>EC1518A</u> OTHERS LOC. _____                        |
| <b>DIAGNOSTIC FEATURES OF MORPHOTYPE</b>                                                                                                                                                                                                     |                                       |                             |                                                         |
| <p><u>The teeth distinguish Alnus sp. from other morphospecies. Unlike other toothed specimens found within the basin, Alnus sp. has two orders of teeth. Also, the spacing of the teeth is irregular with approximately 4 teeth/cm.</u></p> |                                       |                             |                                                         |
| MQI: _____                                                                                                                                                                                                                                   |                                       |                             |                                                         |
| <b>LEAF ATTACHMENT, ORGANIZATION, SIZE, SHAPE AND PETIOLE FEATURES</b>                                                                                                                                                                       |                                       |                             |                                                         |
| LEAF ATTACHMENT:                                                                                                                                                                                                                             | <u>Not Preserved</u>                  | LEAFLET ORGANIZATION:       | <u>Not Preserved</u>                                    |
| LEAF ARRANGEMENT:                                                                                                                                                                                                                            | <u>Not Preserved</u>                  | LEAFLET ATTACHMENT:         | <u>np</u>                                               |
| LEAF ORGANIZATION:                                                                                                                                                                                                                           | <u>Not Preserved</u>                  | PETIOLE ATTACHMENT.:        | <u>Not Preserved</u>                                    |
| BLADE SIZE:                                                                                                                                                                                                                                  | <u>Microphyll</u>                     | PETIOLE BASE:               | <u>Not Preserved</u>                                    |
| BLADE SHAPE:                                                                                                                                                                                                                                 | <u>Ovate</u>                          | PETIOLE GLANDS.:            | <u>None</u>                                             |
| BLADE RATIO L:W:                                                                                                                                                                                                                             | <u>2:1</u>                            | PETIOLE X-SECTION:          | <u>Not Preserved</u>                                    |
| LOBATION:                                                                                                                                                                                                                                    | <u>Unlobed</u>                        | MARGIN TYPE                 | <u>Serrate</u>                                          |
| BASE ASYMMETRY:                                                                                                                                                                                                                              | <u>Symmetrical</u>                    | MEDIAL SYMMETRY:            | <u>Asymetrical</u>                                      |
| BASE SHAPE:                                                                                                                                                                                                                                  | <u>Not Preserved</u>                  | APEX SHAPE:                 | <u>Not preserved</u>                                    |
| BASE ANGLE:                                                                                                                                                                                                                                  | <u>Not Preserved</u>                  | APEX ANGLE:                 | <u>Not preserved</u>                                    |
|                                                                                                                                                                                                                                              |                                       | Special Margin Features:    | <u>Not Preserved</u>                                    |
|                                                                                                                                                                                                                                              |                                       | Terminal apex features:     | <u>Not Preserved</u>                                    |
| <b>PRIMARY &amp; SECONDARY VEIN FEATURES</b>                                                                                                                                                                                                 |                                       |                             |                                                         |
| PRIMARY VENATION:                                                                                                                                                                                                                            | <u>Pinnate</u>                        | NAKED BASAL VEINS:          | <u>Not Preserved</u>                                    |
| MAJOR 2° Framework:                                                                                                                                                                                                                          | <u>Craspedodromous</u>                | N° BASAL VEINS:             | <u>1</u> Interior 2° <u>Absent</u>                      |
| MAJOR 2° Attachment:                                                                                                                                                                                                                         | <u>Decurrent</u>                      | MINOR-2° Course:            | _____                                                   |
| MAJOR 2° SPACING:                                                                                                                                                                                                                            | <u>Irregular</u>                      | MAJOR 2° VEIN ANGLE:        | <u>Smoothly increasing toward base</u>                  |
|                                                                                                                                                                                                                                              |                                       | AGROPHIC VEINS:             | <u>Absent</u>                                           |
| INTER-2° proximal course:                                                                                                                                                                                                                    | _____                                 | INTER-2° VEIN LENGTH:       | _____                                                   |
| INTER-2° distal course:                                                                                                                                                                                                                      | _____                                 | INTER-2° FREQUENCY:         | _____                                                   |
| <b>TERTIARY VEIN FEATURES</b>                                                                                                                                                                                                                |                                       |                             |                                                         |
| INTERCOSTAL 3°:                                                                                                                                                                                                                              | <u>Opposite percurrent - straight</u> | PERIMARGINAL VEINS:         | <u>None</u>                                             |
| EPIMEDIAL 3°:                                                                                                                                                                                                                                | <u>Not preserved</u>                  | INTER-3° ANGLE TO 1°:       | <u>Acute to midvein</u>                                 |
| ADMEDIAL COURSE:                                                                                                                                                                                                                             | <u>Not preserved</u>                  | EXTERIOR 3° COURSE:         | <u>Not preserved</u>                                    |
| EXMEDIAL COURSE:                                                                                                                                                                                                                             | <u>not preserved</u>                  | INTERCOSTAL 3° VARIABILITY: | <u>Consistent</u>                                       |
| <b>FOURTH &amp; HIGHER ORDER VEIN FEATURES</b>                                                                                                                                                                                               |                                       |                             |                                                         |
| 4° VEIN FABRIC:                                                                                                                                                                                                                              | <u>Opposite percurrent</u>            | VEINLETS -F/E/V/s:          | <u>Not Preserved</u>                                    |
| 5° VEIN FABRIC:                                                                                                                                                                                                                              | <u>Regular reticulate</u>             | TYPE OF F.E.V. BRANCHING:   | <u>n.p</u>                                              |
| MARGINAL VENATION:                                                                                                                                                                                                                           | <u>Not Preserved</u>                  | F.E.V.s TERMINATIONS:       | <u>Not Preserved</u>                                    |
| AREOLATION:                                                                                                                                                                                                                                  | <u>Well developed</u>                 | LEAF RANK:                  | _____                                                   |
| <b>TOOTH FEATURES</b>                                                                                                                                                                                                                        |                                       |                             |                                                         |
| ORDERS OF TEETH:                                                                                                                                                                                                                             | <u>2</u>                              | No TEETH/cm:                | <u>4</u>                                                |
| TOOTH SHAPE:                                                                                                                                                                                                                                 | <u>cv/st</u>                          | TEETH GLANDULARITY:         | <u>Non-specific glandular</u>                           |
| PRINCIPAL VEIN:                                                                                                                                                                                                                              | <u>Present</u>                        | TOOTH SPACING:              | <u>Irregular</u>                                        |
|                                                                                                                                                                                                                                              |                                       | SINUS SHAPE:                | <u>Rounded</u>                                          |
| ACCESSORY VEIN COURSE:                                                                                                                                                                                                                       | _____                                 | PRINCIPAL VEIN TERM.:       | <u>Marginal, at apex</u>                                |
| <b>NOTES</b>                                                                                                                                                                                                                                 |                                       |                             |                                                         |
| This morphosheet was filled out using specimen: 1704_13-A and a previously collected specimen EC1518A _____                                                                                                                                  |                                       |                             |                                                         |



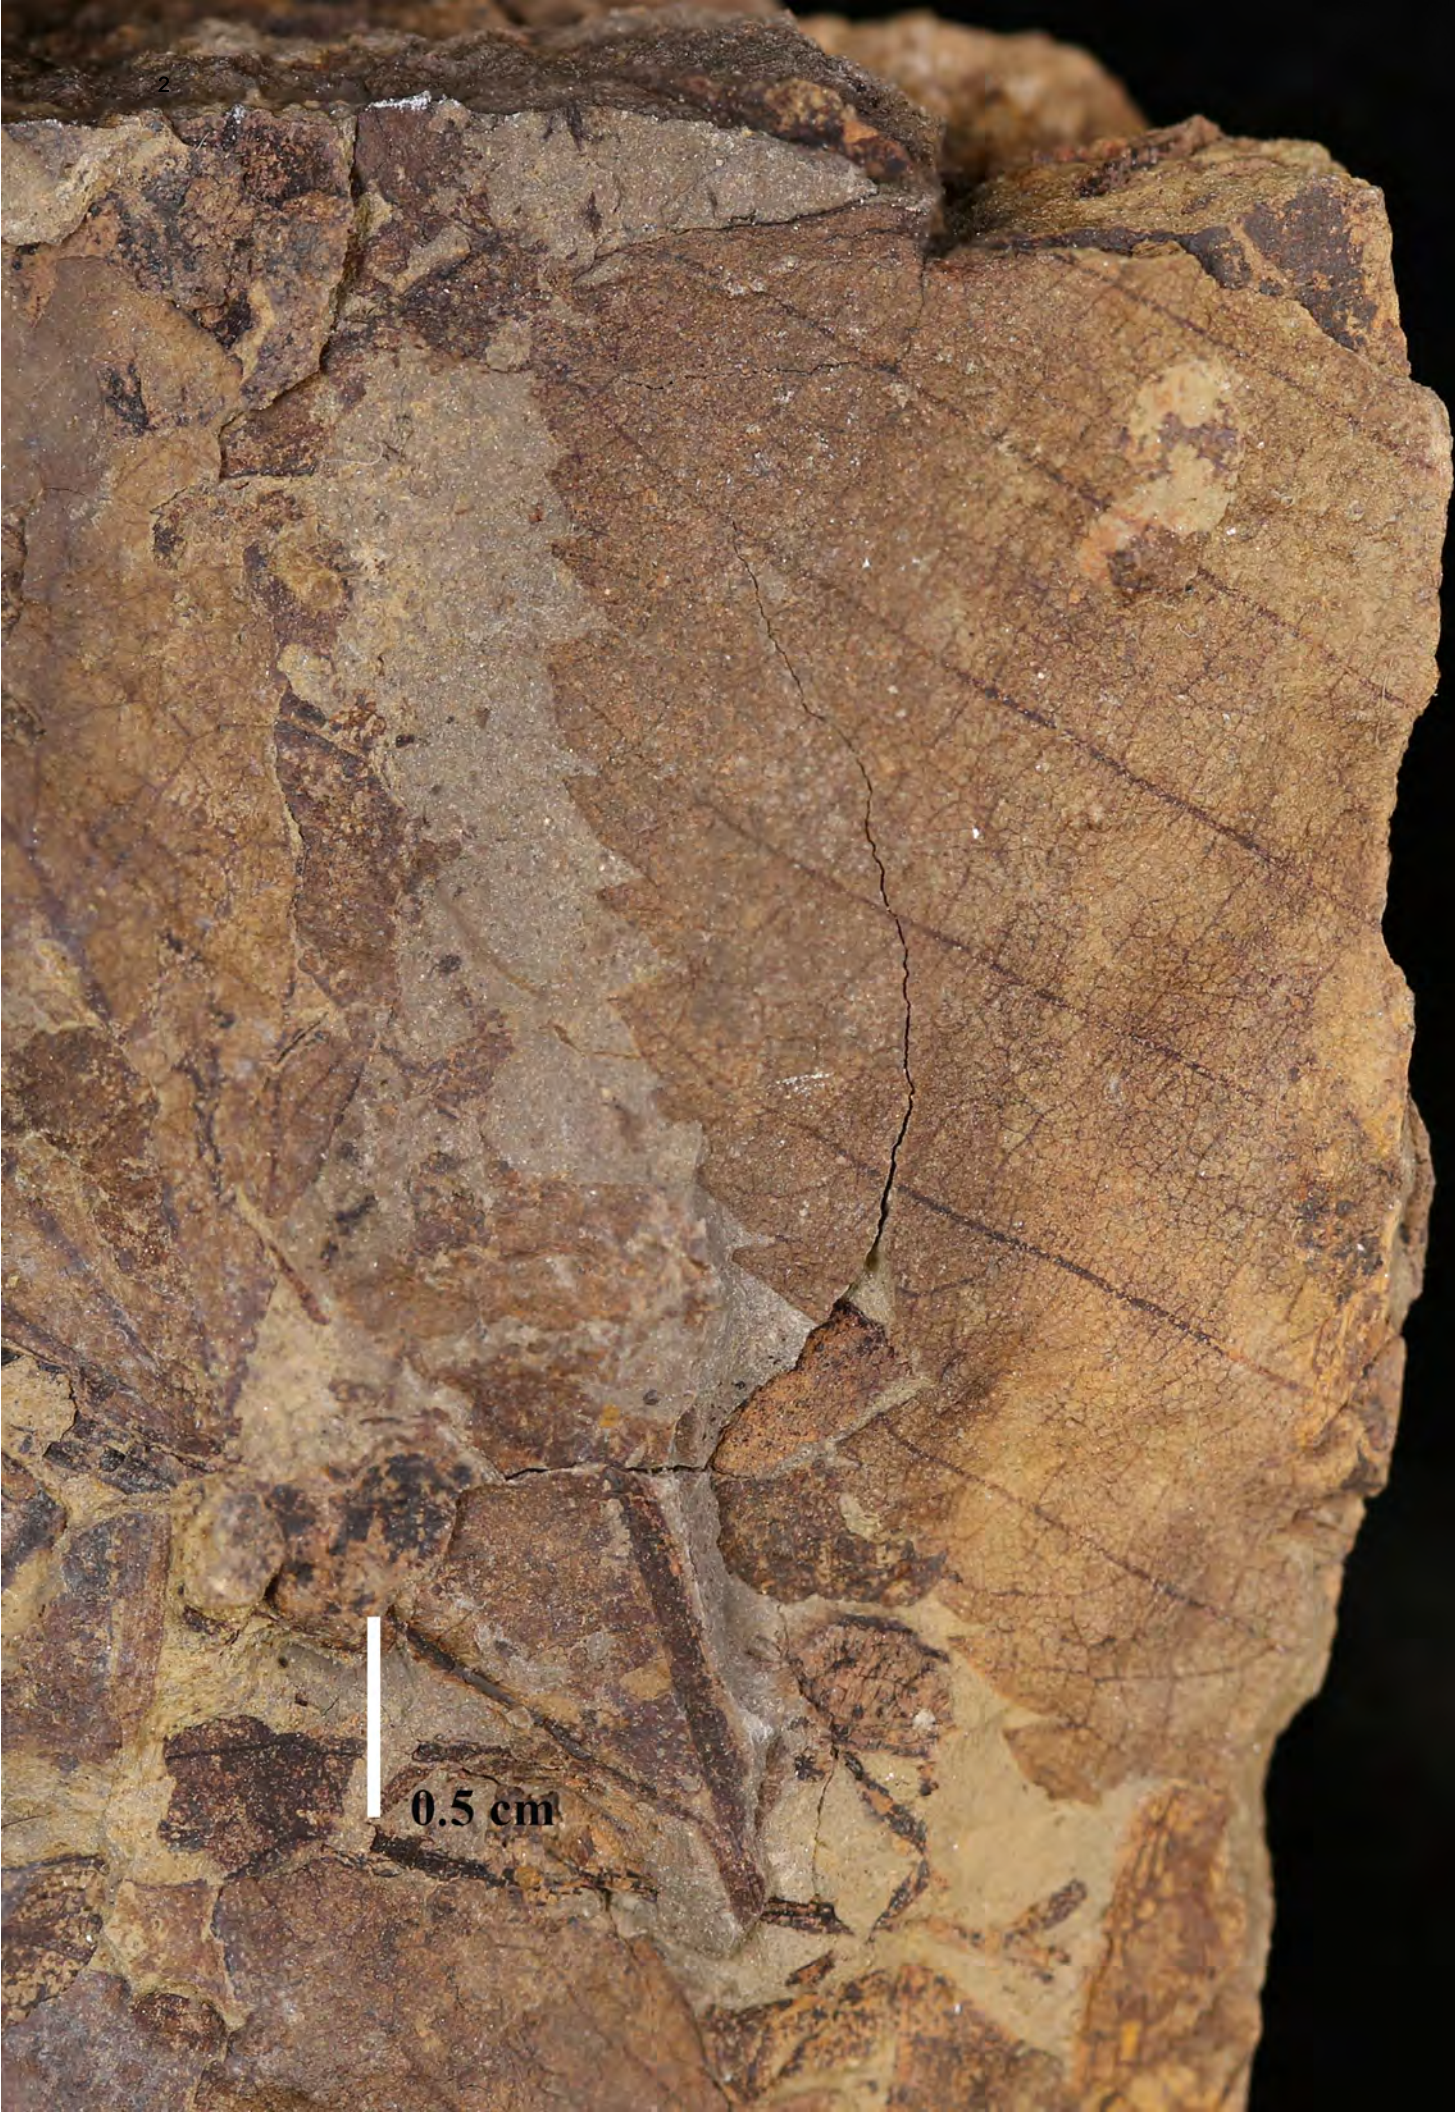

0.5 cm



| MORPHOTYPE                                                                                                                                 |                                 |                             |                                        | NAME                     | <i>Averrhoites affinis</i> |
|--------------------------------------------------------------------------------------------------------------------------------------------|---------------------------------|-----------------------------|----------------------------------------|--------------------------|----------------------------|
| <b>GENERAL</b>                                                                                                                             | MAJOR GROUP                     | <u>DIC</u>                  | INFERED FAMILY                         | ORGAN TYPE               |                            |
| EXEMPLAR LOC.                                                                                                                              | <u>HB</u>                       | EXEMPLAR                    | <u>1701-79, 1706-39</u>                | OTHERS LOC.              |                            |
| <b>DIAGNOSTIC FEATURES OF MORPHOTYPE</b>                                                                                                   |                                 |                             |                                        |                          |                            |
| <u>Base of midvein thick and decreases in thickness as you move towards the apex.</u>                                                      |                                 |                             |                                        |                          |                            |
| <u>Midvein at base is 2x thicker than at the apex. The base is also asymmetrical intersecondary veins and the preservation is lacking.</u> |                                 |                             |                                        |                          |                            |
| MQI: _____                                                                                                                                 |                                 |                             |                                        |                          |                            |
| <b>LEAF ATTACHMENT, ORGANIZATION, SIZE, SHAPE AND PETIOLE FEATURES</b>                                                                     |                                 |                             |                                        |                          |                            |
| LEAF ATTACHMENT:                                                                                                                           | <u>Petiolate</u>                | LEAFLET ORGANIZATION:       | <u>Not Preserved</u>                   |                          |                            |
| LEAF ARRANGEMENT:                                                                                                                          | <u>Not Preserved</u>            | LEAFLET ATTACHMENT:         | <u>np</u>                              |                          |                            |
| LEAF ORGANIZATION:                                                                                                                         | <u>Not Preserved</u>            | PETIOLE ATTACHMENT.:        | <u>Not Preserved</u>                   |                          |                            |
| BLADE SIZE:                                                                                                                                | <u>Microphyll-Mesophyll</u>     | PETIOLE BASE:               | <u>Not Preserved</u>                   |                          |                            |
| BLADE SHAPE:                                                                                                                               | <u>Elliptic</u>                 | PETIOLE GLANDS.:            | <u>NP</u>                              |                          |                            |
| BLADE RATIO L:W:                                                                                                                           | <u>2:1</u>                      | PETIOLE X-SECTION:          | <u>NP</u>                              |                          |                            |
| LOBATION:                                                                                                                                  | <u>Unlobed</u>                  | MARGIN TYPE                 | <u>Untoothed</u>                       |                          |                            |
| BASE ASYMMETRY:                                                                                                                            | <u>Basal width asymmetrical</u> | MEDIAL SYMMETRY:            | <u>Asymetrical</u>                     |                          |                            |
| BASE SHAPE:                                                                                                                                | <u>Convex</u>                   | APEX SHAPE:                 | <u>Rounded</u>                         | Special Margin Features: | <u>Not Preserved</u>       |
| BASE ANGLE:                                                                                                                                | <u>Acute</u>                    | APEX ANGLE:                 | <u>Obtuse</u>                          | Terminal apex features:  | <u>Not Preserved</u>       |
| <b>PRIMARY &amp; SECONDARY VEIN FEATURES</b>                                                                                               |                                 |                             |                                        |                          |                            |
| PRIMARY VENATION:                                                                                                                          | <u>Pinnate</u>                  | NAKED BASAL VEINS:          | <u>Absent</u>                          |                          |                            |
| MAJOR 2° Framework:                                                                                                                        | <u>Simple brochidodromous</u>   | N° BASAL VEINS:             | <u>1</u>                               | Interior 2°:             | <u>Absent</u>              |
| MAJOR 2° Attachment:                                                                                                                       | <u>Decurrent</u>                | MINOR-2° Course:            | <u>Semicraspedodromous</u>             |                          |                            |
| MAJOR 2° SPACING:                                                                                                                          | <u>Irregular</u>                | MAJOR 2° VEIN ANGLE:        | <u>Abruptly increasing toward base</u> |                          |                            |
| INTER-2° proximal course:                                                                                                                  |                                 | AGROPHIC VEINS:             | <u>Absent</u>                          |                          |                            |
| INTER-2° distal course:                                                                                                                    |                                 | INTER-2° VEIN LENGTH:       |                                        |                          |                            |
|                                                                                                                                            |                                 | INTER-2° FREQUENCY:         |                                        |                          |                            |
| <b>TERTIARY VEIN FEATURES</b>                                                                                                              |                                 |                             |                                        |                          |                            |
| INTERCOSTAL 3°:                                                                                                                            | <u>Alternate percurrent</u>     | PERIMARGINAL VEINS:         | <u>None</u>                            |                          |                            |
| EPIMEDIAL 3°:                                                                                                                              | <u>Not preserved</u>            | INTER-3° ANGLE TO 1°:       | <u>Not Preserved</u>                   |                          |                            |
| ADMEDIAL COURSE:                                                                                                                           | <u>Not preserved</u>            | EXTERIOR 3° COURSE:         | <u>Not Preserved</u>                   |                          |                            |
| EXMEDIAL COURSE:                                                                                                                           | <u>Not Preserved</u>            | INTERCOSTAL 3° VARIABILITY: | <u>Not Preserved</u>                   |                          |                            |
| <b>FOURTH &amp; HIGHER ORDER VEIN FEATURES</b>                                                                                             |                                 |                             |                                        |                          |                            |
| 4° VEIN FABRIC:                                                                                                                            | <u>Not Preserved</u>            | VEINLETS -F/E/V/s:          | <u>Not Preserved</u>                   |                          |                            |
| 5° VEIN FABRIC:                                                                                                                            | <u>Not Preserved</u>            | TYPE OF F.E.V. BRANCHING:   | <u>n.p</u>                             |                          |                            |
| MARGINAL VENATION:                                                                                                                         | <u>Not Preserved</u>            | F.E.V.s TERMINATIONS:       | <u>Not Preserved</u>                   |                          |                            |
| AREOLATION:                                                                                                                                | <u>Not Preserved</u>            | LEAF RANK:                  |                                        |                          |                            |
| <b>TOOTH FEATURES</b>                                                                                                                      |                                 |                             |                                        |                          |                            |
| ORDERS OF TEETH:                                                                                                                           |                                 | No TEETH/cm:                |                                        | TEETH GLANDULARITY:      |                            |
| TOOTH SHAPE:                                                                                                                               |                                 | TOOTH SPACING:              |                                        |                          |                            |
| PRINCIPAL VEIN:                                                                                                                            |                                 | SINUS SHAPE:                |                                        |                          |                            |
| ACCESSORY VEIN COURSE:                                                                                                                     |                                 | PRINCIPAL VEIN TERM.:       |                                        |                          |                            |
| <b>NOTES</b>                                                                                                                               |                                 |                             |                                        |                          |                            |
| Specimens used to make sheet: 1701-79 and 1706-39                                                                                          |                                 |                             |                                        |                          |                            |



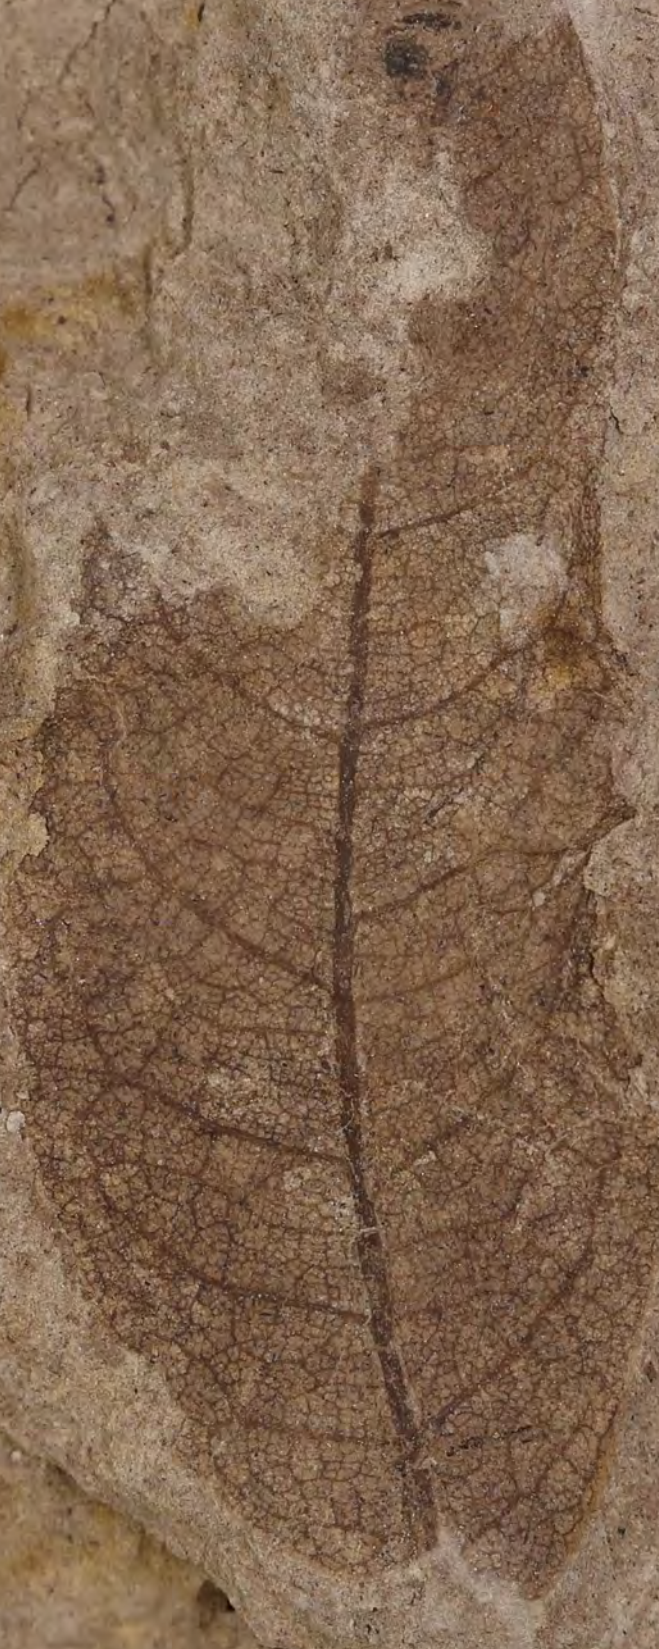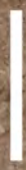

0.5 cm



| MORPHOTYPE                                                                                                                                                                                                                                              | NAME                     |                             |                                 | <i>Fagopsiphyllum groenlandicum</i>    |
|---------------------------------------------------------------------------------------------------------------------------------------------------------------------------------------------------------------------------------------------------------|--------------------------|-----------------------------|---------------------------------|----------------------------------------|
| <b>GENERAL</b>                                                                                                                                                                                                                                          | MAJOR GROUP              | DIC                         | INFERED FAMILY                  | ORGAN TYPE                             |
| EXEMPLAR LOC.                                                                                                                                                                                                                                           | Hanna Basin, WY          | EXEMPLAR                    | 1710-20                         | OTHERS LOC.                            |
| <b>DIAGNOSTIC FEATURES OF MORPHOTYPE</b>                                                                                                                                                                                                                |                          |                             |                                 |                                        |
| <p style="color: blue; text-align: center;">Large crenate teeth with thick 2° vein that terminates in the apex of the tooth. Only one order of teeth and 1 tooth/cm. This distinguishes it apart from other crenate toothed leaves from this basin.</p> |                          |                             |                                 |                                        |
|                                                                                                                                                                                                                                                         |                          |                             |                                 | MQI: _____                             |
| <b>LEAF ATTACHMENT, ORGANIZATION, SIZE, SHAPE AND PETIOLE FEATURES</b>                                                                                                                                                                                  |                          |                             |                                 |                                        |
| LEAF ATTACHMENT:                                                                                                                                                                                                                                        | Not Preserved            | LEAFLET ORGANIZATION:       | Not Preserved                   |                                        |
| LEAF ARRANGEMENT:                                                                                                                                                                                                                                       | Not Preserved            | LEAFLET ATTACHMENT:         | np                              |                                        |
| LEAF ORGANIZATION:                                                                                                                                                                                                                                      | Not Preserved            | PETIOLE ATTACHMENT.:        | Not Preserved                   |                                        |
| BLADE SIZE:                                                                                                                                                                                                                                             | Microphyll-Notophyllum   | PETIOLE BASE:               | Not Preserved                   |                                        |
| BLADE SHAPE:                                                                                                                                                                                                                                            | Ovate                    | PETIOLE GLANDS.:            | Not Preserved                   |                                        |
| BLADE RATIO L:W:                                                                                                                                                                                                                                        | 1.5:1                    | PETIOLE X-SECTION:          | Not Preserved                   |                                        |
| LOBATION:                                                                                                                                                                                                                                               | Unlobed                  | MARGIN TYPE                 | Crenate                         |                                        |
| BASE ASYMMETRY:                                                                                                                                                                                                                                         | Not Preserved            | MEDIAL SYMMETRY:            | Not Preserved                   |                                        |
| BASE SHAPE:                                                                                                                                                                                                                                             | Not Preserved            | APEX SHAPE:                 | Not preserved                   | Special Margin Features: Not Preserved |
| BASE ANGLE:                                                                                                                                                                                                                                             | Not Preserved            | APEX ANGLE:                 | Not preserved                   | Terminal apex features: Not Preserved  |
| <b>PRIMARY &amp; SECONDARY VEIN FEATURES</b>                                                                                                                                                                                                            |                          |                             |                                 |                                        |
| PRIMARY VENATION:                                                                                                                                                                                                                                       | Pinnate                  | NAKED BASAL VEINS:          | Not Preserved                   |                                        |
| MAJOR 2° Framework:                                                                                                                                                                                                                                     | Craspedodromous          | N° BASAL VEINS:             | 1                               | Interior 2°: Absent                    |
| MAJOR 2° Attachment:                                                                                                                                                                                                                                    | Decurrent                | MINOR-2° Course:            |                                 |                                        |
| MAJOR 2° SPACING:                                                                                                                                                                                                                                       | Regular                  | MAJOR 2° VEIN ANGLE:        | Smoothly increasing toward base |                                        |
|                                                                                                                                                                                                                                                         |                          | AGROPHIC VEINS:             | Absent                          |                                        |
| INTER-2° proximal course:                                                                                                                                                                                                                               |                          | INTER-2° VEIN LENGTH:       |                                 |                                        |
| INTER-2° distal course:                                                                                                                                                                                                                                 |                          | INTER-2° FREQUENCY:         |                                 |                                        |
| <b>TERTIARY VEIN FEATURES</b>                                                                                                                                                                                                                           |                          |                             |                                 |                                        |
| INTERCOSTAL 3°:                                                                                                                                                                                                                                         | Mixed opp/alt percurrent | PERIMARGINAL VEINS:         | None                            |                                        |
| EPIMEDIAL 3°:                                                                                                                                                                                                                                           | Not preserved            | INTER-3° ANGLE TO 1°:       | Acute to midvein                |                                        |
| ADMEDIAL COURSE:                                                                                                                                                                                                                                        | Not Preserved            | EXTERIOR 3° COURSE:         | Not Preserved                   |                                        |
| EXMEDIAL COURSE:                                                                                                                                                                                                                                        | Not Preserved            | INTERCOSTAL 3° VARIABILITY: | Not Preserved                   |                                        |
| <b>FOURTH &amp; HIGHER ORDER VEIN FEATURES</b>                                                                                                                                                                                                          |                          |                             |                                 |                                        |
| 4° VEIN FABRIC:                                                                                                                                                                                                                                         | Not Preserved            | VEINLETS -F/E/V/s:          | Not Preserved                   |                                        |
| 5° VEIN FABRIC:                                                                                                                                                                                                                                         | Not Preserved            | TYPE OF F.E.V. BRANCHING:   | n.p                             |                                        |
| MARGINAL VENATION:                                                                                                                                                                                                                                      | Not Preserved            | F.E.V.s TERMINATIONS:       | Not Preserved                   |                                        |
| AREOLATION:                                                                                                                                                                                                                                             | Not Preserved            | LEAF RANK:                  |                                 |                                        |
| <b>TOOTH FEATURES</b>                                                                                                                                                                                                                                   |                          |                             |                                 |                                        |
| ORDERS OF TEETH:                                                                                                                                                                                                                                        | 1                        | No TEETH/cm:                | 1                               | TEETH GLANDULARITY:                    |
| TOOTH SHAPE:                                                                                                                                                                                                                                            | rt/rt                    | TOOTH SPACING:              | Regular                         | Not Preserved                          |
| PRINCIPAL VEIN:                                                                                                                                                                                                                                         | Present                  | SINUS SHAPE:                | Rounded                         |                                        |
| ACCESSORY VEIN COURSE:                                                                                                                                                                                                                                  | Not Preserved            | PRINCIPAL VEIN TERM.:       | Marginal, at apex               |                                        |
| <b>NOTES</b>                                                                                                                                                                                                                                            |                          |                             |                                 |                                        |
| Morphotype sheet completed with specimens: 1710-20 and 1703-7                                                                                                                                                                                           |                          |                             |                                 |                                        |



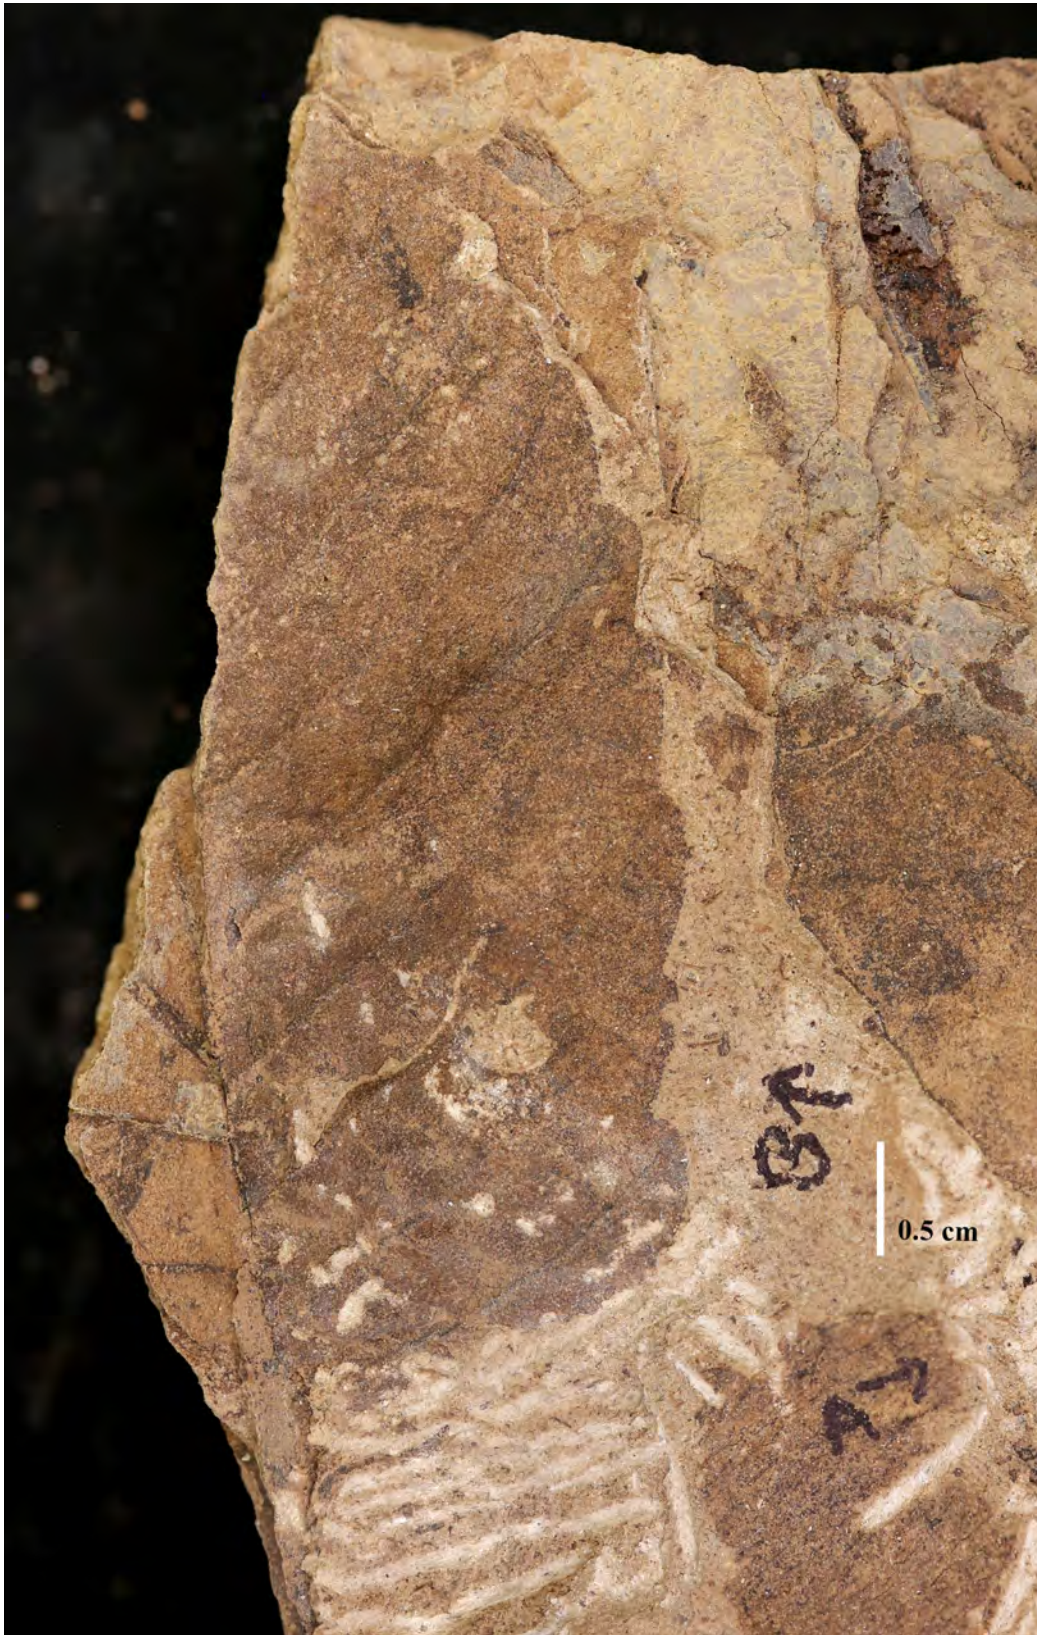



| MORPHOTYPE                                                                     | HB171                           | NAME                        |                                 |                          |               |
|--------------------------------------------------------------------------------|---------------------------------|-----------------------------|---------------------------------|--------------------------|---------------|
| <b>GENERAL</b>                                                                 | MAJOR GROUP                     | DIC                         | INFERED FAMILY                  | ORGAN TYPE               | Leaf          |
| EXEMPLAR LOC.                                                                  | Hanna Basin 1706                | EXEMPLAR                    | 1706-42                         | OTHERS LOC.              |               |
| <b>DIAGNOSTIC FEATURES OF MORPHOTYPE</b>                                       |                                 |                             |                                 |                          |               |
| Thickened margin but not enough preserved to claim a perimarginal vein.        |                                 |                             |                                 |                          |               |
| Also the base is wide obtuse and concave, and the intercostal 3 are chevroned. |                                 |                             |                                 |                          |               |
|                                                                                |                                 |                             |                                 |                          | MQI: _____    |
| <b>LEAF ATTACHMENT, ORGANIZATION, SIZE, SHAPE AND PETIOLE FEATURES</b>         |                                 |                             |                                 |                          |               |
| LEAF ATTACHMENT:                                                               | Not Preserved                   | LEAFLET ORGANIZATION:       | Not Preserved                   |                          |               |
| LEAF ARRANGEMENT:                                                              | Not Preserved                   | LEAFLET ATTACHMENT:         | np                              |                          |               |
| LEAF ORGANIZATION:                                                             | Not Preserved                   | PETIOLE ATTACHMENT.:        | Not Preserved                   |                          |               |
| BLADE SIZE:                                                                    | Notophyll                       | PETIOLE BASE:               | Not Preserved                   |                          |               |
| BLADE SHAPE:                                                                   | Ovate                           | PETIOLE GLANDS.:            | Not Preserved                   |                          |               |
| BLADE RATIO L:W:                                                               | 1:1                             | PETIOLE X-SECTION:          | Not Preserved                   |                          |               |
| LOBATION:                                                                      | Not Preserved                   | MARGIN TYPE                 | Untoothed                       |                          |               |
| BASE ASYMMETRY:                                                                | Symmetrical                     | MEDIAL SYMMETRY:            | Symmetrical                     |                          |               |
| BASE SHAPE:                                                                    | Concave                         | APEX SHAPE:                 | Not preserved                   | Special Margin Features: | Not Preserved |
| BASE ANGLE:                                                                    | Wide obtuse                     | APEX ANGLE:                 | Not preserved                   | Terminal apex features:  | Not Preserved |
| <b>PRIMARY &amp; SECONDARY VEIN FEATURES</b>                                   |                                 |                             |                                 |                          |               |
| PRIMARY VENATION:                                                              | Pinnate                         | NAKED BASAL VEINS:          | Absent                          |                          |               |
| MAJOR 2° Framework:                                                            | Simple brochidodromous          | N° BASAL VEINS:             | 1                               | Interior 2°:             | Absent        |
| MAJOR 2° Attachment:                                                           | Decurrent                       | MINOR-2° Course:            | Not Preserved                   |                          |               |
| MAJOR 2° SPACING:                                                              | Irregular                       | MAJOR 2° VEIN ANGLE:        | Smoothly increasing toward base |                          |               |
| INTER-2° proximal course:                                                      |                                 | AGROPHIC VEINS:             | Absent                          |                          |               |
| INTER-2° distal course:                                                        |                                 | INTER-2° VEIN LENGTH:       |                                 |                          |               |
|                                                                                |                                 | INTER-2° FREQUENCY:         |                                 |                          |               |
| <b>TERTIARY VEIN FEATURES</b>                                                  |                                 |                             |                                 |                          |               |
| INTERCOSTAL 3°:                                                                | Opposite percurrent - chevroned | PERIMARGINAL VEINS:         | Not Preserved                   |                          |               |
| EPIMEDIAL 3°:                                                                  | Not preserved                   | INTER-3° ANGLE TO 1°:       | Not Preserved                   |                          |               |
| ADMEDIAL COURSE:                                                               | Not Preserved                   | EXTERIOR 3° COURSE:         | Not Preserved                   |                          |               |
| EXMEDIAL COURSE:                                                               | Not Preserved                   | INTERCOSTAL 3° VARIABILITY: | Not Preserved                   |                          |               |
| <b>FOURTH &amp; HIGHER ORDER VEIN FEATURES</b>                                 |                                 |                             |                                 |                          |               |
| 4° VEIN FABRIC:                                                                | Not Preserved                   | VEINLETS -F/E/V/s:          | Not Preserved                   |                          |               |
| 5° VEIN FABRIC:                                                                | Not Preserved                   | TYPE OF F.E.V. BRANCHING:   | n.p                             |                          |               |
| MARGINAL VENATION:                                                             | Not Preserved                   | F.E.V.s TERMINATIONS:       | Not Preserved                   |                          |               |
| AREOLATION:                                                                    | Not Preserved                   | LEAF RANK:                  |                                 |                          |               |
| <b>TOOTH FEATURES</b>                                                          |                                 |                             |                                 |                          |               |
| ORDERS OF TEETH:                                                               |                                 | No TEETH/cm:                |                                 | TEETH GLANDULARITY:      |               |
| TOOTH SHAPE:                                                                   |                                 | TOOTH SPACING:              |                                 |                          |               |
| PRINCIPAL VEIN:                                                                |                                 | SINUS SHAPE:                |                                 |                          |               |
| ACCESSORY VEIN COURSE:                                                         |                                 | PRINCIPAL VEIN TERM.:       |                                 |                          |               |
| <b>NOTES</b>                                                                   |                                 |                             |                                 |                          |               |
| Specimen 1706_42 was used to make this morphosheet                             |                                 |                             |                                 |                          |               |



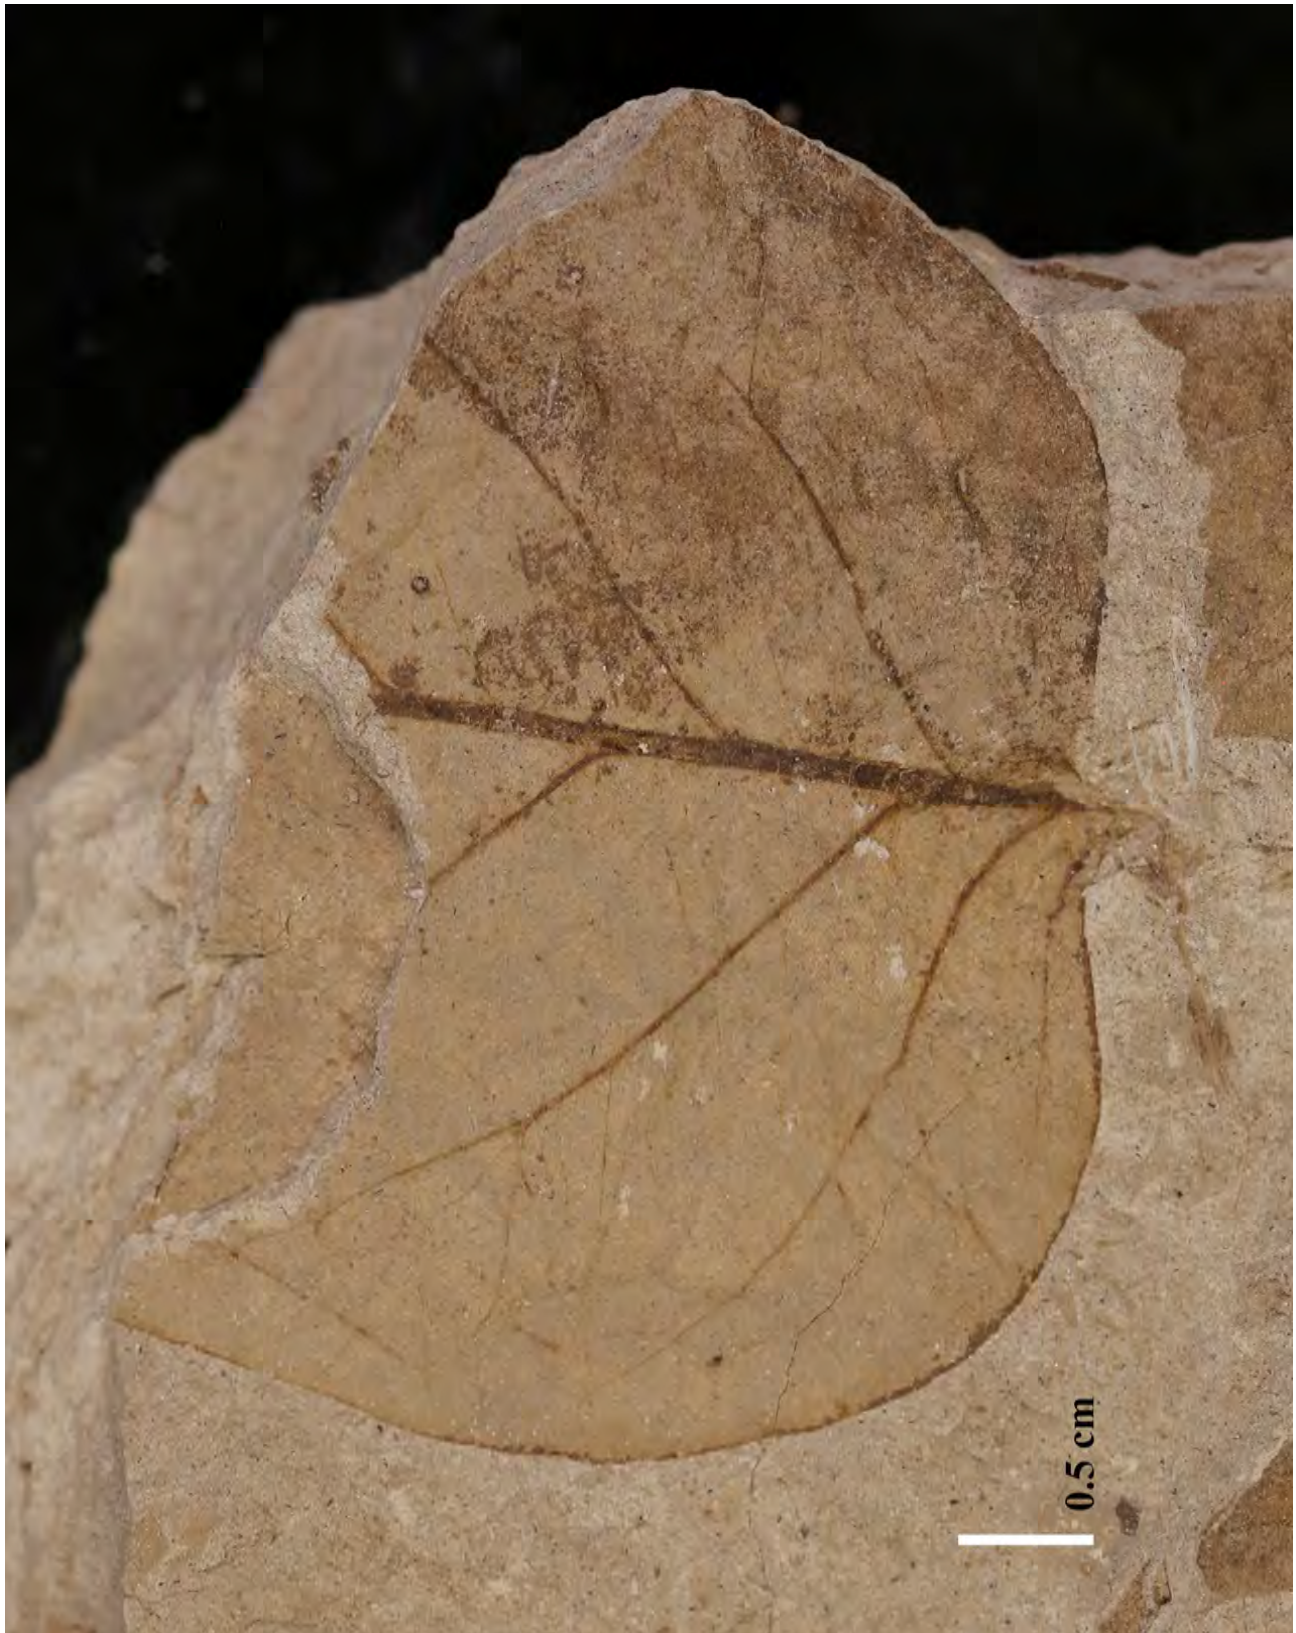



| MORPHOTYPE                                                                                                                            | HB172                                                       | NAME                                          |                        |
|---------------------------------------------------------------------------------------------------------------------------------------|-------------------------------------------------------------|-----------------------------------------------|------------------------|
| <b>GENERAL</b>                                                                                                                        | MAJOR GROUP <u>DIC</u>                                      | INFERED FAMILY _____                          | ORGAN TYPE <u>Leaf</u> |
| EXEMPLAR LOC. <u>Hanna Basin WY</u>                                                                                                   | EXEMPLAR <u>1701-1</u>                                      | OTHERS LOC. _____                             |                        |
| <b>DIAGNOSTIC FEATURES OF MORPHOTYPE</b>                                                                                              |                                                             |                                               |                        |
| <u>Cordate base.</u>                                                                                                                  |                                                             |                                               |                        |
| <u>Thickened midvein at base and decreases towards apex. Base is 3x thicker than apex.</u>                                            |                                                             |                                               |                        |
| <u>Higher order veins are not preserved. Second degree veins are very distinct with a sharp increase toward the base of the leaf.</u> |                                                             |                                               |                        |
| MQI: _____                                                                                                                            |                                                             |                                               |                        |
| <b>LEAF ATTACHMENT, ORGANIZATION, SIZE, SHAPE AND PETIOLE FEATURES</b>                                                                |                                                             |                                               |                        |
| LEAF ATTACHMENT: <u>Petiolate</u>                                                                                                     | LEAFLET ORGANIZATION: <u>Not Preserved</u>                  |                                               |                        |
| LEAF ARRANGEMENT: <u>Not Preserved</u>                                                                                                | LEAFLET ATTACHMENT: <u>np</u>                               |                                               |                        |
| LEAF ORGANIZATION: <u>Not Preserved</u>                                                                                               | PETIOLE ATTACHMENT.: <u>Not Preserved</u>                   |                                               |                        |
| BLADE SIZE: <u>Nanophyll-Notophyll</u>                                                                                                | PETIOLE BASE: <u>Not Preserved</u>                          |                                               |                        |
| BLADE SHAPE: <u>Oblong</u>                                                                                                            | PETIOLE GLANDS.: <u>NP</u>                                  |                                               |                        |
| BLADE RATIO L:W: <u>1.5:1</u>                                                                                                         | PETIOLE X-SECTION: <u>NP</u>                                |                                               |                        |
| LOBATION: <u>Unlobed</u>                                                                                                              | MARGIN TYPE: <u>Serrate</u>                                 |                                               |                        |
| BASE ASYMMETRY: <u>Symmetrical</u>                                                                                                    | MEDIAL SYMMETRY: <u>Symmetrical</u>                         |                                               |                        |
| BASE SHAPE: <u>Cordate</u>                                                                                                            | APEX SHAPE: <u>Not preserved</u>                            | Special Margin Features: <u>Not Preserved</u> |                        |
| BASE ANGLE: <u>Wide obtuse</u>                                                                                                        | APEX ANGLE: <u>Not preserved</u>                            | Terminal apex features: <u>Not Preserved</u>  |                        |
| <b>PRIMARY &amp; SECONDARY VEIN FEATURES</b>                                                                                          |                                                             |                                               |                        |
| PRIMARY VENATION: <u>Pinnate</u>                                                                                                      | NAKED BASAL VEINS: <u>Absent</u>                            |                                               |                        |
| MAJOR 2° Framework: <u>Semicraspedodromous</u>                                                                                        | N° BASAL VEINS: <u>1</u>                                    | Interior 2°: <u>Absent</u>                    |                        |
| MAJOR 2° Attachment: <u>Decurrent</u>                                                                                                 | MAJOR 2° VEIN ANGLE: <u>Abruptly increasing toward base</u> | MINOR-2° Course: _____                        |                        |
| MAJOR 2° SPACING: <u>Regular</u>                                                                                                      | AGROPHIC VEINS: <u>Absent</u>                               |                                               |                        |
| INTER-2° proximal course: _____                                                                                                       | INTER-2° VEIN LENGTH: _____                                 |                                               |                        |
| INTER-2° distal course: _____                                                                                                         | INTER-2° FREQUENCY: _____                                   |                                               |                        |
| <b>TERTIARY VEIN FEATURES</b>                                                                                                         |                                                             |                                               |                        |
| INTERCOSTAL 3°: <u>Opposite percurrent - straight</u>                                                                                 | PERIMARGINAL VEINS: <u>None</u>                             |                                               |                        |
| EPIMEDIAL 3°: <u>Opposite percurrent</u>                                                                                              | INTER-3° ANGLE TO 1°: <u>Acute to midvein</u>               |                                               |                        |
| ADMEDIAL COURSE: <u>Acute to midvein</u>                                                                                              | EXTERIOR 3° COURSE: <u>Absent</u>                           |                                               |                        |
| EXMEDIAL COURSE: <u>Basiflexed</u>                                                                                                    | INTERCOSTAL 3° VARIABILITY: <u>Increasing exmedially</u>    |                                               |                        |
| <b>FOURTH &amp; HIGHER ORDER VEIN FEATURES</b>                                                                                        |                                                             |                                               |                        |
| 4° VEIN FABRIC: <u>Not Preserved</u>                                                                                                  | VEINLETS -F/E/V/s: <u>Not Preserved</u>                     |                                               |                        |
| 5° VEIN FABRIC: <u>Not Preserved</u>                                                                                                  | TYPE OF F.E.V. BRANCHING: <u>n.p</u>                        |                                               |                        |
| MARGINAL VENATION: <u>Not Preserved</u>                                                                                               | F.E.V.s TERMINATIONS: <u>Not Preserved</u>                  |                                               |                        |
| AREOLATION: <u>Not Preserved</u>                                                                                                      | LEAF RANK: _____                                            |                                               |                        |
| <b>TOOTH FEATURES</b>                                                                                                                 |                                                             |                                               |                        |
| ORDERS OF TEETH: <u>1</u>                                                                                                             | No TEETH/cm: <u>1</u>                                       | TEETH GLANDULARITY: <u>Not Preserved</u>      |                        |
| TOOTH SHAPE: <u>cv/cc</u>                                                                                                             | TOOTH SPACING: <u>Not Preserved</u>                         |                                               |                        |
| PRINCIPAL VEIN: <u>Present</u>                                                                                                        | SINUS SHAPE: <u>Angular</u>                                 |                                               |                        |
| ACCESSORY VEIN COURSE: <u>Not Preserved</u>                                                                                           | PRINCIPAL VEIN TERM.: <u>Marginal, on proximal flank</u>    |                                               |                        |
| <b>NOTES</b>                                                                                                                          |                                                             |                                               |                        |
| Morphotype sheet filled out using specimens: 1706-4 and 1701-1                                                                        |                                                             |                                               |                        |

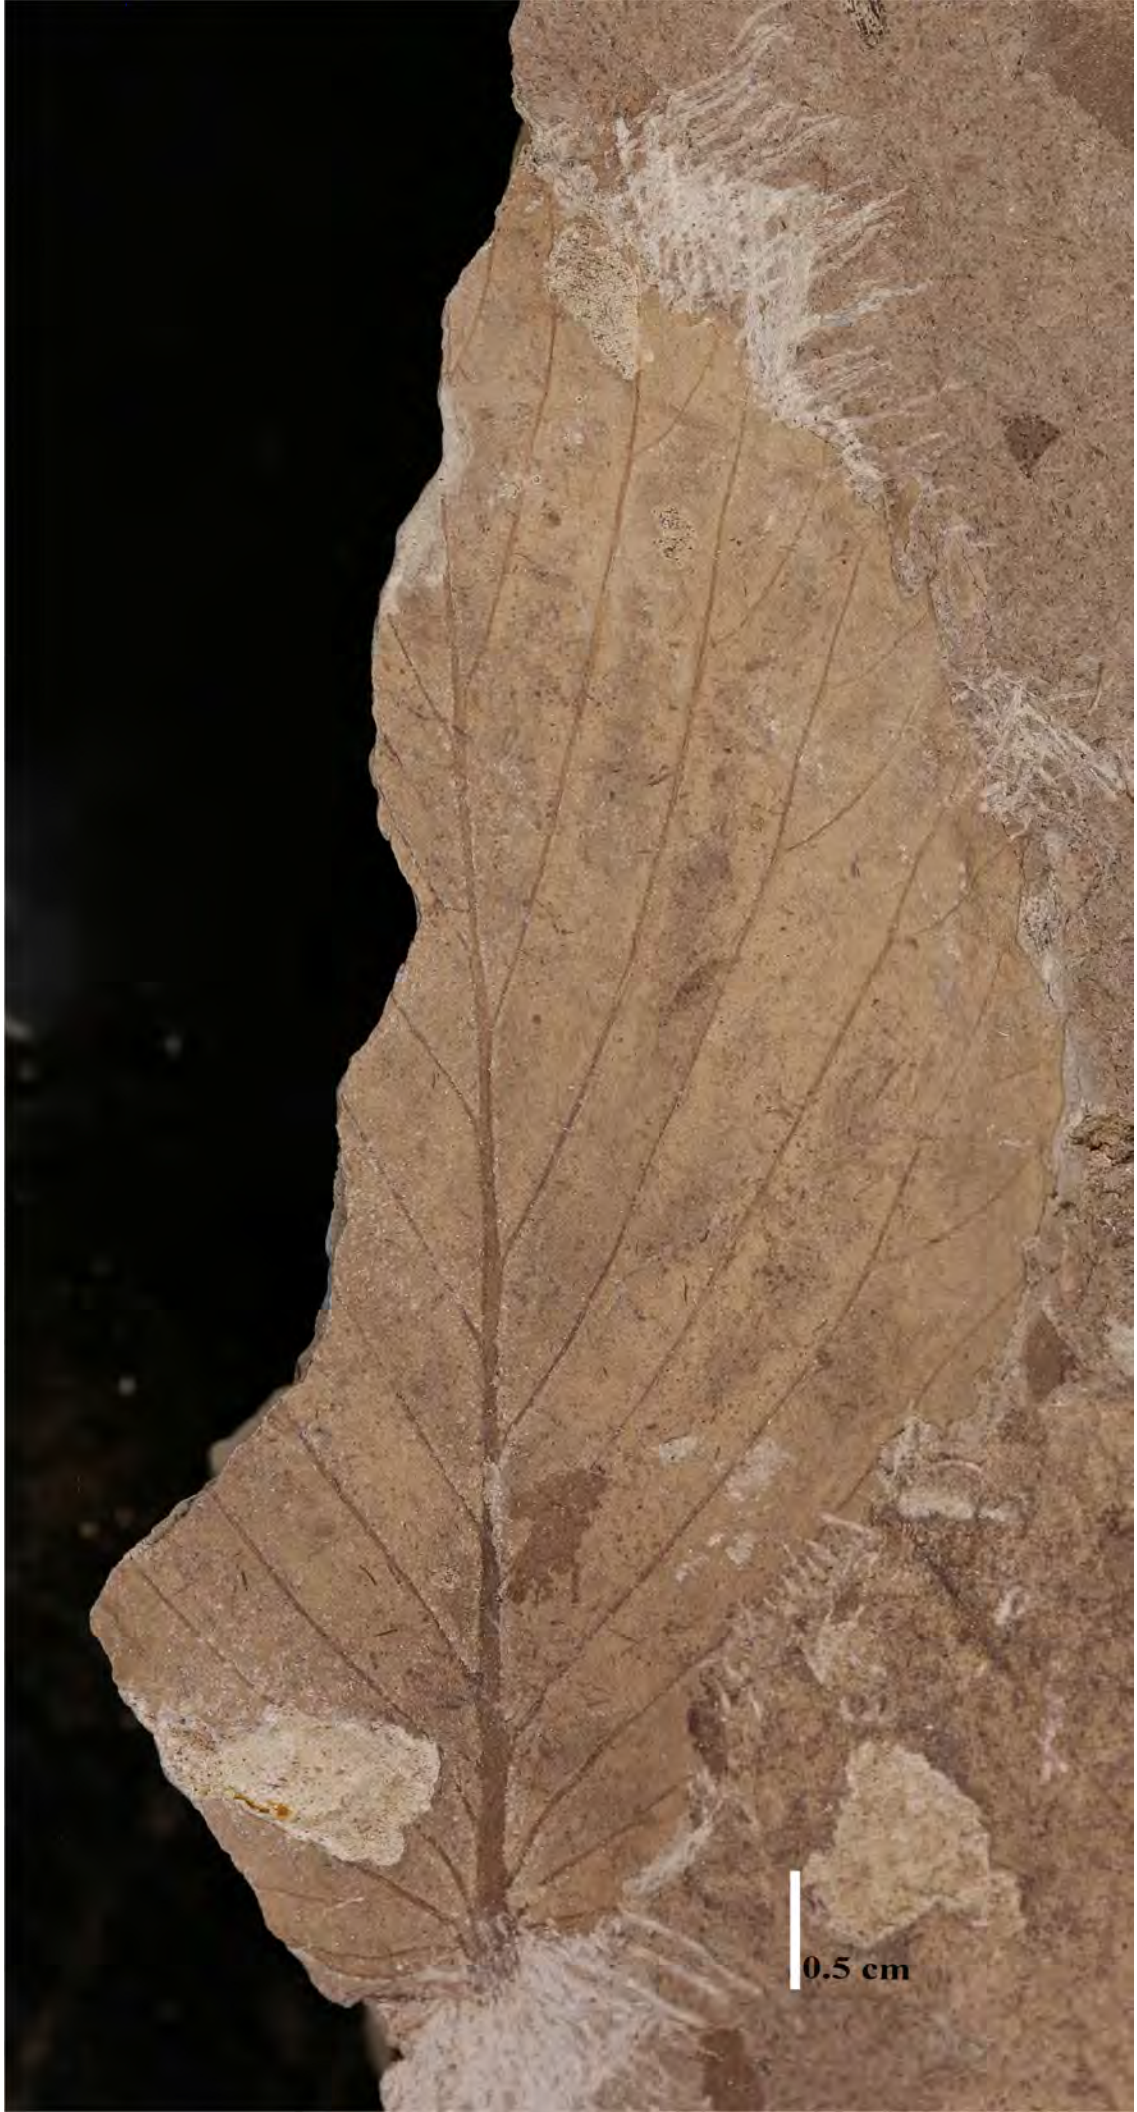



| MORPHOTYPE                                                                                                                                                                                                                                           | HB173                        | NAME                        |                                 |                          |               |
|------------------------------------------------------------------------------------------------------------------------------------------------------------------------------------------------------------------------------------------------------|------------------------------|-----------------------------|---------------------------------|--------------------------|---------------|
| <b>GENERAL</b>                                                                                                                                                                                                                                       | MAJOR GROUP                  | DIC                         | INFERED FAMILY                  | ORGAN TYPE               | Leaf          |
| EXEMPLAR LOC.                                                                                                                                                                                                                                        | Hanna Basin, WY              | EXEMPLAR                    | 1712-1                          | OTHERS LOC.              |               |
| <b>DIAGNOSTIC FEATURES OF MORPHOTYPE</b>                                                                                                                                                                                                             |                              |                             |                                 |                          |               |
| 3° veins perpendicular to midvein at the base but becomes acute to midvein towards the apex. Beautifully looped agrophic veins and very consistant, closely spaced 3° veins at the base. Lastly this morphotype has an asymmetrical basal insertion. |                              |                             |                                 |                          |               |
| MQI: _____                                                                                                                                                                                                                                           |                              |                             |                                 |                          |               |
| <b>LEAF ATTACHMENT, ORGANIZATION, SIZE, SHAPE AND PETIOLE FEATURES</b>                                                                                                                                                                               |                              |                             |                                 |                          |               |
| LEAF ATTACHMENT:                                                                                                                                                                                                                                     | Petiolate                    | LEAFLET ORGANIZATION:       | Not Preserved                   |                          |               |
| LEAF ARRANGEMENT:                                                                                                                                                                                                                                    | Not Preserved                | LEAFLET ATTACHMENT:         | np                              |                          |               |
| LEAF ORGANIZATION:                                                                                                                                                                                                                                   | Not Preserved                | PETIOLE ATTACHMENT.:        | Not Preserved                   |                          |               |
| BLADE SIZE:                                                                                                                                                                                                                                          | Microphyll-Mesophyll         | PETIOLE BASE:               | Not Preserved                   |                          |               |
| BLADE SHAPE:                                                                                                                                                                                                                                         | Elliptic                     | PETIOLE GLANDS.:            | Not Preserved                   |                          |               |
| BLADE RATIO L:W:                                                                                                                                                                                                                                     | 1.5:1                        | PETIOLE X-SECTION:          | Not Preserved                   |                          |               |
| LOBATION:                                                                                                                                                                                                                                            | Unlobed                      | MARGIN TYPE                 | Untoothed                       |                          |               |
| BASE ASYMMETRY:                                                                                                                                                                                                                                      | Basal insertion asymmetrical | MEDIAL SYMMETRY:            | Symmetrical                     |                          |               |
| BASE SHAPE:                                                                                                                                                                                                                                          | Rounded                      | APEX SHAPE:                 | Not preserved                   | Special Margin Features: | Not Preserved |
| BASE ANGLE:                                                                                                                                                                                                                                          | Obtuse                       | APEX ANGLE:                 | Not preserved                   | Terminal apex features:  | Not Preserved |
| <b>PRIMARY &amp; SECONDARY VEIN FEATURES</b>                                                                                                                                                                                                         |                              |                             |                                 |                          |               |
| PRIMARY VENATION:                                                                                                                                                                                                                                    | Basal actinodromous          | NAKED BASAL VEINS:          | Absent                          |                          |               |
| MAJOR 2° Framework:                                                                                                                                                                                                                                  | Eucamptodromous              | N° BASAL VEINS:             | 3                               | Interior 2°:             | Absent        |
| MAJOR 2° Attachment:                                                                                                                                                                                                                                 | Decurrent                    | MINOR-2° Course:            |                                 |                          |               |
| MAJOR 2° SPACING:                                                                                                                                                                                                                                    | Decreasing proximally        | MAJOR 2° VEIN ANGLE:        | Smoothly increasing toward base |                          |               |
|                                                                                                                                                                                                                                                      |                              | AGROPHIC VEINS:             | Simple                          |                          |               |
| INTER-2° proximal course:                                                                                                                                                                                                                            |                              | INTER-2° VEIN LENGTH:       |                                 |                          |               |
| INTER-2° distal course:                                                                                                                                                                                                                              |                              | INTER-2° FREQUENCY:         |                                 |                          |               |
| <b>TERTIARY VEIN FEATURES</b>                                                                                                                                                                                                                        |                              |                             |                                 |                          |               |
| INTERCOSTAL 3°:                                                                                                                                                                                                                                      | Mixed opp/alt percurrent     | PERIMARGINAL VEINS:         | None                            |                          |               |
| EPIMEDIAL 3°:                                                                                                                                                                                                                                        | Opposite percurrent          | INTER-3° ANGLE TO 1°:       | Perpendicular to midvein        |                          |               |
| ADMEDIAL COURSE:                                                                                                                                                                                                                                     | Perpendicular to midvein     | EXTERIOR 3° COURSE:         | Looped                          |                          |               |
| EXMEDIAL COURSE:                                                                                                                                                                                                                                     | Basiflexed                   | INTERCOSTAL 3° VARIABILITY: | Inconsistent                    |                          |               |
| <b>FOURTH &amp; HIGHER ORDER VEIN FEATURES</b>                                                                                                                                                                                                       |                              |                             |                                 |                          |               |
| 4° VEIN FABRIC:                                                                                                                                                                                                                                      | Not Preserved                | VEINLETS -F/E/V/s:          | Not Preserved                   |                          |               |
| 5° VEIN FABRIC:                                                                                                                                                                                                                                      | Not Preserved                | TYPE OF F.E.V. BRANCHING:   | n.p                             |                          |               |
| MARGINAL VENATION:                                                                                                                                                                                                                                   | Not Preserved                | F.E.V.s TERMINATIONS:       | Not Preserved                   |                          |               |
| AREOLATION:                                                                                                                                                                                                                                          | Not Preserved                | LEAF RANK:                  |                                 |                          |               |
| <b>TOOTH FEATURES</b>                                                                                                                                                                                                                                |                              |                             |                                 |                          |               |
| ORDERS OF TEETH:                                                                                                                                                                                                                                     |                              | No TEETH/cm:                |                                 | TEETH GLANDULARITY:      |               |
| TOOTH SHAPE:                                                                                                                                                                                                                                         |                              | TOOTH SPACING:              |                                 |                          |               |
| PRINCIPAL VEIN:                                                                                                                                                                                                                                      |                              | SINUS SHAPE:                |                                 |                          |               |
| ACCESSORY VEIN COURSE:                                                                                                                                                                                                                               |                              | PRINCIPAL VEIN TERM.:       |                                 |                          |               |
| <b>NOTES</b>                                                                                                                                                                                                                                         |                              |                             |                                 |                          |               |
| Morphotype sheet completed with specimens: 17012-1, 1704-80 and 1710-214                                                                                                                                                                             |                              |                             |                                 |                          |               |



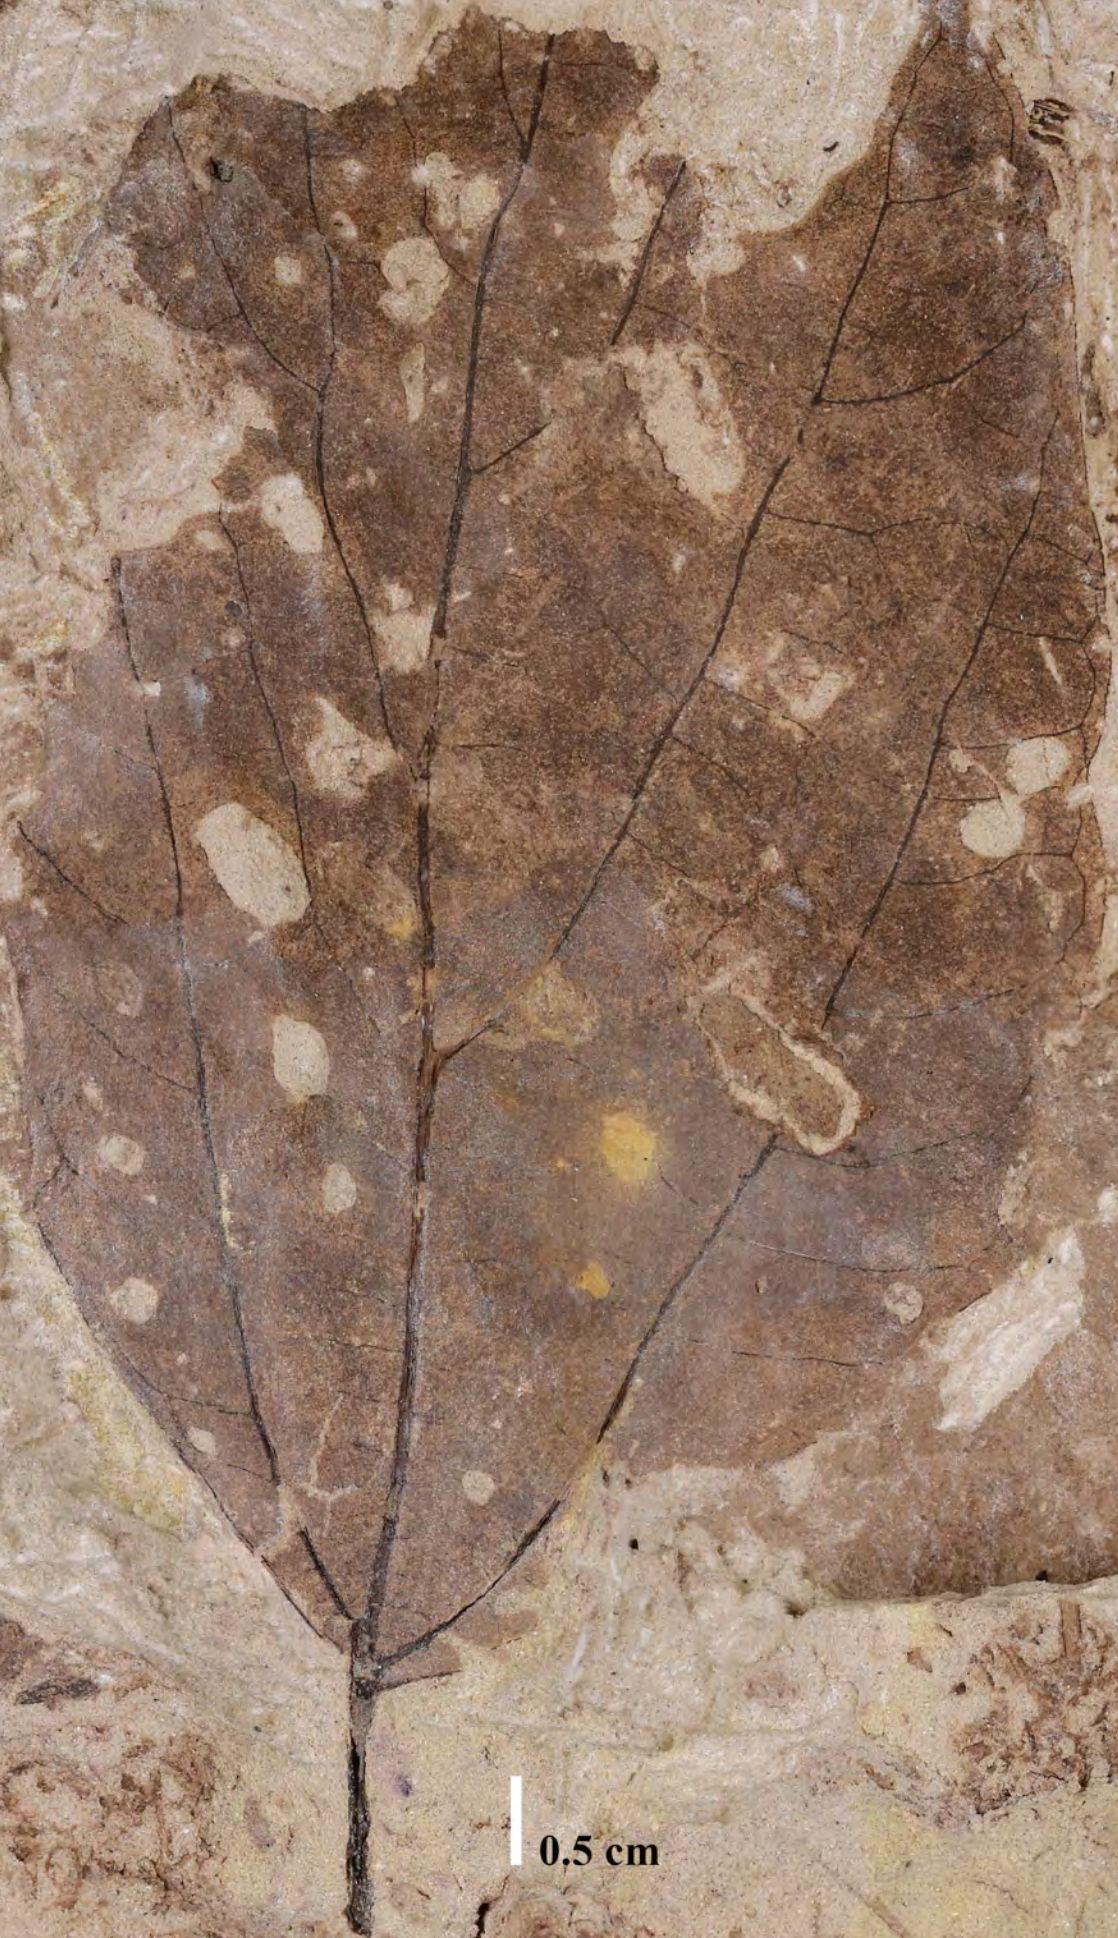

0.5 cm



| MORPHOTYPE                                                                                                                                                                                                                                                                                                                                     | HB174                          | NAME                        |                                 |                          |               |
|------------------------------------------------------------------------------------------------------------------------------------------------------------------------------------------------------------------------------------------------------------------------------------------------------------------------------------------------|--------------------------------|-----------------------------|---------------------------------|--------------------------|---------------|
| <b>GENERAL</b>                                                                                                                                                                                                                                                                                                                                 | MAJOR GROUP                    | DIC                         | INFERED FAMILY                  | ORGAN TYPE               | Leaf          |
| EXEMPLAR LOC.                                                                                                                                                                                                                                                                                                                                  | Hanna Basin, WY                | EXEMPLAR                    | 1710-6A, 1710-13B               | OTHERS LOC.              |               |
| <b>DIAGNOSTIC FEATURES OF MORPHOTYPE</b>                                                                                                                                                                                                                                                                                                       |                                |                             |                                 |                          |               |
| Crenate teeth with only one order of teeth and 5 teeth/cm. This is different from Fagopsophyllum which only has 1 tooth/cm. 2° veins spacing is regular however the veins are more compressed at the base and apex. This is a morphological feature that is unlike any other morphotype within the basin. The base is also cordate. MQI: _____ |                                |                             |                                 |                          |               |
| <b>LEAF ATTACHMENT, ORGANIZATION, SIZE, SHAPE AND PETIOLE FEATURES</b>                                                                                                                                                                                                                                                                         |                                |                             |                                 |                          |               |
| LEAF ATTACHMENT:                                                                                                                                                                                                                                                                                                                               | Not Preserved                  | LEAFLET ORGANIZATION:       | Not Preserved                   |                          |               |
| LEAF ARRANGEMENT:                                                                                                                                                                                                                                                                                                                              | Not Preserved                  | LEAFLET ATTACHMENT:         | np                              |                          |               |
| LEAF ORGANIZATION:                                                                                                                                                                                                                                                                                                                             | Not Preserved                  | PETIOLE ATTACHMENT.:        | Not Preserved                   |                          |               |
| BLADE SIZE:                                                                                                                                                                                                                                                                                                                                    | Nanophyll-Mesophyll            | PETIOLE BASE:               | Not Preserved                   |                          |               |
| BLADE SHAPE:                                                                                                                                                                                                                                                                                                                                   | Ovate                          | PETIOLE GLANDS.:            | Not Preserved                   |                          |               |
| BLADE RATIO L:W:                                                                                                                                                                                                                                                                                                                               | 2:1                            | PETIOLE X-SECTION:          | Not Preserved                   |                          |               |
| LOBATION:                                                                                                                                                                                                                                                                                                                                      | Unlobed                        | MARGIN TYPE                 | Crenate                         |                          |               |
| BASE ASYMMETRY:                                                                                                                                                                                                                                                                                                                                | Symmetrical                    | MEDIAL SYMMETRY:            | Symmetrical                     |                          |               |
| BASE SHAPE:                                                                                                                                                                                                                                                                                                                                    | Cordate                        | APEX SHAPE:                 | Not preserved                   | Special Margin Features: | Not Preserved |
| BASE ANGLE:                                                                                                                                                                                                                                                                                                                                    | Obtuse                         | APEX ANGLE:                 | Not preserved                   | Terminal apex features:  | Not Preserved |
| <b>PRIMARY &amp; SECONDARY VEIN FEATURES</b>                                                                                                                                                                                                                                                                                                   |                                |                             |                                 |                          |               |
| PRIMARY VENATION:                                                                                                                                                                                                                                                                                                                              | Pinnate                        | NAKED BASAL VEINS:          | Absent                          |                          |               |
| MAJOR 2° Framework:                                                                                                                                                                                                                                                                                                                            | Eucamptodromous                | N° BASAL VEINS:             | 1                               | Interior 2°:             | Absent        |
| MAJOR 2° Attachment:                                                                                                                                                                                                                                                                                                                           | Decurrent                      | MINOR-2° Course:            |                                 |                          |               |
| MAJOR 2° SPACING:                                                                                                                                                                                                                                                                                                                              | Regular                        | MAJOR 2° VEIN ANGLE:        | Smoothly increasing toward base |                          |               |
| INTER-2° proximal course:                                                                                                                                                                                                                                                                                                                      |                                | AGROPHIC VEINS:             | Absent                          |                          |               |
| INTER-2° distal course:                                                                                                                                                                                                                                                                                                                        |                                | INTER-2° VEIN LENGTH:       |                                 |                          |               |
|                                                                                                                                                                                                                                                                                                                                                |                                | INTER-2° FREQUENCY:         |                                 |                          |               |
| <b>TERTIARY VEIN FEATURES</b>                                                                                                                                                                                                                                                                                                                  |                                |                             |                                 |                          |               |
| INTERCOSTAL 3°:                                                                                                                                                                                                                                                                                                                                | Opposite percurrent - straight | PERIMARGINAL VEINS:         | None                            |                          |               |
| EPIMEDIAL 3°:                                                                                                                                                                                                                                                                                                                                  | Opposite percurrent            | INTER-3° ANGLE TO 1°:       | Acute to midvein                |                          |               |
| ADMEDIAL COURSE:                                                                                                                                                                                                                                                                                                                               | Perpendicular to midvein       | EXTERIOR 3° COURSE:         | Looped                          |                          |               |
| EXMEDIAL COURSE:                                                                                                                                                                                                                                                                                                                               | Basiflexed                     | INTERCOSTAL 3° VARIABILITY: | Consistent                      |                          |               |
| <b>FOURTH &amp; HIGHER ORDER VEIN FEATURES</b>                                                                                                                                                                                                                                                                                                 |                                |                             |                                 |                          |               |
| 4° VEIN FABRIC:                                                                                                                                                                                                                                                                                                                                | Not Preserved                  | VEINLETS -F/E/V/s:          | Not Preserved                   |                          |               |
| 5° VEIN FABRIC:                                                                                                                                                                                                                                                                                                                                | Not Preserved                  | TYPE OF F.E.V. BRANCHING:   | n.p                             |                          |               |
| MARGINAL VENATION:                                                                                                                                                                                                                                                                                                                             | Not Preserved                  | F.E.V.s TERMINATIONS:       | Not Preserved                   |                          |               |
| AREOLATION:                                                                                                                                                                                                                                                                                                                                    | Not Preserved                  | LEAF RANK:                  |                                 |                          |               |
| <b>TOOTH FEATURES</b>                                                                                                                                                                                                                                                                                                                          |                                |                             |                                 |                          |               |
| ORDERS OF TEETH:                                                                                                                                                                                                                                                                                                                               | 1                              | No TEETH/cm:                | 5                               | TEETH GLANDULARITY:      | Not Preserved |
| TOOTH SHAPE:                                                                                                                                                                                                                                                                                                                                   | cv/rt                          | TOOTH SPACING:              | Regular                         |                          |               |
| PRINCIPAL VEIN:                                                                                                                                                                                                                                                                                                                                | Absent                         | SINUS SHAPE:                | Rounded                         |                          |               |
| ACCESSORY VEIN COURSE:                                                                                                                                                                                                                                                                                                                         | Looped                         | PRINCIPAL VEIN TERM.:       | Not Preserved                   |                          |               |
| <b>NOTES</b>                                                                                                                                                                                                                                                                                                                                   |                                |                             |                                 |                          |               |
| Morphosheet completed with spimens: 1710-6A and 1710-13B                                                                                                                                                                                                                                                                                       |                                |                             |                                 |                          |               |

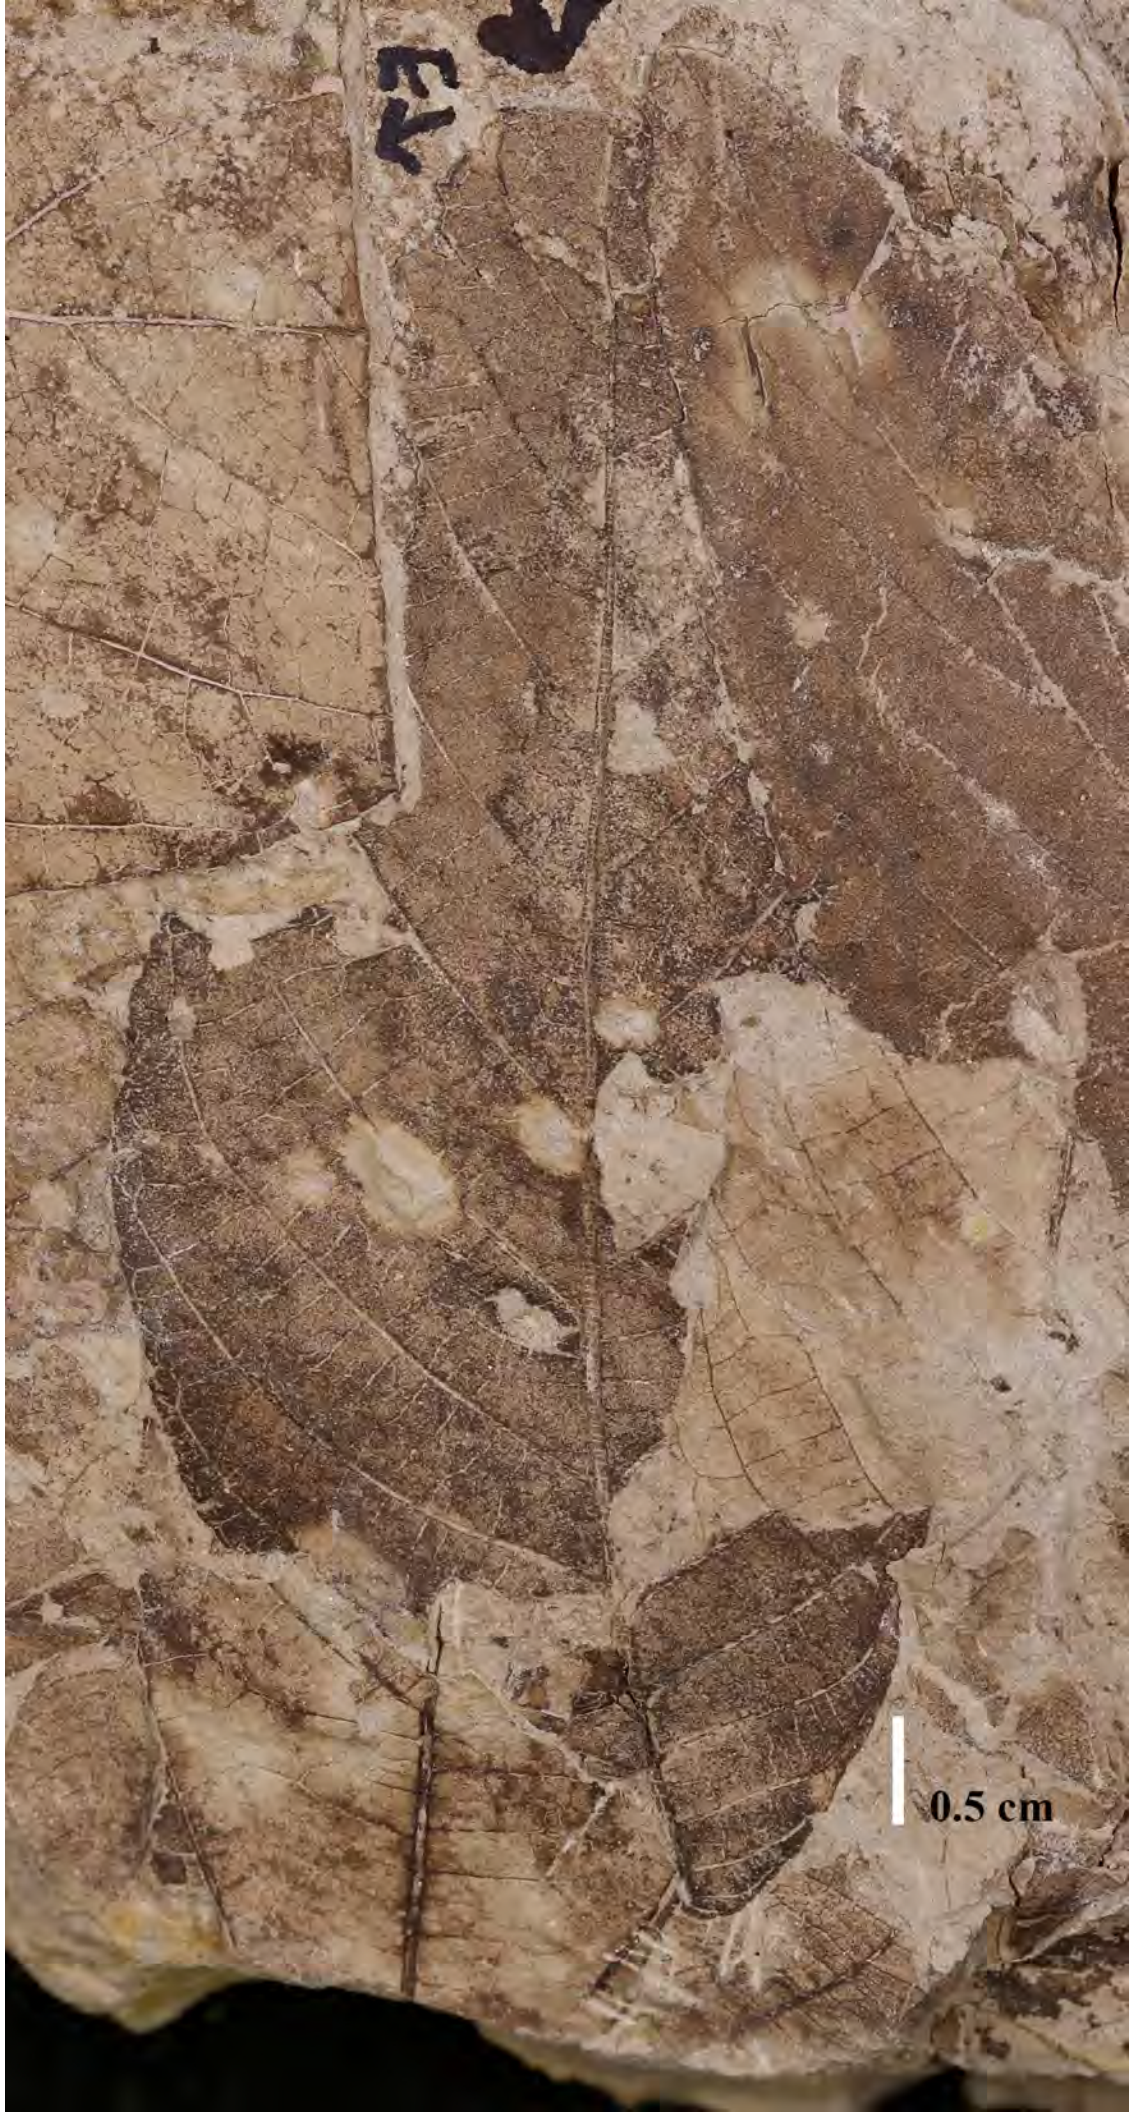



| MORPHOTYPE                                                                                                                                                                                                              | HB175                        | NAME                        |                       |                          |               |
|-------------------------------------------------------------------------------------------------------------------------------------------------------------------------------------------------------------------------|------------------------------|-----------------------------|-----------------------|--------------------------|---------------|
| <b>GENERAL</b>                                                                                                                                                                                                          | MAJOR GROUP                  | DIC                         | INFERED FAMILY        | ORGAN TYPE               | Leaf          |
| EXEMPLAR LOC.                                                                                                                                                                                                           | LAS1703                      | EXEMPLAR                    | 1703-2, 1704-111A     | OTHERS LOC.              | LAS 1704      |
| DIAGNOSTIC FEATURES OF MORPHOTYPE                                                                                                                                                                                       |                              |                             |                       |                          |               |
| 2° veins are regularly spaced throughout the leaf, while the higher order veins at the apex and base are rarely preserved. Unlike Fagopsophyllum, this species has serrate teeth with 2 orders and averages 4 teeth/cm. |                              |                             |                       |                          |               |
| MQI: _____                                                                                                                                                                                                              |                              |                             |                       |                          |               |
| <b>LEAF ATTACHMENT, ORGANIZATION, SIZE, SHAPE AND PETIOLE FEATURES</b>                                                                                                                                                  |                              |                             |                       |                          |               |
| LEAF ATTACHMENT:                                                                                                                                                                                                        | Petiolate                    | LEAFLET ORGANIZATION:       | Not Preserved         |                          |               |
| LEAF ARRANGEMENT:                                                                                                                                                                                                       | Not Preserved                | LEAFLET ATTACHMENT:         | np                    |                          |               |
| LEAF ORGANIZATION:                                                                                                                                                                                                      | Not Preserved                | PETIOLE ATTACHMENT.:        | Not Preserved         |                          |               |
| BLADE SIZE:                                                                                                                                                                                                             | Microphyl-Notophyll          | PETIOLE BASE:               | Not Preserved         |                          |               |
| BLADE SHAPE:                                                                                                                                                                                                            | Not Preserved                | PETIOLE GLANDS.:            | NP                    |                          |               |
| BLADE RATIO L:W:                                                                                                                                                                                                        | 2:1                          | PETIOLE X-SECTION:          | NP                    |                          |               |
| LOBATION:                                                                                                                                                                                                               | Unlobed                      | MARGIN TYPE                 | Serrate               |                          |               |
| BASE ASYMMETRY:                                                                                                                                                                                                         | Not Preserved                | MEDIAL SYMMETRY:            | Not Preserved         |                          |               |
| BASE SHAPE:                                                                                                                                                                                                             | Rounded                      | APEX SHAPE:                 | Acuminate             | Special Margin Features: | Not Preserved |
| BASE ANGLE:                                                                                                                                                                                                             | Obtuse                       | APEX ANGLE:                 | Acute                 | Terminal apex features:  | Not Preserved |
| <b>PRIMARY &amp; SECONDARY VEIN FEATURES</b>                                                                                                                                                                            |                              |                             |                       |                          |               |
| PRIMARY VENATION:                                                                                                                                                                                                       | Pinnate                      | NAKED BASAL VEINS:          | Not Preserved         |                          |               |
| MAJOR 2° Framework:                                                                                                                                                                                                     | Craspedodromous              | N° BASAL VEINS:             | 1                     | Interior 2°:             | Absent        |
| MAJOR 2° Attachment:                                                                                                                                                                                                    | Excurent                     | MINOR-2° Course:            |                       |                          |               |
| MAJOR 2° SPACING:                                                                                                                                                                                                       | Regular                      | MAJOR 2° VEIN ANGLE:        | Uniform               |                          |               |
| INTER-2° proximal course:                                                                                                                                                                                               |                              | AGROPHIC VEINS:             | Absent                |                          |               |
| INTER-2° distal course:                                                                                                                                                                                                 |                              | INTER-2° VEIN LENGTH:       |                       |                          |               |
|                                                                                                                                                                                                                         |                              | INTER-2° FREQUENCY:         |                       |                          |               |
| <b>TERTIARY VEIN FEATURES</b>                                                                                                                                                                                           |                              |                             |                       |                          |               |
| INTERCOSTAL 3°:                                                                                                                                                                                                         | Opposite percurrent - convex | PERIMARGINAL VEINS:         | None                  |                          |               |
| EPIMEDIAL 3°:                                                                                                                                                                                                           | Not preserved                | INTER-3° ANGLE TO 1°:       | Acute to midvein      |                          |               |
| ADMEDIAL COURSE:                                                                                                                                                                                                        | Obtuse to midvein            | EXTERIOR 3° COURSE:         | Absent                |                          |               |
| EXMEDIAL COURSE:                                                                                                                                                                                                        | Basiflexed                   | INTERCOSTAL 3° VARIABILITY: | Increasing proximally |                          |               |
| <b>FOURTH &amp; HIGHER ORDER VEIN FEATURES</b>                                                                                                                                                                          |                              |                             |                       |                          |               |
| 4° VEIN FABRIC:                                                                                                                                                                                                         | Opposite percurrent          | VEINLETS -F/E/V/s:          | Not Preserved         |                          |               |
| 5° VEIN FABRIC:                                                                                                                                                                                                         | Regular reticulate           | TYPE OF F.E.V. BRANCHING:   | n.p                   |                          |               |
| MARGINAL VENATION:                                                                                                                                                                                                      | Not Preserved                | F.E.V.s TERMINATIONS:       | Not Preserved         |                          |               |
| AREOLATION:                                                                                                                                                                                                             | Moderately developed         | LEAF RANK:                  |                       |                          |               |
| <b>TOOTH FEATURES</b>                                                                                                                                                                                                   |                              |                             |                       |                          |               |
| ORDERS OF TEETH:                                                                                                                                                                                                        | 2                            | No TEETH/cm:                | 4                     | TEETH GLANDULARITY:      | None          |
| TOOTH SHAPE:                                                                                                                                                                                                            | cv/rt                        | TOOTH SPACING:              | Regular               |                          |               |
| PRINCIPAL VEIN:                                                                                                                                                                                                         | Present                      | SINUS SHAPE:                | Angular               |                          |               |
| ACCESSORY VEIN COURSE:                                                                                                                                                                                                  | Absent                       | PRINCIPAL VEIN TERM.:       | Marginal, at apex     |                          |               |
| <b>NOTES</b>                                                                                                                                                                                                            |                              |                             |                       |                          |               |
| Specimens used to complete morphosheet: 1703-2 and 1704-111A                                                                                                                                                            |                              |                             |                       |                          |               |

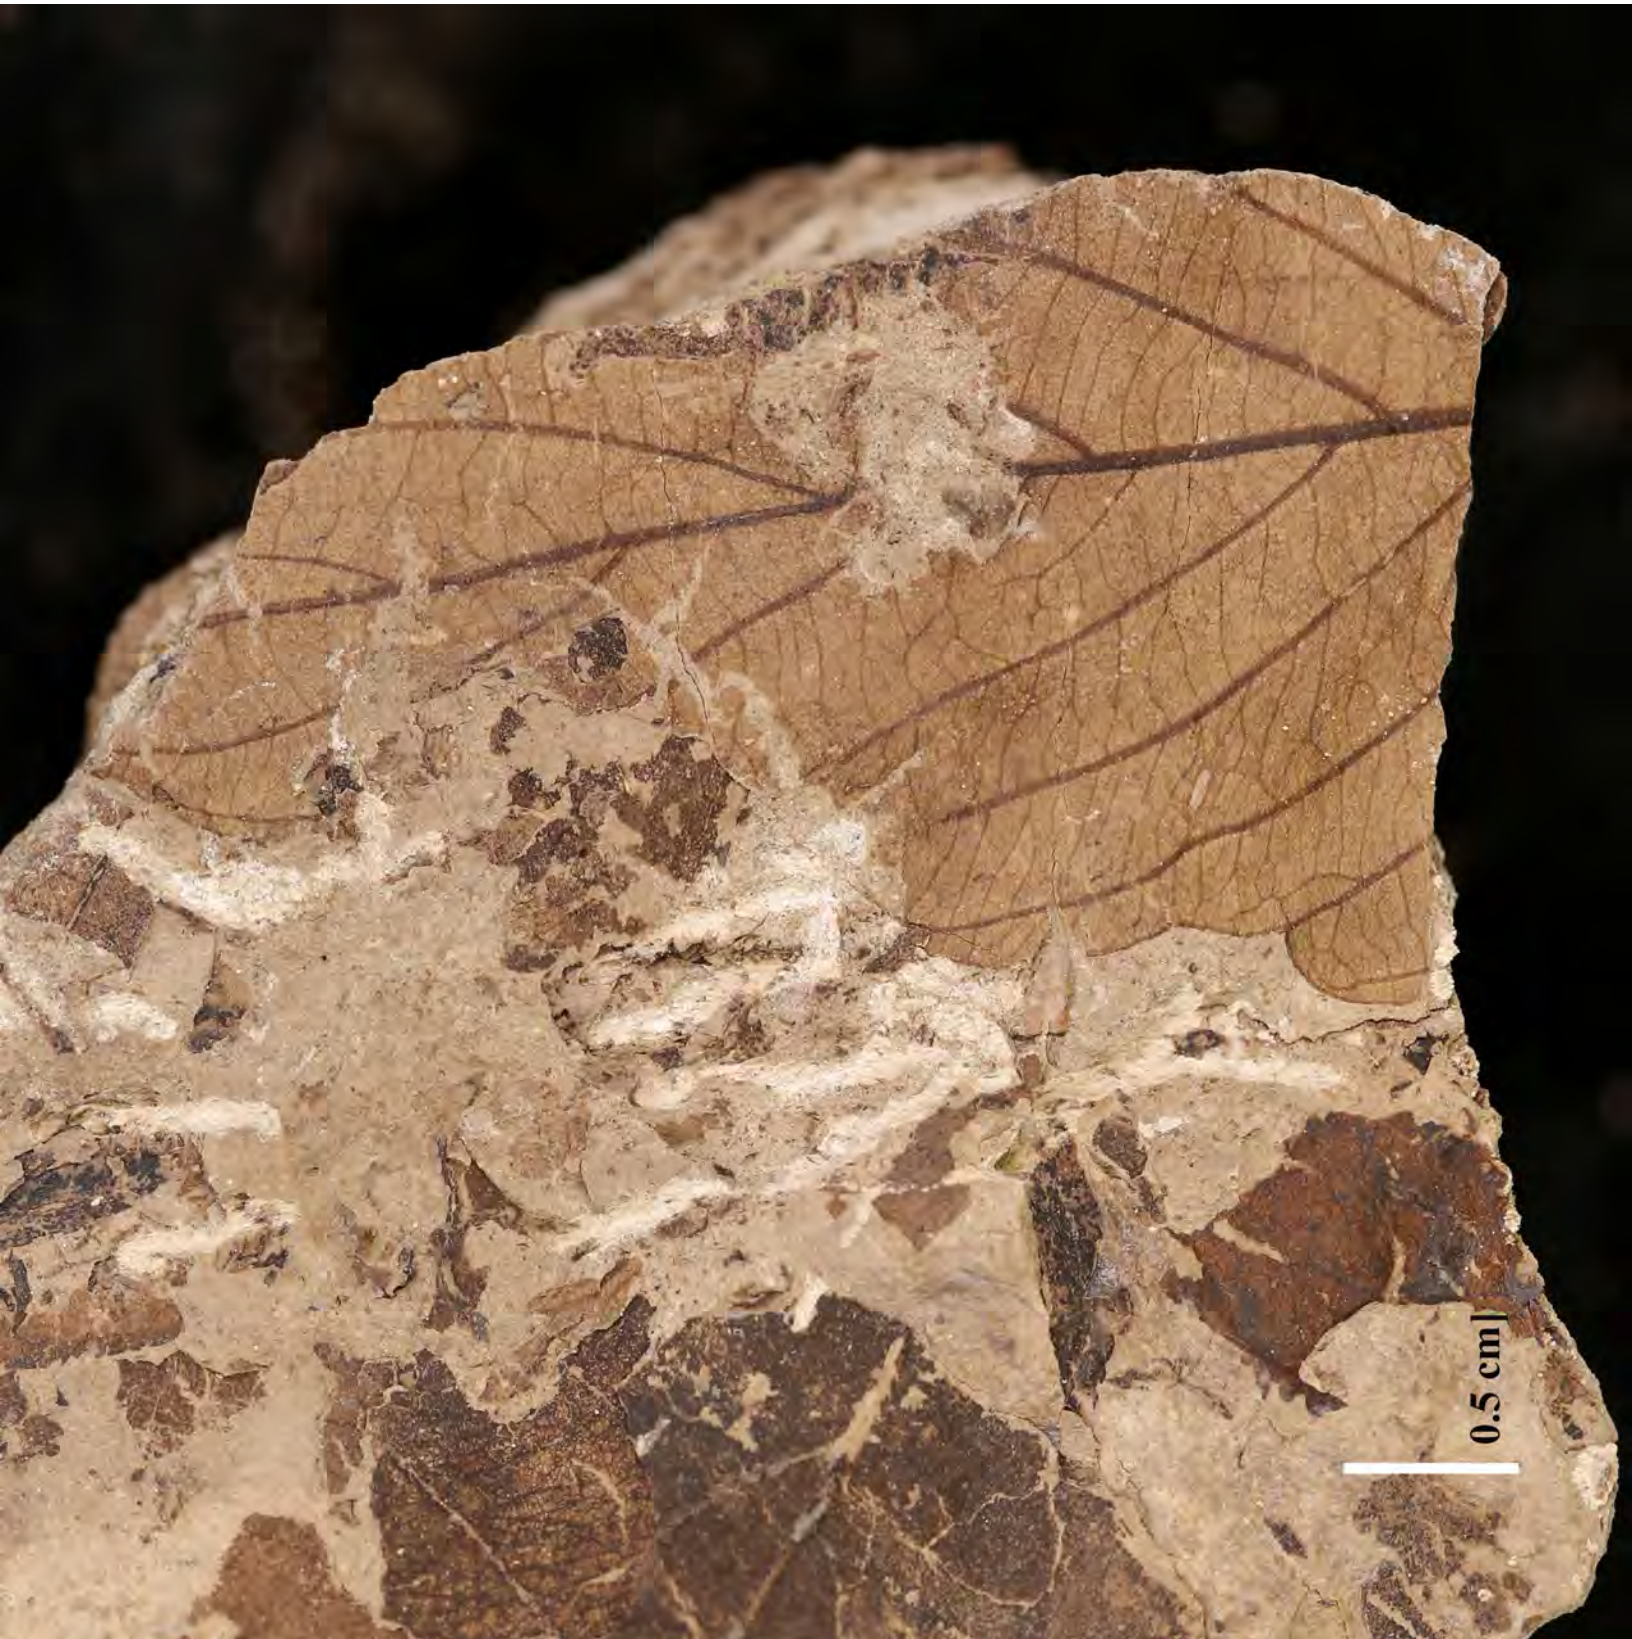



| MORPHOTYPE                                                                                                                                                                                                    | HB176                                                       | NAME                                          |                        |
|---------------------------------------------------------------------------------------------------------------------------------------------------------------------------------------------------------------|-------------------------------------------------------------|-----------------------------------------------|------------------------|
| <b>GENERAL</b>                                                                                                                                                                                                | MAJOR GROUP <u>DIC</u>                                      | INFERED FAMILY _____                          | ORGAN TYPE <u>Leaf</u> |
| EXEMPLAR LOC. <u>Hanna Basin, WY</u>                                                                                                                                                                          | EXEMPLAR <u>1704-1, 1704-76</u>                             | OTHERS LOC. _____                             |                        |
| <b>DIAGNOSTIC FEATURES OF MORPHOTYPE</b>                                                                                                                                                                      |                                                             |                                               |                        |
| <u>2° veination is mixed! The framework is both eucamptodromous and simply brochidodromous as you move from the base of the leaf to the apex. When preserved, apex has a very dramatic/extended drip tip.</u> |                                                             |                                               |                        |
|                                                                                                                                                                                                               |                                                             |                                               | MQI: _____             |
| <b>LEAF ATTACHMENT, ORGANIZATION, SIZE, SHAPE AND PETIOLE FEATURES</b>                                                                                                                                        |                                                             |                                               |                        |
| LEAF ATTACHMENT: <u>Not Preserved</u>                                                                                                                                                                         | LEAFLET ORGANIZATION: <u>Not Preserved</u>                  |                                               |                        |
| LEAF ARRANGEMENT: <u>Not Preserved</u>                                                                                                                                                                        | LEAFLET ATTACHMENT: <u>np</u>                               |                                               |                        |
| LEAF ORGANIZATION: <u>Not Preserved</u>                                                                                                                                                                       | PETIOLE ATTACHMENT.: <u>Not Preserved</u>                   |                                               |                        |
| BLADE SIZE: <u>Microphyll-Mesohyll</u>                                                                                                                                                                        | PETIOLE BASE: <u>Not Preserved</u>                          |                                               |                        |
| BLADE SHAPE: <u>Not Preserved</u>                                                                                                                                                                             | PETIOLE GLANDS.: <u>NP</u>                                  |                                               |                        |
| BLADE RATIO L:W: <u>1.5:1</u>                                                                                                                                                                                 | PETIOLE X-SECTION: <u>NP</u>                                |                                               |                        |
| LOBATION: <u>Unlobed</u>                                                                                                                                                                                      | MARGIN TYPE: <u>Untoothed</u>                               |                                               |                        |
| BASE ASYMMETRY: <u>Not Preserved</u>                                                                                                                                                                          | MEDIAL SYMMETRY: <u>Symmetrical</u>                         |                                               |                        |
| BASE SHAPE: <u>Convex</u>                                                                                                                                                                                     | APEX SHAPE: <u>Acuminate</u>                                | Special Margin Features: <u>Not Preserved</u> |                        |
| BASE ANGLE: <u>Obtuse</u>                                                                                                                                                                                     | APEX ANGLE: <u>Acute</u>                                    | Terminal apex features: _____                 |                        |
| <b>PRIMARY &amp; SECONDARY VEIN FEATURES</b>                                                                                                                                                                  |                                                             |                                               |                        |
| PRIMARY VENATION: <u>Pinnate</u>                                                                                                                                                                              | NAKED BASAL VEINS: <u>Not Preserved</u>                     |                                               |                        |
| MAJOR 2° Framework: <u>Mixed framework</u>                                                                                                                                                                    | N° BASAL VEINS: <u>1</u>                                    | Interior 2°: <u>Absent</u>                    |                        |
| MAJOR 2° Attachment: <u>Decurrent</u>                                                                                                                                                                         | MAJOR 2° VEIN ANGLE: <u>Smoothly increasing toward base</u> | MINOR-2° Course: _____                        |                        |
| MAJOR 2° SPACING: <u>Regular</u>                                                                                                                                                                              | AGROPHIC VEINS: <u>Absent</u>                               |                                               |                        |
| INTER-2° proximal course: _____                                                                                                                                                                               | INTER-2° VEIN LENGTH: _____                                 |                                               |                        |
| INTER-2° distal course: _____                                                                                                                                                                                 | INTER-2° FREQUENCY: _____                                   |                                               |                        |
| <b>TERTIARY VEIN FEATURES</b>                                                                                                                                                                                 |                                                             |                                               |                        |
| INTERCOSTAL 3°: <u>Mixed opp/alt percurrent</u>                                                                                                                                                               | PERIMARGINAL VEINS: <u>None</u>                             |                                               |                        |
| EPIMEDIAL 3°: <u>Mixed opp/alt percurrent</u>                                                                                                                                                                 | INTER-3° ANGLE TO 1°: <u>Obtuse or perpendicular</u>        |                                               |                        |
| ADMEDIAL COURSE: <u>Acute to midvein</u>                                                                                                                                                                      | EXTERIOR 3° COURSE: <u>Looped</u>                           |                                               |                        |
| EXMEDIAL COURSE: <u>Basiflexed</u>                                                                                                                                                                            | INTERCOSTAL 3° VARIABILITY: <u>Decreasing exmedially</u>    |                                               |                        |
| <b>FOURTH &amp; HIGHER ORDER VEIN FEATURES</b>                                                                                                                                                                |                                                             |                                               |                        |
| 4° VEIN FABRIC: <u>Alternate percurrent</u>                                                                                                                                                                   | VEINLETS -F/E/V/s: <u>Not Preserved</u>                     |                                               |                        |
| 5° VEIN FABRIC: <u>Regular reticulate</u>                                                                                                                                                                     | TYPE OF F.E.V. BRANCHING: <u>n.p</u>                        |                                               |                        |
| MARGINAL VENATION: <u>Not Preserved</u>                                                                                                                                                                       | F.E.V.s TERMINATIONS: <u>Not Preserved</u>                  |                                               |                        |
| AREOLATION: <u>Well developed</u>                                                                                                                                                                             | LEAF RANK: _____                                            |                                               |                        |
| <b>TOOTH FEATURES</b>                                                                                                                                                                                         |                                                             |                                               |                        |
| ORDERS OF TEETH: _____                                                                                                                                                                                        | No TEETH/cm: _____                                          | TEETH GLANDULARITY: _____                     |                        |
| TOOTH SHAPE: _____                                                                                                                                                                                            | TOOTH SPACING: _____                                        |                                               |                        |
| PRINCIPAL VEIN: _____                                                                                                                                                                                         | SINUS SHAPE: _____                                          |                                               |                        |
| ACCESSORY VEIN COURSE: _____                                                                                                                                                                                  | PRINCIPAL VEIN TERM.: _____                                 |                                               |                        |
| <b>NOTES</b>                                                                                                                                                                                                  |                                                             |                                               |                        |
| Specimens used for morphosheet: 1704-1, 1704-76                                                                                                                                                               |                                                             |                                               |                        |

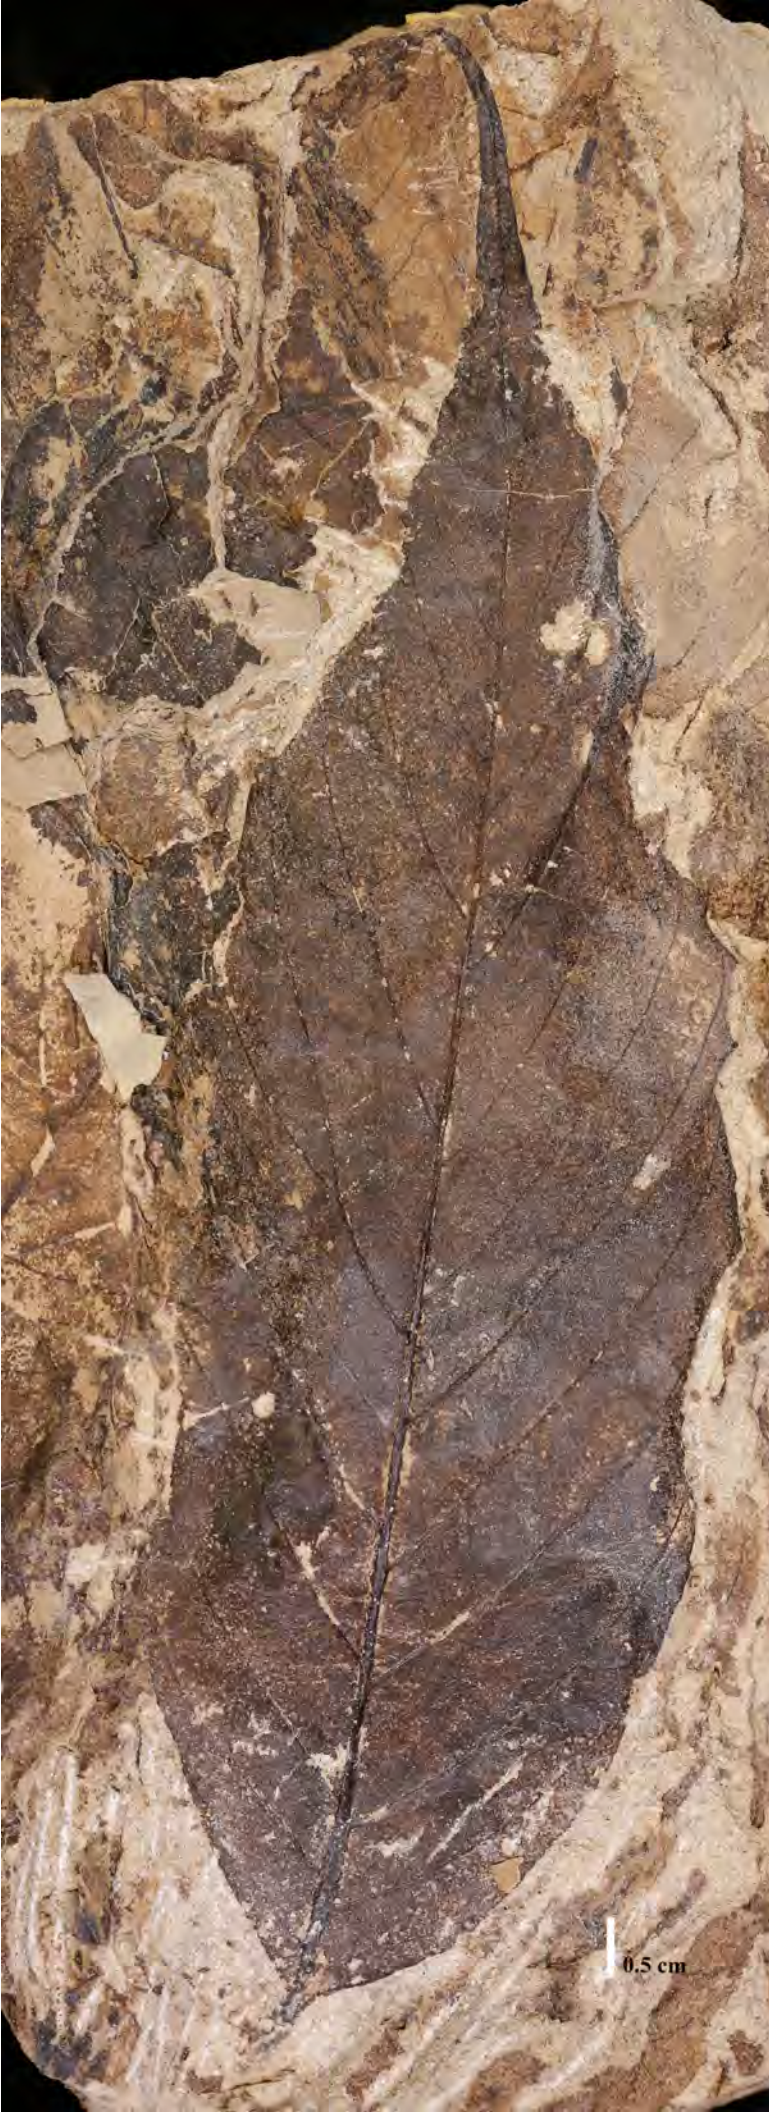



| MORPHOTYPE                                                                                                                                              | HB177                          | NAME                        |                                 |                          |               |
|---------------------------------------------------------------------------------------------------------------------------------------------------------|--------------------------------|-----------------------------|---------------------------------|--------------------------|---------------|
| <b>GENERAL</b>                                                                                                                                          | MAJOR GROUP                    | DIC                         | INFERED FAMILY                  | ORGAN TYPE               | Leaf          |
| EXEMPLAR LOC.                                                                                                                                           | Hanna Basin, WY                | EXEMPLAR                    | 1704-9A                         | OTHERS LOC.              |               |
| DIAGNOSTIC FEATURES OF MORPHOTYPE                                                                                                                       |                                |                             |                                 |                          |               |
| 2° veins have a mixed framework which is unlike any other pinnate leaf found at these sites. The framework is both brochidodromous and eucamptodromous. |                                |                             |                                 |                          |               |
| MQI: _____                                                                                                                                              |                                |                             |                                 |                          |               |
| <b>LEAF ATTACHMENT, ORGANIZATION, SIZE, SHAPE AND PETIOLE FEATURES</b>                                                                                  |                                |                             |                                 |                          |               |
| LEAF ATTACHMENT:                                                                                                                                        | Petiolate                      | LEAFLET ORGANIZATION:       | Not Preserved                   |                          |               |
| LEAF ARRANGEMENT:                                                                                                                                       | Not Preserved                  | LEAFLET ATTACHMENT:         | np                              |                          |               |
| LEAF ORGANIZATION:                                                                                                                                      | Not Preserved                  | PETIOLE ATTACHMENT.:        | Not Preserved                   |                          |               |
| BLADE SIZE:                                                                                                                                             | Notophyll                      | PETIOLE BASE:               | Not Preserved                   |                          |               |
| BLADE SHAPE:                                                                                                                                            | Obovate                        | PETIOLE GLANDS.:            | NP                              |                          |               |
| BLADE RATIO L:W:                                                                                                                                        | 2:1                            | PETIOLE X-SECTION:          | NP                              |                          |               |
| LOBATION:                                                                                                                                               | Unlobed                        | MARGIN TYPE                 | Untoothed                       |                          |               |
| BASE ASYMMETRY:                                                                                                                                         | Symmetrical                    | MEDIAL SYMMETRY:            | Symmetrical                     |                          |               |
| BASE SHAPE:                                                                                                                                             | Convex                         | APEX SHAPE:                 | Straight                        | Special Margin Features: | Not Preserved |
| BASE ANGLE:                                                                                                                                             | Acute                          | APEX ANGLE:                 | Acute                           | Terminal apex features:  | Not Preserved |
| <b>PRIMARY &amp; SECONDARY VEIN FEATURES</b>                                                                                                            |                                |                             |                                 |                          |               |
| PRIMARY VENATION:                                                                                                                                       | Pinnate                        | NAKED BASAL VEINS:          | Not Preserved                   |                          |               |
| MAJOR 2° Framework:                                                                                                                                     | Mixed framework                | N° BASAL VEINS:             | 1                               | Interior 2°:             | Absent        |
| MAJOR 2° Attachment:                                                                                                                                    | Decurrent                      | MINOR-2° Course:            |                                 |                          |               |
| MAJOR 2° SPACING:                                                                                                                                       | Regular                        | MAJOR 2° VEIN ANGLE:        | Abruptly increasing toward base |                          |               |
| INTER-2° proximal course:                                                                                                                               |                                | AGROPHIC VEINS:             | Absent                          |                          |               |
| INTER-2° distal course:                                                                                                                                 |                                | INTER-2° VEIN LENGTH:       |                                 |                          |               |
|                                                                                                                                                         |                                | INTER-2° FREQUENCY:         |                                 |                          |               |
| <b>TERTIARY VEIN FEATURES</b>                                                                                                                           |                                |                             |                                 |                          |               |
| INTERCOSTAL 3°:                                                                                                                                         | Opposite percurrent - straight | PERIMARGINAL VEINS:         | None                            |                          |               |
| EPIMEDIAL 3°:                                                                                                                                           | Opposite percurrent            | INTER-3° ANGLE TO 1°:       | Obtuse to midvein               |                          |               |
| ADMEDIAL COURSE:                                                                                                                                        | Acute to midvein               | EXTERIOR 3° COURSE:         | Absent                          |                          |               |
| EXMEDIAL COURSE:                                                                                                                                        | Basiflexed                     | INTERCOSTAL 3° VARIABILITY: | Consistent                      |                          |               |
| <b>FOURTH &amp; HIGHER ORDER VEIN FEATURES</b>                                                                                                          |                                |                             |                                 |                          |               |
| 4° VEIN FABRIC:                                                                                                                                         | Not Preserved                  | VEINLETS -F/E/V/s:          | Not Preserved                   |                          |               |
| 5° VEIN FABRIC:                                                                                                                                         | Not Preserved                  | TYPE OF F.E.V. BRANCHING:   | n.p                             |                          |               |
| MARGINAL VENATION:                                                                                                                                      | Not Preserved                  | F.E.V.s TERMINATIONS:       | Not Preserved                   |                          |               |
| AREOLATION:                                                                                                                                             | Not Preserved                  | LEAF RANK:                  |                                 |                          |               |
| <b>TOOTH FEATURES</b>                                                                                                                                   |                                |                             |                                 |                          |               |
| ORDERS OF TEETH:                                                                                                                                        |                                | No TEETH/cm:                |                                 | TEETH GLANDULARITY:      |               |
| TOOTH SHAPE:                                                                                                                                            |                                | TOOTH SPACING:              |                                 |                          |               |
| PRINCIPAL VEIN:                                                                                                                                         |                                | SINUS SHAPE:                |                                 |                          |               |
| ACCESSORY VEIN COURSE:                                                                                                                                  |                                | PRINCIPAL VEIN TERM.:       |                                 |                          |               |
| <b>NOTES</b>                                                                                                                                            |                                |                             |                                 |                          |               |
| Morphosheet completed using specimens: 1704-46, 1704-212 and 1704-9A                                                                                    |                                |                             |                                 |                          |               |



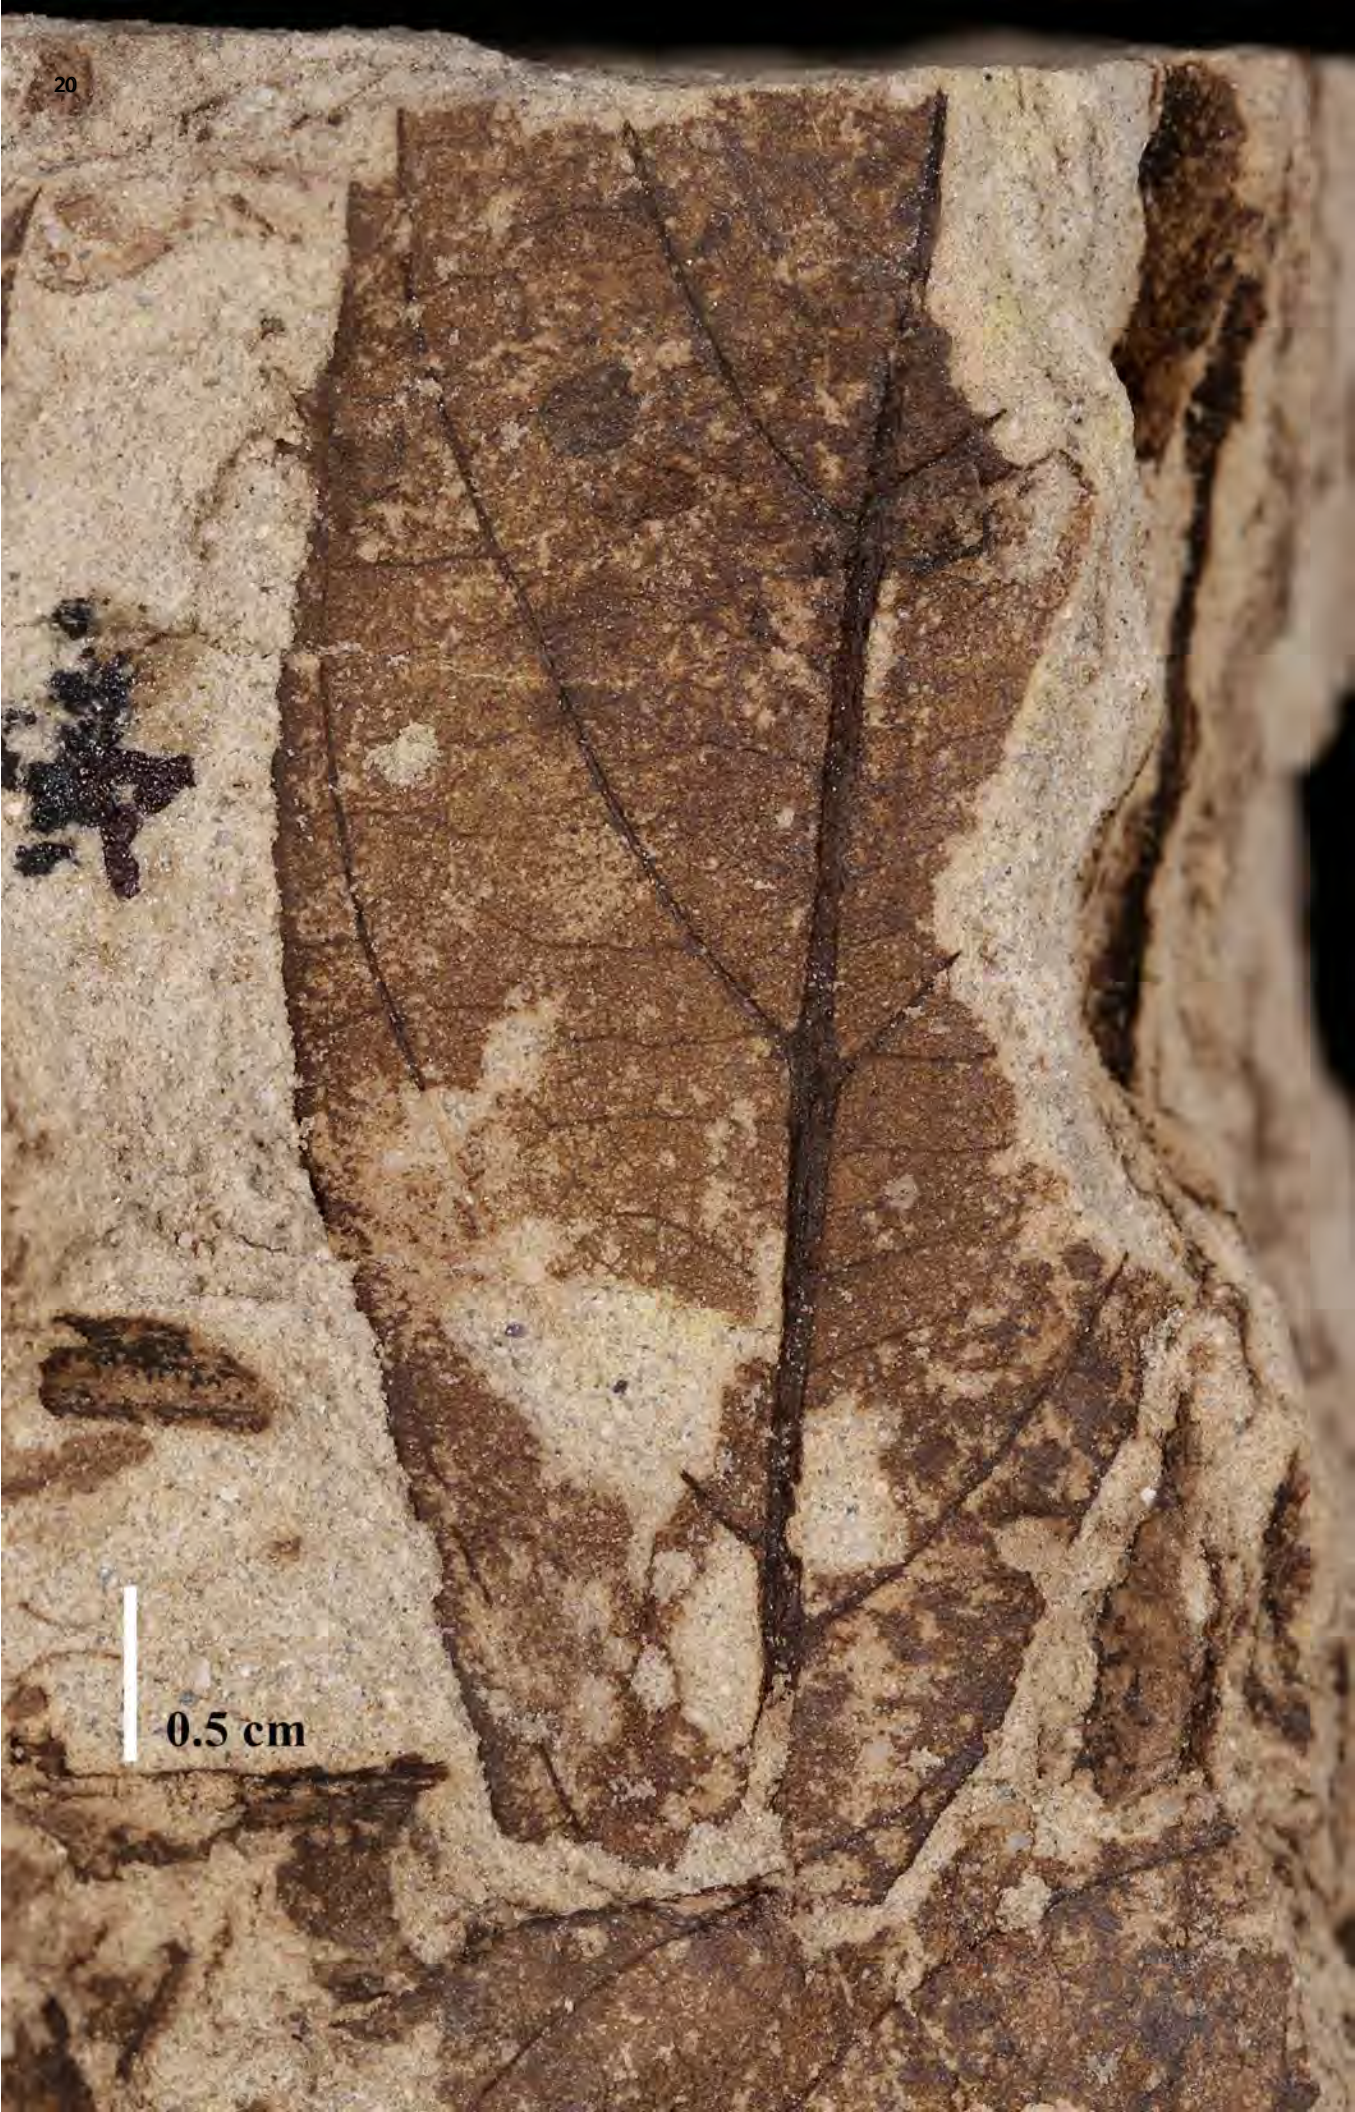

0.5 cm



| MORPHOTYPE                                                                 | HB178                    | NAME                  |                             |                                                                                                                                                                                                                                                                                                                                     |               |                     |
|----------------------------------------------------------------------------|--------------------------|-----------------------|-----------------------------|-------------------------------------------------------------------------------------------------------------------------------------------------------------------------------------------------------------------------------------------------------------------------------------------------------------------------------------|---------------|---------------------|
| <b>GENERAL</b>                                                             | MAJOR GROUP              | DIC                   | INFERED FAMILY              | Moraceae                                                                                                                                                                                                                                                                                                                            | ORGAN TYPE    | Leaf                |
| EXEMPLAR LOC.                                                              | Hanna Basin, WY          | EXEMPLAR              | EC1508_1, 1701_17B          | OTHERS LOC.                                                                                                                                                                                                                                                                                                                         |               |                     |
| DIAGNOSTIC FEATURES OF MORPHOTYPE                                          |                          |                       |                             | 3° veins are closely spaced and alternate between mixed opp/alt percurrent. The veins located in the middle of the leaf are dominated by opposite percurrent and become alternate toward the exterior of the leaf. 2° veins are eucamptoromous which is unlike other morphotypes with mixed frameworks and the base is symmetrical. |               |                     |
|                                                                            |                          |                       |                             | MQI:                                                                                                                                                                                                                                                                                                                                |               |                     |
| <b>LEAF ATTACHMENT, ORGANIZATION, SIZE, SHAPE AND PETIOLE FEATURES</b>     |                          |                       |                             |                                                                                                                                                                                                                                                                                                                                     |               |                     |
| LEAF ATTACHMENT:                                                           | Petiolate                | LEAFLET ORGANIZATION: | Not Preserved               |                                                                                                                                                                                                                                                                                                                                     |               |                     |
| LEAF ARRANGEMENT:                                                          | Not Preserved            | LEAFLET ATTACHMENT:   | np                          |                                                                                                                                                                                                                                                                                                                                     |               |                     |
| LEAF ORGANIZATION:                                                         | Not Preserved            | PETIOLE ATTACHMENT.:  | Not Preserved               |                                                                                                                                                                                                                                                                                                                                     |               |                     |
| BLADE SIZE:                                                                | Nanophyll-Mesophyll      | PETIOLE BASE:         | Not Preserved               |                                                                                                                                                                                                                                                                                                                                     |               |                     |
| BLADE SHAPE:                                                               | Ovate                    | PETIOLE GLANDS.:      | NP                          |                                                                                                                                                                                                                                                                                                                                     |               |                     |
| BLADE RATIO L:W:                                                           | 1:1                      | PETIOLE X-SECTION:    | NP                          |                                                                                                                                                                                                                                                                                                                                     |               |                     |
| LOBATION:                                                                  | Unlobed                  | MARGIN TYPE           | Untoothed                   |                                                                                                                                                                                                                                                                                                                                     |               |                     |
| BASE ASYMMETRY:                                                            | Symmetrical              | MEDIAL SYMMETRY:      | Symmetrical                 |                                                                                                                                                                                                                                                                                                                                     |               |                     |
| BASE SHAPE:                                                                | Concave                  | APEX SHAPE:           | Not preserved               | Special Margin Features:                                                                                                                                                                                                                                                                                                            | Not Preserved |                     |
| BASE ANGLE:                                                                | Acute                    | APEX ANGLE:           | Not preserved               | Terminal apex features:                                                                                                                                                                                                                                                                                                             | Not Preserved |                     |
| <b>PRIMARY &amp; SECONDARY VEIN FEATURES</b>                               |                          |                       |                             |                                                                                                                                                                                                                                                                                                                                     |               |                     |
| PRIMARY VENATION:                                                          | Basal actinodromous      |                       | NAKED BASAL VEINS:          | Absent                                                                                                                                                                                                                                                                                                                              |               |                     |
| MAJOR 2° Framework:                                                        | Eucamptodromous          |                       | N° BASAL VEINS:             | 3                                                                                                                                                                                                                                                                                                                                   | Interior 2°:  | Absent              |
| MAJOR 2° Attachment:                                                       | Decurrent                |                       | MINOR-2° Course:            | Semicraspedodromous                                                                                                                                                                                                                                                                                                                 |               |                     |
| MAJOR 2° SPACING:                                                          | Decreasing proximally    |                       | MAJOR 2° VEIN ANGLE:        | Uniform                                                                                                                                                                                                                                                                                                                             |               |                     |
| INTER-2° proximal course:                                                  |                          |                       | AGROPHIC VEINS:             | Simple                                                                                                                                                                                                                                                                                                                              |               |                     |
| INTER-2° distal course:                                                    |                          |                       | INTER-2° VEIN LENGTH:       |                                                                                                                                                                                                                                                                                                                                     |               |                     |
|                                                                            |                          |                       | INTER-2° FREQUENCY:         |                                                                                                                                                                                                                                                                                                                                     |               |                     |
| <b>TERTIARY VEIN FEATURES</b>                                              |                          |                       |                             |                                                                                                                                                                                                                                                                                                                                     |               |                     |
| INTERCOSTAL 3°:                                                            | Mixed opp/alt percurrent |                       | PERIMARGINAL VEINS:         | None                                                                                                                                                                                                                                                                                                                                |               |                     |
| EPIMEDIAL 3°:                                                              | Opposite percurrent      |                       | INTER-3° ANGLE TO 1°:       | Perpendicular to midvein                                                                                                                                                                                                                                                                                                            |               |                     |
| ADMEDIAL COURSE:                                                           | Perpendicular to midvein |                       | EXTERIOR 3° COURSE:         | Terminating at the margin                                                                                                                                                                                                                                                                                                           |               |                     |
| EXMEDIAL COURSE:                                                           | Basiflexed               |                       | INTERCOSTAL 3° VARIABILITY: | Decreasing exmedially                                                                                                                                                                                                                                                                                                               |               |                     |
| <b>FOURTH &amp; HIGHER ORDER VEIN FEATURES</b>                             |                          |                       |                             |                                                                                                                                                                                                                                                                                                                                     |               |                     |
| 4° VEIN FABRIC:                                                            | Alternate percurrent     |                       | VEINLETS -F/E/V/s:          | Not Preserved                                                                                                                                                                                                                                                                                                                       |               |                     |
| 5° VEIN FABRIC:                                                            | Irregular reticulate     |                       | TYPE OF F.E.V. BRANCHING:   | n.p                                                                                                                                                                                                                                                                                                                                 |               |                     |
| MARGINAL VENATION:                                                         | Not Preserved            |                       | F.E.V.s TERMINATIONS:       | Not Preserved                                                                                                                                                                                                                                                                                                                       |               |                     |
| AREOLATION:                                                                | Poorly developed         |                       | LEAF RANK:                  |                                                                                                                                                                                                                                                                                                                                     |               |                     |
| <b>TOOTH FEATURES</b>                                                      |                          |                       |                             |                                                                                                                                                                                                                                                                                                                                     |               |                     |
| ORDERS OF TEETH:                                                           |                          |                       | No TEETH/cm:                |                                                                                                                                                                                                                                                                                                                                     |               | TEETH GLANDULARITY: |
| TOOTH SHAPE:                                                               |                          |                       | TOOTH SPACING:              |                                                                                                                                                                                                                                                                                                                                     |               |                     |
| PRINCIPAL VEIN:                                                            |                          |                       | SINUS SHAPE:                |                                                                                                                                                                                                                                                                                                                                     |               |                     |
| ACCESSORY VEIN COURSE:                                                     |                          |                       | PRINCIPAL VEIN TERM.:       |                                                                                                                                                                                                                                                                                                                                     |               |                     |
| <b>NOTES</b>                                                               |                          |                       |                             |                                                                                                                                                                                                                                                                                                                                     |               |                     |
| Morphotype sheet completed using specimens: EC1508-1, 1704-44 and 1704-14C |                          |                       |                             |                                                                                                                                                                                                                                                                                                                                     |               |                     |

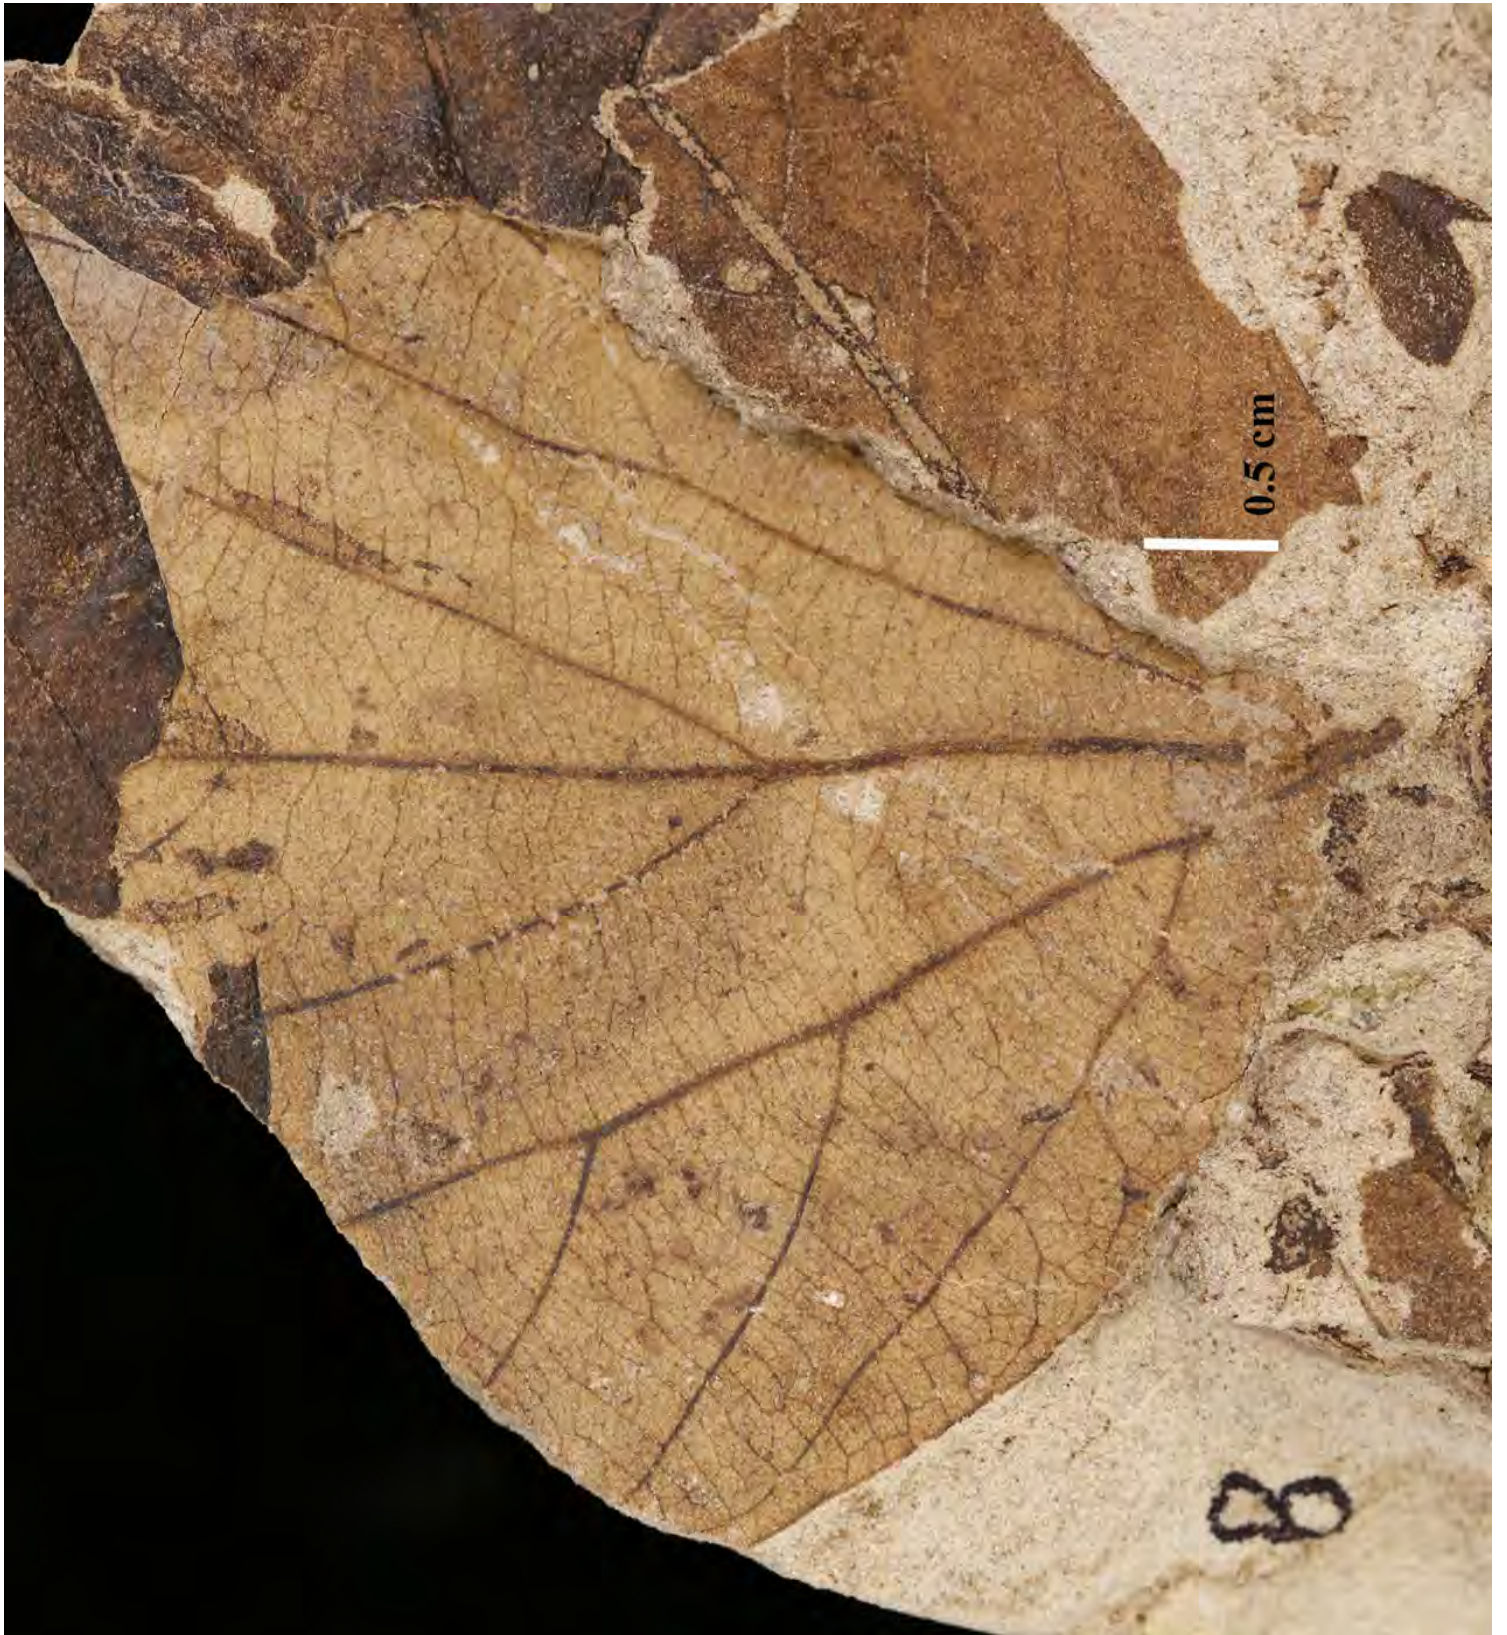



| MORPHOTYPE                                                                                                                                                                                 | HB179                                                       | NAME                                         |                        |
|--------------------------------------------------------------------------------------------------------------------------------------------------------------------------------------------|-------------------------------------------------------------|----------------------------------------------|------------------------|
| <b>GENERAL</b>                                                                                                                                                                             | MAJOR GROUP <u>DIC</u>                                      | INFERED FAMILY _____                         | ORGAN TYPE <u>Leaf</u> |
| EXEMPLAR LOC. <u>LAS 1714</u>                                                                                                                                                              | EXEMPLAR <u>1713-14</u>                                     | OTHERS LOC. <u>LAS 1713, LAS 1715</u>        |                        |
| DIAGNOSTIC FEATURES OF MORPHOTYPE <u>2° framework is strongly brochidodromous and the major vein angle decreases towards the base. This is unlike any other morphotype at these sites.</u> |                                                             |                                              |                        |
| <u>Lastly, the base is asymmetrical and the 5° vein fabric is freely ramifying .</u>                                                                                                       |                                                             |                                              |                        |
| MQI: _____                                                                                                                                                                                 |                                                             |                                              |                        |
| <b>LEAF ATTACHMENT, ORGANIZATION, SIZE, SHAPE AND PETIOLE FEATURES</b>                                                                                                                     |                                                             |                                              |                        |
| LEAF ATTACHMENT: <u>Petiolate</u>                                                                                                                                                          | LEAFLET ORGANIZATION: <u>Not Preserved</u>                  |                                              |                        |
| LEAF ARRANGEMENT: <u>Not Preserved</u>                                                                                                                                                     | LEAFLET ATTACHMENT: <u>np</u>                               |                                              |                        |
| LEAF ORGANIZATION: <u>Not Preserved</u>                                                                                                                                                    | PETIOLE ATTACHMENT.: <u>Not Preserved</u>                   |                                              |                        |
| BLADE SIZE: <u>Microphyl-Notophyll</u>                                                                                                                                                     | PETIOLE BASE: <u>Not Preserved</u>                          |                                              |                        |
| BLADE SHAPE: <u>Ovate</u>                                                                                                                                                                  | PETIOLE GLANDS.: <u>Not Preserved</u>                       |                                              |                        |
| BLADE RATIO L:W: <u>2:1</u>                                                                                                                                                                | PETIOLE X-SECTION: <u>Not Preserved</u>                     |                                              |                        |
| LOBATION: <u>Unlobed</u>                                                                                                                                                                   | MARGIN TYPE: <u>Untoothed</u>                               |                                              |                        |
| BASE ASYMMETRY: <u>Basal width asymmetrical</u>                                                                                                                                            | MEDIAL SYMMETRY: <u>Asymetrical</u>                         |                                              |                        |
| BASE SHAPE: <u>Concave</u>                                                                                                                                                                 | APEX SHAPE: <u>Acuminate</u>                                | Special Margin Features: <u>Sinuus</u>       |                        |
| BASE ANGLE: <u>Not Preserved</u>                                                                                                                                                           | APEX ANGLE: <u>Acute</u>                                    | Terminal apex features: <u>Not Preserved</u> |                        |
| <b>PRIMARY &amp; SECONDARY VEIN FEATURES</b>                                                                                                                                               |                                                             |                                              |                        |
| PRIMARY VENATION: <u>Pinnate</u>                                                                                                                                                           | NAKED BASAL VEINS: <u>Absent</u>                            |                                              |                        |
| MAJOR 2° Framework: <u>Simple brochidodromous</u>                                                                                                                                          | N° BASAL VEINS: <u>1</u>                                    | Interior 2°: <u>Absent</u>                   |                        |
| MAJOR 2° Attachment: <u>Decurrent</u>                                                                                                                                                      | MAJOR 2° VEIN ANGLE: <u>Smoothly decreasing toward base</u> | MINOR-2° Course: _____                       |                        |
| MAJOR 2° SPACING: <u>Gradually increasing proximally</u>                                                                                                                                   | AGROPHIC VEINS: <u>Absent</u>                               |                                              |                        |
| INTER-2° proximal course: _____                                                                                                                                                            | INTER-2° VEIN LENGTH: _____                                 |                                              |                        |
| INTER-2° distal course: _____                                                                                                                                                              | INTER-2° FREQUENCY: _____                                   |                                              |                        |
| <b>TERTIARY VEIN FEATURES</b>                                                                                                                                                              |                                                             |                                              |                        |
| INTERCOSTAL 3°: <u>Opposite percurrent - sinuous</u>                                                                                                                                       | PERIMARGINAL VEINS: <u>Not Preserved</u>                    |                                              |                        |
| EPIMEDIAL 3°: <u>Opposite percurrent</u>                                                                                                                                                   | INTER-3° ANGLE TO 1°: <u>Acute to midvein</u>               |                                              |                        |
| ADMEDIAL COURSE: <u>Not Preserved</u>                                                                                                                                                      | EXTERIOR 3° COURSE: <u>Not Preserved</u>                    |                                              |                        |
| EXMEDIAL COURSE: <u>Basiflexed</u>                                                                                                                                                         | INTERCOSTAL 3° VARIABILITY: <u>Not Preserved</u>            |                                              |                        |
| <b>FOURTH &amp; HIGHER ORDER VEIN FEATURES</b>                                                                                                                                             |                                                             |                                              |                        |
| 4° VEIN FABRIC: <u>Opposite percurrent</u>                                                                                                                                                 | VEINLETS -F/E/V/s: <u>Not Preserved</u>                     |                                              |                        |
| 5° VEIN FABRIC: <u>Freely ramifying</u>                                                                                                                                                    | TYPE OF F.E.V. BRANCHING: <u>n.p</u>                        |                                              |                        |
| MARGINAL VENATION: <u>Not Preserved</u>                                                                                                                                                    | F.E.V.s TERMINATIONS: <u>Not Preserved</u>                  |                                              |                        |
| AREOLATION: <u>Poorly developed</u>                                                                                                                                                        | LEAF RANK: _____                                            |                                              |                        |
| <b>TOOTH FEATURES</b>                                                                                                                                                                      |                                                             |                                              |                        |
| ORDERS OF TEETH: _____                                                                                                                                                                     | No TEETH/cm: _____                                          | TEETH GLANDULARITY: _____                    |                        |
| TOOTH SHAPE: _____                                                                                                                                                                         | TOOTH SPACING: _____                                        |                                              |                        |
| PRINCIPAL VEIN: _____                                                                                                                                                                      | SINUS SHAPE: _____                                          |                                              |                        |
| ACCESSORY VEIN COURSE: _____                                                                                                                                                               | PRINCIPAL VEIN TERM.: _____                                 |                                              |                        |
| <b>NOTES</b>                                                                                                                                                                               |                                                             |                                              |                        |
| Specimens used to complete morphosheet: 1701-97, 1713-1000 and 1713-14                                                                                                                     |                                                             |                                              |                        |

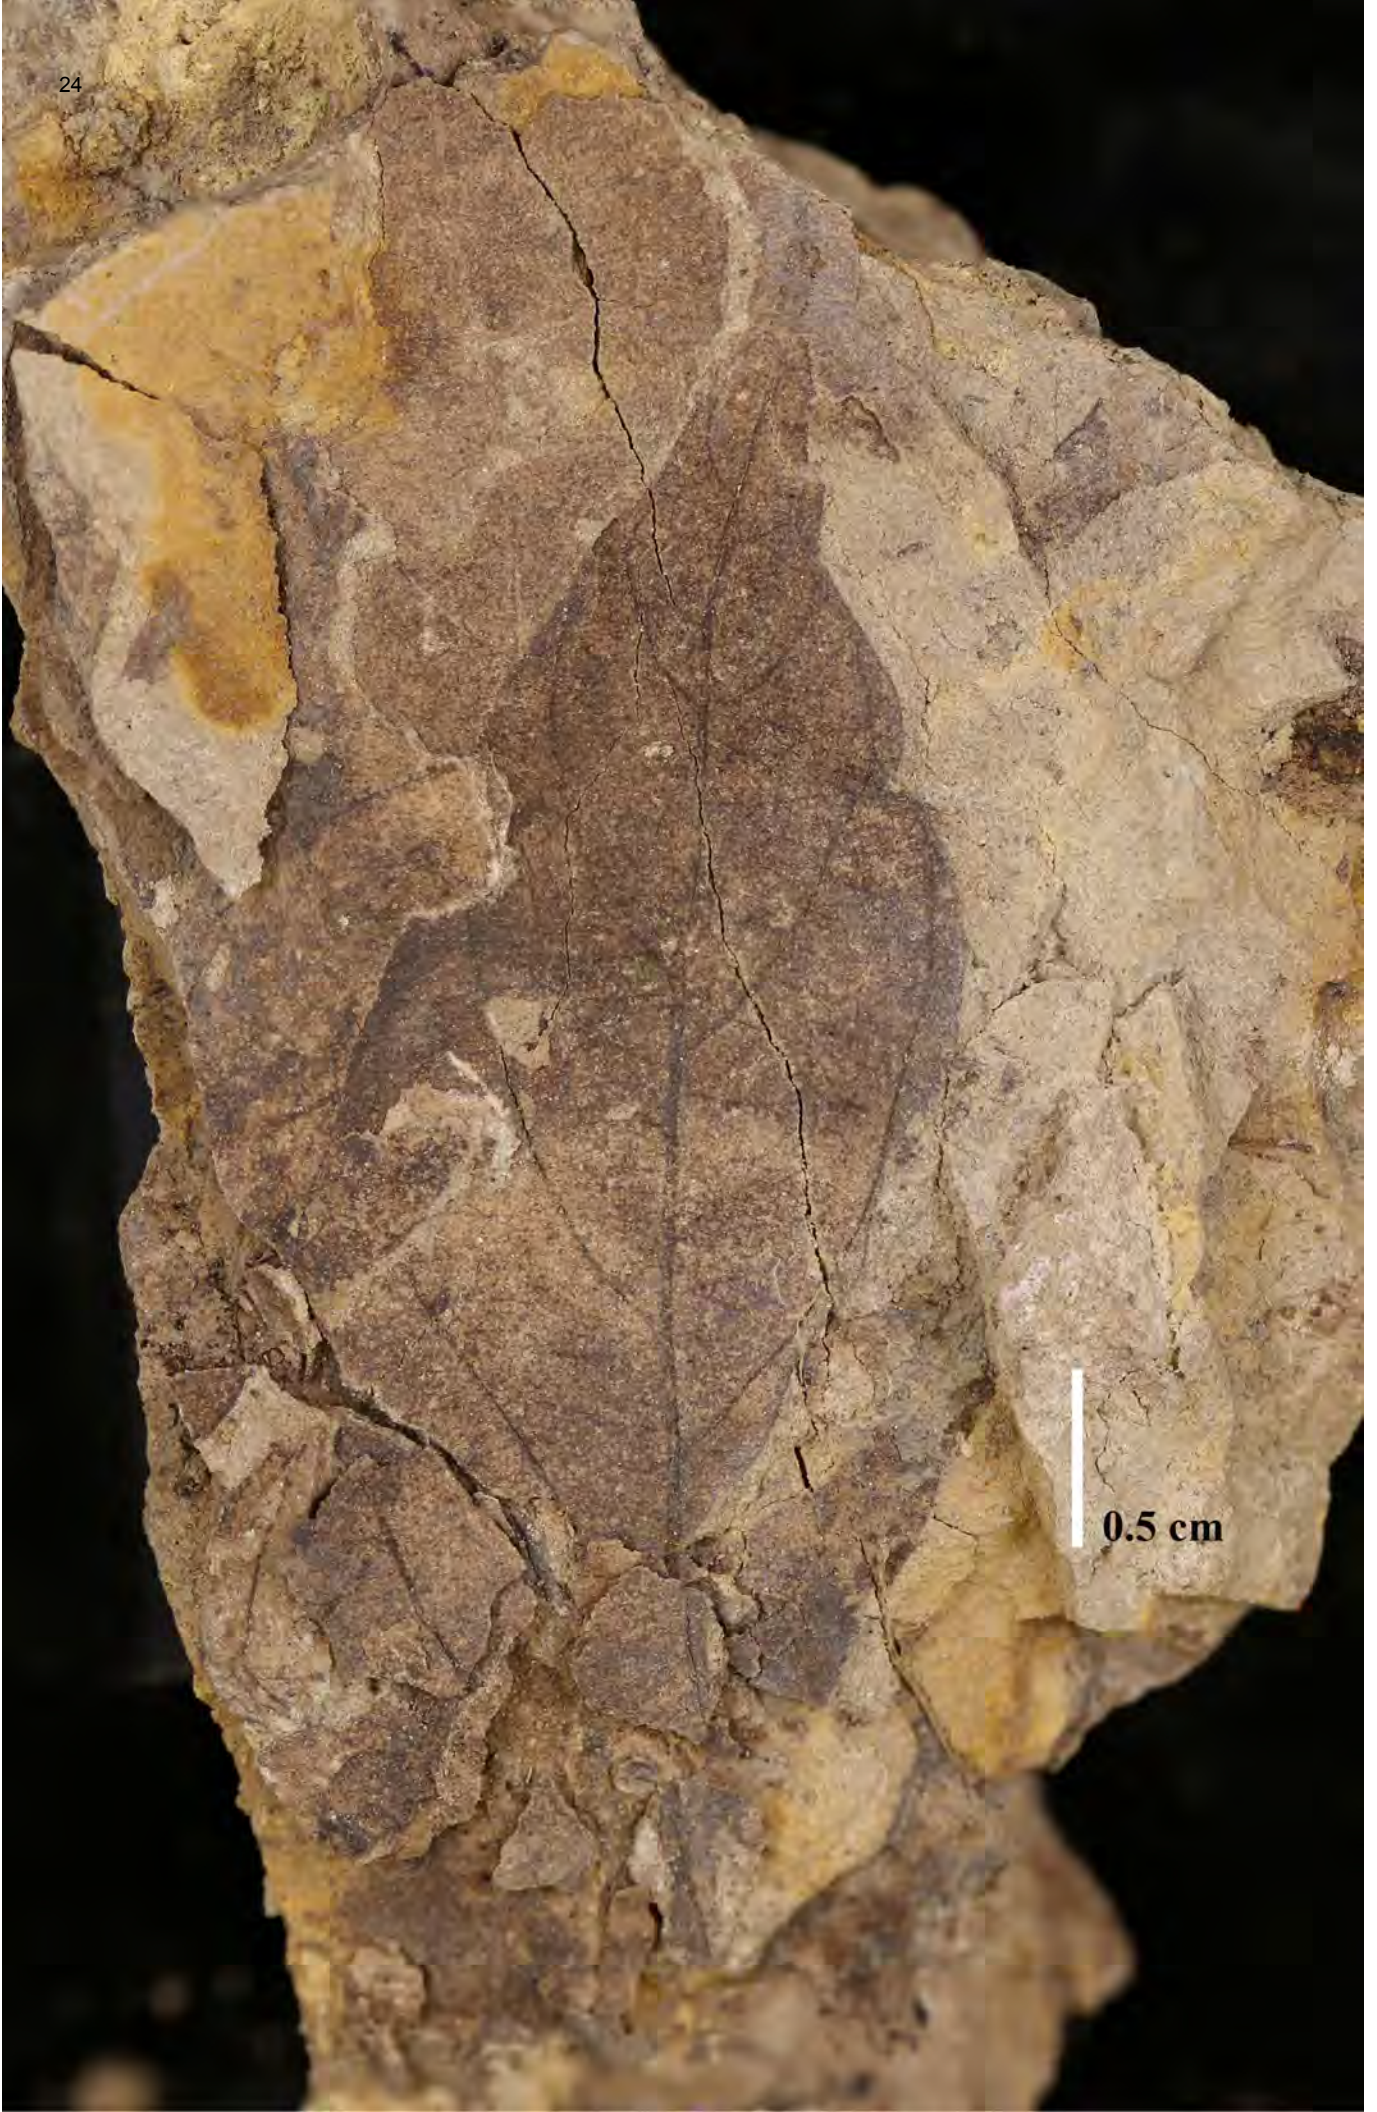

0.5 cm



| MORPHOTYPE                                                                                                                                                                                            | HB180                           | NAME                        |                                 |                          |               |
|-------------------------------------------------------------------------------------------------------------------------------------------------------------------------------------------------------|---------------------------------|-----------------------------|---------------------------------|--------------------------|---------------|
| <b>GENERAL</b>                                                                                                                                                                                        | MAJOR GROUP                     | DIC                         | INFERED FAMILY                  | ORGAN TYPE               | Leaf          |
| EXEMPLAR LOC.                                                                                                                                                                                         | LAS 1701                        | EXEMPLAR                    | 1701-45                         | OTHERS LOC.              | LAS 1713      |
| <b>DIAGNOSTIC FEATURES OF MORPHOTYPE</b>                                                                                                                                                              |                                 |                             |                                 |                          |               |
| Weakly brochidodromous and eucamptodromous however, the 3° are opposite percurrent-straight and obtuse to midvein. Also the 2° spacing gradually increases proximally and is acute compared to HB176. |                                 |                             |                                 |                          |               |
| MQI: _____                                                                                                                                                                                            |                                 |                             |                                 |                          |               |
| <b>LEAF ATTACHMENT, ORGANIZATION, SIZE, SHAPE AND PETIOLE FEATURES</b>                                                                                                                                |                                 |                             |                                 |                          |               |
| LEAF ATTACHMENT:                                                                                                                                                                                      | Petiolate                       | LEAFLET ORGANIZATION:       | Not Preserved                   |                          |               |
| LEAF ARRANGEMENT:                                                                                                                                                                                     | Not Preserved                   | LEAFLET ATTACHMENT:         | np                              |                          |               |
| LEAF ORGANIZATION:                                                                                                                                                                                    | Not Preserved                   | PETIOLE ATTACHMENT.:        | Not Preserved                   |                          |               |
| BLADE SIZE:                                                                                                                                                                                           | Microphyll-Mesophyll            | PETIOLE BASE:               | Not Preserved                   |                          |               |
| BLADE SHAPE:                                                                                                                                                                                          | Ovate                           | PETIOLE GLANDS.:            | Not Preserved                   |                          |               |
| BLADE RATIO L:W:                                                                                                                                                                                      | 2:1                             | PETIOLE X-SECTION:          | Not Preserved                   |                          |               |
| LOBATION:                                                                                                                                                                                             | Unlobed                         | MARGIN TYPE                 | Untoothed                       |                          |               |
| BASE ASYMMETRY:                                                                                                                                                                                       | Symmetrical                     | MEDIAL SYMMETRY:            | Symmetrical                     |                          |               |
| BASE SHAPE:                                                                                                                                                                                           | Convex                          | APEX SHAPE:                 | Not preserved                   | Special Margin Features: | Not Preserved |
| BASE ANGLE:                                                                                                                                                                                           | Acute                           | APEX ANGLE:                 | Not preserved                   | Terminal apex features:  | Not Preserved |
| <b>PRIMARY &amp; SECONDARY VEIN FEATURES</b>                                                                                                                                                          |                                 |                             |                                 |                          |               |
| PRIMARY VENATION:                                                                                                                                                                                     | Pinnate                         | NAKED BASAL VEINS:          | Not Preserved                   |                          |               |
| MAJOR 2° Framework:                                                                                                                                                                                   | Mixed framework                 | N° BASAL VEINS:             | 1                               | Interior 2°:             | Absent        |
| MAJOR 2° Attachment:                                                                                                                                                                                  | Decurrent                       | MINOR-2° Course:            |                                 |                          |               |
| MAJOR 2° SPACING:                                                                                                                                                                                     | Gradually increasing proximally | MAJOR 2° VEIN ANGLE:        | Smoothly increasing toward base |                          |               |
|                                                                                                                                                                                                       |                                 | AGROPHIC VEINS:             | Absent                          |                          |               |
| INTER-2° proximal course:                                                                                                                                                                             |                                 | INTER-2° VEIN LENGTH:       |                                 |                          |               |
| INTER-2° distal course:                                                                                                                                                                               |                                 | INTER-2° FREQUENCY:         |                                 |                          |               |
| <b>TERTIARY VEIN FEATURES</b>                                                                                                                                                                         |                                 |                             |                                 |                          |               |
| INTERCOSTAL 3°:                                                                                                                                                                                       | Opposite percurrent - straight  | PERIMARGINAL VEINS:         | Not Preserved                   |                          |               |
| EPIMEDIAL 3°:                                                                                                                                                                                         | Opposite percurrent             | INTER-3° ANGLE TO 1°:       | Obtuse to midvein               |                          |               |
| ADMEDIAL COURSE:                                                                                                                                                                                      | Not Preserved                   | EXTERIOR 3° COURSE:         | Not Preserved                   |                          |               |
| EXMEDIAL COURSE:                                                                                                                                                                                      | Not Preserved                   | INTERCOSTAL 3° VARIABILITY: | Consistent                      |                          |               |
| <b>FOURTH &amp; HIGHER ORDER VEIN FEATURES</b>                                                                                                                                                        |                                 |                             |                                 |                          |               |
| 4° VEIN FABRIC:                                                                                                                                                                                       | Not Preserved                   | VEINLETS -F/E/V/s:          | Not Preserved                   |                          |               |
| 5° VEIN FABRIC:                                                                                                                                                                                       | Not Preserved                   | TYPE OF F.E.V. BRANCHING:   | n.p                             |                          |               |
| MARGINAL VENATION:                                                                                                                                                                                    | Not Preserved                   | F.E.V.s TERMINATIONS:       | Not Preserved                   |                          |               |
| AREOLATION:                                                                                                                                                                                           | Not Preserved                   | LEAF RANK:                  |                                 |                          |               |
| <b>TOOTH FEATURES</b>                                                                                                                                                                                 |                                 |                             |                                 |                          |               |
| ORDERS OF TEETH:                                                                                                                                                                                      |                                 | No TEETH/cm:                |                                 | TEETH GLANDULARITY:      |               |
| TOOTH SHAPE:                                                                                                                                                                                          |                                 | TOOTH SPACING:              |                                 |                          |               |
| PRINCIPAL VEIN:                                                                                                                                                                                       |                                 | SINUS SHAPE:                |                                 |                          |               |
| ACCESSORY VEIN COURSE:                                                                                                                                                                                |                                 | PRINCIPAL VEIN TERM.:       |                                 |                          |               |
| <b>NOTES</b>                                                                                                                                                                                          |                                 |                             |                                 |                          |               |
| Specimen used to complete morphosheet is: 1701-45                                                                                                                                                     |                                 |                             |                                 |                          |               |



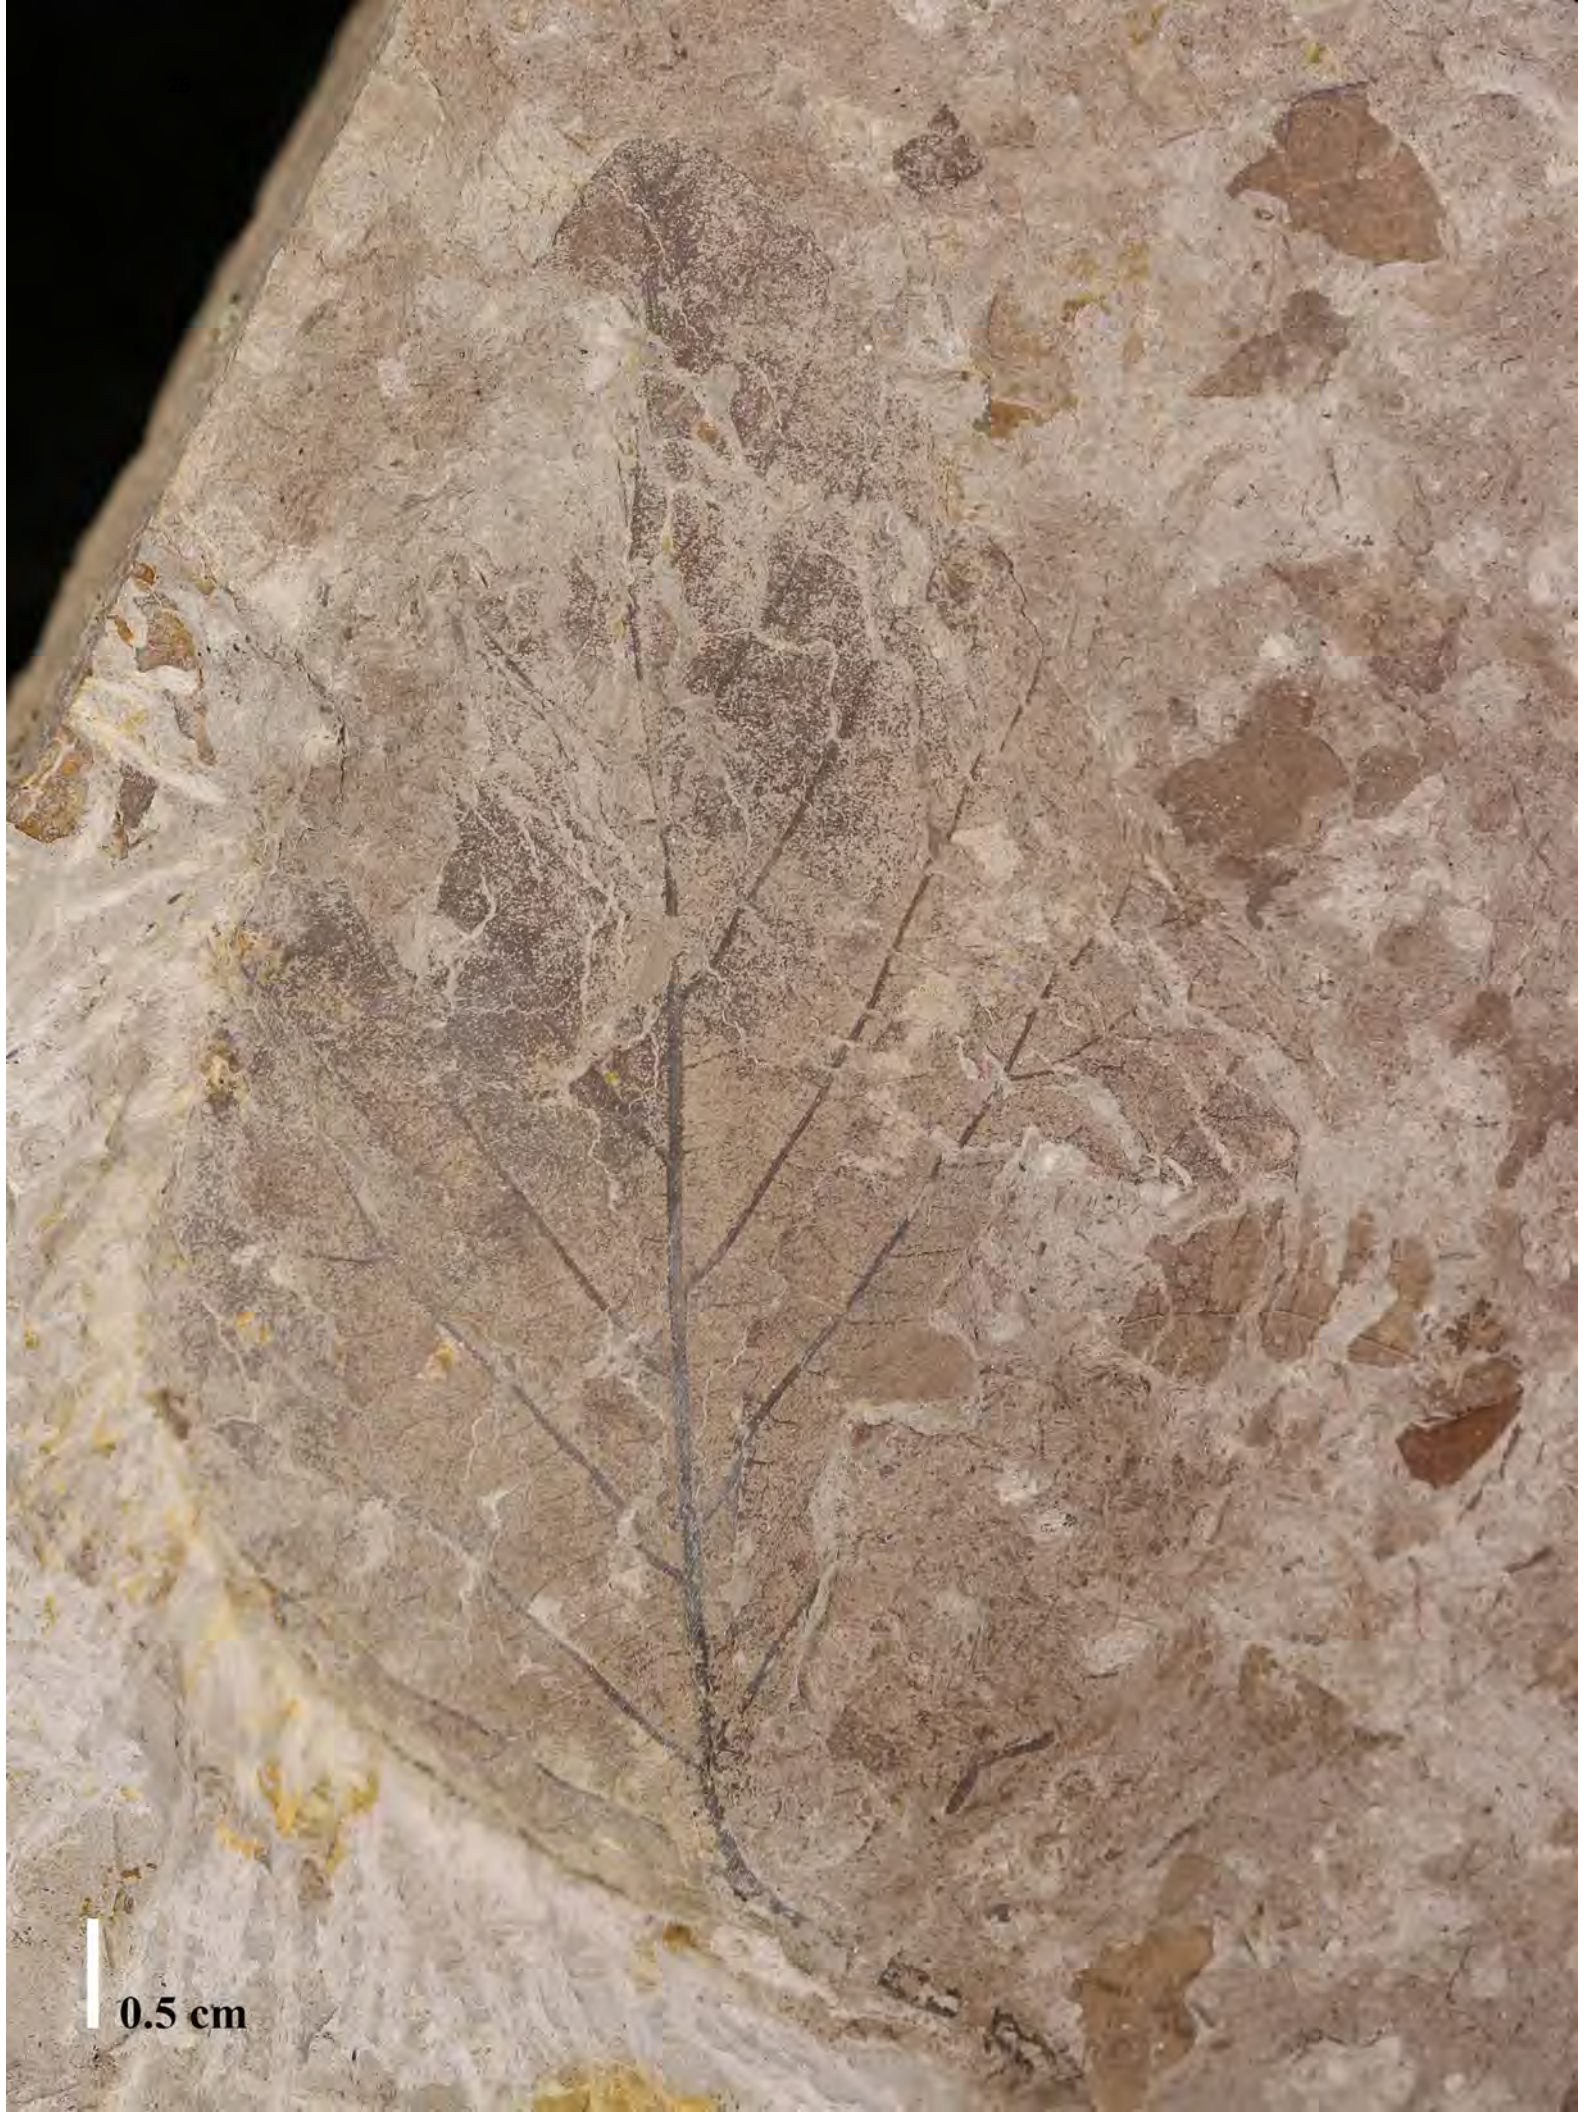

0.5 cm



| MORPHOTYPE                                                                                   | HB181                                            | NAME                                          |                        |
|----------------------------------------------------------------------------------------------|--------------------------------------------------|-----------------------------------------------|------------------------|
| <b>GENERAL</b>                                                                               | MAJOR GROUP <u>DIC</u>                           | INFERED FAMILY _____                          | ORGAN TYPE <u>Leaf</u> |
| EXEMPLAR LOC. <u>1704</u>                                                                    | EXEMPLAR <u>1704-13C</u>                         | OTHERS LOC. _____                             |                        |
| <b>DIAGNOSTIC FEATURES OF MORPHOTYPE</b>                                                     |                                                  |                                               |                        |
| <u>Very poorly preserved however, interesting morphology!</u>                                |                                                  |                                               |                        |
| <u>4 primary veins preserved and agrophic veins however no other features are preserved.</u> |                                                  |                                               |                        |
| <u>Due to the primary veins, this leaf can not be put in any other morphospecies.</u>        |                                                  |                                               |                        |
|                                                                                              |                                                  |                                               | MQI: _____             |
| <b>LEAF ATTACHMENT, ORGANIZATION, SIZE, SHAPE AND PETIOLE FEATURES</b>                       |                                                  |                                               |                        |
| LEAF ATTACHMENT: <u>Not Preserved</u>                                                        | LEAFLET ORGANIZATION: <u>Not Preserved</u>       |                                               |                        |
| LEAF ARRANGEMENT: <u>Not Preserved</u>                                                       | LEAFLET ATTACHMENT: <u>np</u>                    |                                               |                        |
| LEAF ORGANIZATION: <u>Not Preserved</u>                                                      | PETIOLE ATTACHMENT.: <u>Not Preserved</u>        |                                               |                        |
| BLADE SIZE: <u>Notophyll</u>                                                                 | PETIOLE BASE: <u>Not Preserved</u>               |                                               |                        |
| BLADE SHAPE: <u>Not Preserved</u>                                                            | PETIOLE GLANDS.: <u>Not Preserved</u>            |                                               |                        |
| BLADE RATIO L:W: <u>Not Preserved</u>                                                        | PETIOLE X-SECTION: <u>Not Preserved</u>          |                                               |                        |
| LOBATION: <u>Not Preserved</u>                                                               | MARGIN TYPE: <u>Untoothed</u>                    |                                               |                        |
| BASE ASYMMETRY: <u>Not Preserved</u>                                                         | MEDIAL SYMMETRY: <u>Not Preserved</u>            |                                               |                        |
| BASE SHAPE: <u>Not Preserved</u>                                                             | APEX SHAPE: <u>Not preserved</u>                 | Special Margin Features: <u>Not Preserved</u> |                        |
| BASE ANGLE: <u>Not Preserved</u>                                                             | APEX ANGLE: <u>Not preserved</u>                 | Terminal apex features: <u>Not Preserved</u>  |                        |
| <b>PRIMARY &amp; SECONDARY VEIN FEATURES</b>                                                 |                                                  |                                               |                        |
| PRIMARY VENATION: <u>Some kind of Palmate</u>                                                | NAKED BASAL VEINS: <u>Not Preserved</u>          |                                               |                        |
| MAJOR 2° Framework: <u>Semicraspedodromous</u>                                               | N° BASAL VEINS: <u>4</u>                         | Interior 2°: <u>NP</u>                        |                        |
| MAJOR 2° Attachment: <u>Decurrent</u>                                                        | MINOR-2° Course: <u>Not Preserved</u>            |                                               |                        |
| MAJOR 2° SPACING: <u>Not Preserved</u>                                                       | MAJOR 2° VEIN ANGLE: <u>Not Preserved</u>        |                                               |                        |
|                                                                                              | AGROPHIC VEINS: <u>Simple</u>                    |                                               |                        |
| INTER-2° proximal course: _____                                                              | INTER-2° VEIN LENGTH: _____                      |                                               |                        |
| INTER-2° distal course: _____                                                                | INTER-2° FREQUENCY: _____                        |                                               |                        |
| <b>TERTIARY VEIN FEATURES</b>                                                                |                                                  |                                               |                        |
| INTERCOSTAL 3°: <u>Not Preserved</u>                                                         | PERIMARGINAL VEINS: <u>Not Preserved</u>         |                                               |                        |
| EPIMEDIAL 3°: <u>Not preserved</u>                                                           | INTER-3° ANGLE TO 1°: <u>Not Preserved</u>       |                                               |                        |
| ADMEDIAL COURSE: <u>Not Preserved</u>                                                        | EXTERIOR 3° COURSE: <u>Not Preserved</u>         |                                               |                        |
| EXMEDIAL COURSE: <u>Not Preserved</u>                                                        | INTERCOSTAL 3° VARIABILITY: <u>Not Preserved</u> |                                               |                        |
| <b>FOURTH &amp; HIGHER ORDER VEIN FEATURES</b>                                               |                                                  |                                               |                        |
| 4° VEIN FABRIC: <u>Not Preserved</u>                                                         | VEINLETS -F/E/V/s: <u>Not Preserved</u>          |                                               |                        |
| 5° VEIN FABRIC: <u>Not Preserved</u>                                                         | TYPE OF F.E.V. BRANCHING: <u>n.p</u>             |                                               |                        |
| MARGINAL VENATION: <u>Not Preserved</u>                                                      | F.E.V.s TERMINATIONS: <u>Not Preserved</u>       |                                               |                        |
| AREOLATION: <u>Not Preserved</u>                                                             | LEAF RANK: _____                                 |                                               |                        |
| <b>TOOTH FEATURES</b>                                                                        |                                                  |                                               |                        |
| ORDERS OF TEETH: _____                                                                       | No TEETH/cm: _____                               | TEETH GLANDULARITY: _____                     |                        |
| TOOTH SHAPE: _____                                                                           | TOOTH SPACING: _____                             |                                               |                        |
| PRINCIPAL VEIN: _____                                                                        | SINUS SHAPE: _____                               |                                               |                        |
| ACCESSORY VEIN COURSE: _____                                                                 | PRINCIPAL VEIN TERM.: _____                      |                                               |                        |
| <b>NOTES</b>                                                                                 |                                                  |                                               |                        |
| Specimen used to complete morphosheet: 1704-13C                                              |                                                  |                                               |                        |



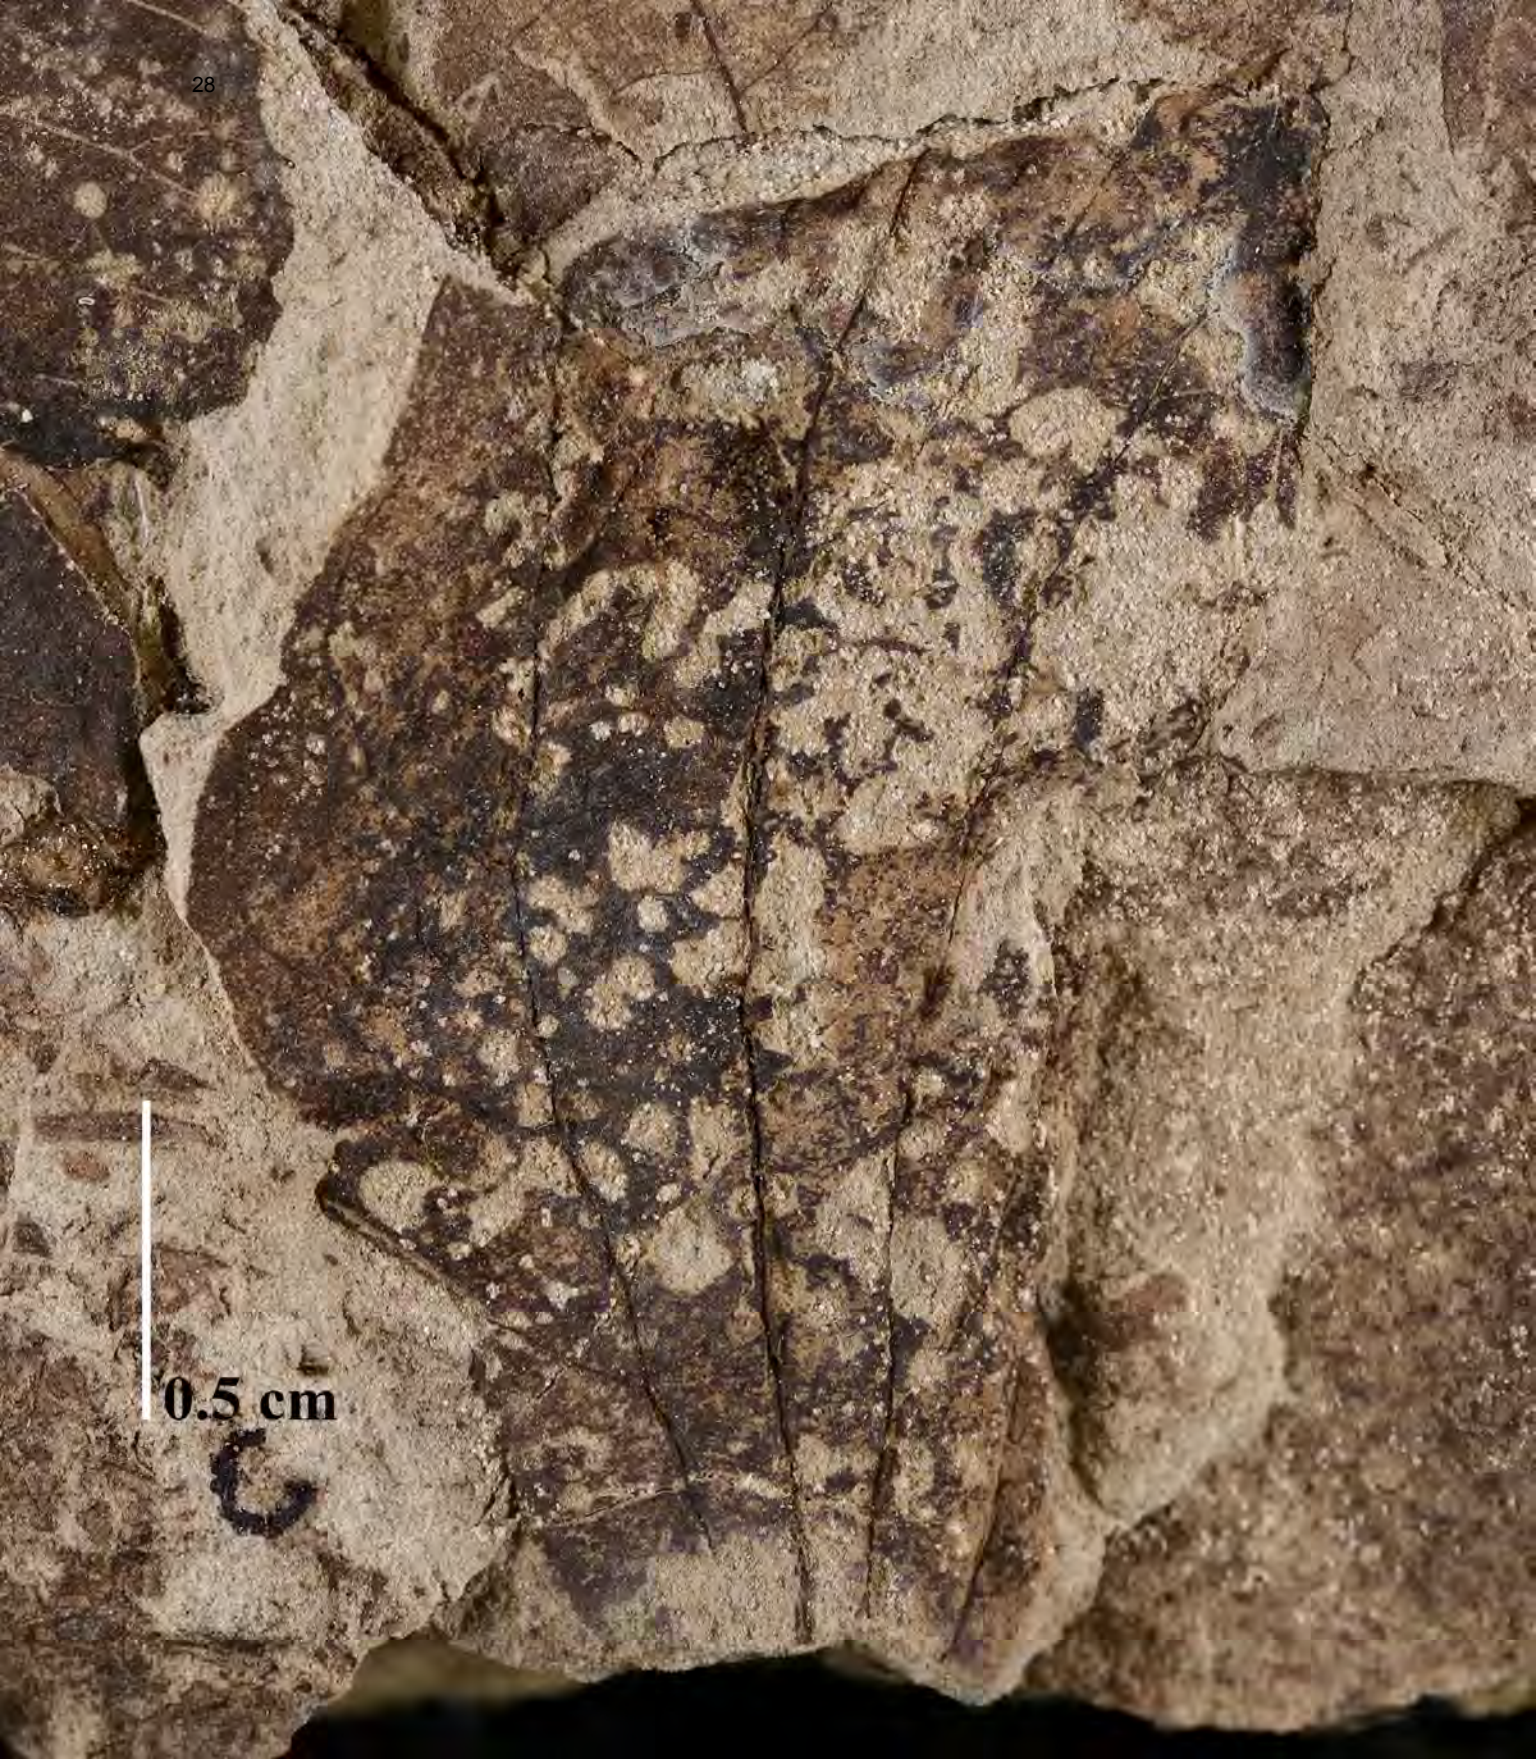

0.5 cm



| MORPHOTYPE                                                                                                                         | HB182                    | NAME     |                             |                                 |                    |
|------------------------------------------------------------------------------------------------------------------------------------|--------------------------|----------|-----------------------------|---------------------------------|--------------------|
| <b>GENERAL</b>                                                                                                                     | MAJOR GROUP              | DIC      | INFERED FAMILY              | ORGAN TYPE                      | Leaf               |
| EXEMPLAR LOC.                                                                                                                      | 1710                     | EXEMPLAR | 1710-26                     | OTHERS LOC.                     |                    |
| <b>DIAGNOSTIC FEATURES OF MORPHOTYPE</b>                                                                                           |                          |          |                             |                                 |                    |
| Very regularly spaced 2° veins with consistent acute angles and the framework is eucamptodromous. The acute angel measures at 30°. |                          |          |                             |                                 |                    |
| MQI: _____                                                                                                                         |                          |          |                             |                                 |                    |
| <b>LEAF ATTACHMENT, ORGANIZATION, SIZE, SHAPE AND PETIOLE FEATURES</b>                                                             |                          |          |                             |                                 |                    |
| LEAF ATTACHMENT:                                                                                                                   | Not Preserved            |          | LEAFLET ORGANIZATION:       | Not Preserved                   |                    |
| LEAF ARRANGEMENT:                                                                                                                  | Not Preserved            |          | LEAFLET ATTACHMENT:         | np                              |                    |
| LEAF ORGANIZATION:                                                                                                                 | Not Preserved            |          | PETIOLE ATTACHMENT.:        | Not Preserved                   |                    |
| BLADE SIZE:                                                                                                                        | Microphyll-Mesophyll     |          | PETIOLE BASE:               | Not Preserved                   |                    |
| BLADE SHAPE:                                                                                                                       | Ovate                    |          | PETIOLE GLANDS.:            | Not Preserved                   |                    |
| BLADE RATIO L:W:                                                                                                                   | 2:1                      |          | PETIOLE X-SECTION:          | Not Preserved                   |                    |
| LOBATION:                                                                                                                          | Unlobed                  |          | MARGIN TYPE                 | Untoothed                       |                    |
| BASE ASYMMETRY:                                                                                                                    | Not Preserved            |          | MEDIAL SYMMETRY:            | Symmetrical                     |                    |
| BASE SHAPE:                                                                                                                        | Not Preserved            |          | APEX SHAPE:                 | Acuminate                       |                    |
| BASE ANGLE:                                                                                                                        | Not Preserved            |          | APEX ANGLE:                 | Acute                           |                    |
|                                                                                                                                    |                          |          | Special Margin Features:    | Not Preserved                   |                    |
|                                                                                                                                    |                          |          | Terminal apex features:     | Not Preserved                   |                    |
| <b>PRIMARY &amp; SECONDARY VEIN FEATURES</b>                                                                                       |                          |          |                             |                                 |                    |
| PRIMARY VENATION:                                                                                                                  | Pinnate                  |          | NAKED BASAL VEINS:          | Not Preserved                   |                    |
| MAJOR 2° Framework:                                                                                                                | Eucamptodromous          |          | N° BASAL VEINS:             | 1                               | Interior 2° Absent |
| MAJOR 2° Attachment:                                                                                                               | Decurrent                |          | MINOR-2° Course:            |                                 |                    |
| MAJOR 2° SPACING:                                                                                                                  | Regular                  |          | MAJOR 2° VEIN ANGLE:        | Smoothly increasing toward base |                    |
|                                                                                                                                    |                          |          | AGROPHIC VEINS:             | Absent                          |                    |
| INTER-2° proximal course:                                                                                                          |                          |          | INTER-2° VEIN LENGTH:       |                                 |                    |
| INTER-2° distal course:                                                                                                            |                          |          | INTER-2° FREQUENCY:         |                                 |                    |
| <b>TERTIARY VEIN FEATURES</b>                                                                                                      |                          |          |                             |                                 |                    |
| INTERCOSTAL 3°:                                                                                                                    | Mixed opp/alt percurrent |          | PERIMARGINAL VEINS:         | Not Preserved                   |                    |
| EPIMEDIAL 3°:                                                                                                                      | Mixed opp/alt percurrent |          | INTER-3° ANGLE TO 1°:       | Acute to midvein                |                    |
| ADMEDIAL COURSE:                                                                                                                   | Perpendicular to midvein |          | EXTERIOR 3° COURSE:         | Not Preserved                   |                    |
| EXMEDIAL COURSE:                                                                                                                   | Basiflexed               |          | INTERCOSTAL 3° VARIABILITY: | Consistent                      |                    |
| <b>FOURTH &amp; HIGHER ORDER VEIN FEATURES</b>                                                                                     |                          |          |                             |                                 |                    |
| 4° VEIN FABRIC:                                                                                                                    | Mixed percurrent         |          | VEINLETS -F/E/V/s:          | Not Preserved                   |                    |
| 5° VEIN FABRIC:                                                                                                                    | Regular reticulate       |          | TYPE OF F.E.V. BRANCHING:   | n.p                             |                    |
| MARGINAL VENATION:                                                                                                                 | Not Preserved            |          | F.E.V.s TERMINATIONS:       | Not Preserved                   |                    |
| AREOLATION:                                                                                                                        | Well developed           |          | LEAF RANK:                  |                                 |                    |
| <b>TOOTH FEATURES</b>                                                                                                              |                          |          |                             |                                 |                    |
| ORDERS OF TEETH:                                                                                                                   |                          |          | No TEETH/cm:                |                                 |                    |
| TOOTH SHAPE:                                                                                                                       |                          |          | TEETH GLANDULARITY:         |                                 |                    |
| PRINCIPAL VEIN:                                                                                                                    |                          |          | TOOTH SPACING:              |                                 |                    |
|                                                                                                                                    |                          |          | SINUS SHAPE:                |                                 |                    |
| ACCESSORY VEIN COURSE:                                                                                                             |                          |          | PRINCIPAL VEIN TERM.:       |                                 |                    |
| <b>NOTES</b>                                                                                                                       |                          |          |                             |                                 |                    |
| Specimens used to complete morphotype sheet: 1710-6B and 1710-207                                                                  |                          |          |                             |                                 |                    |

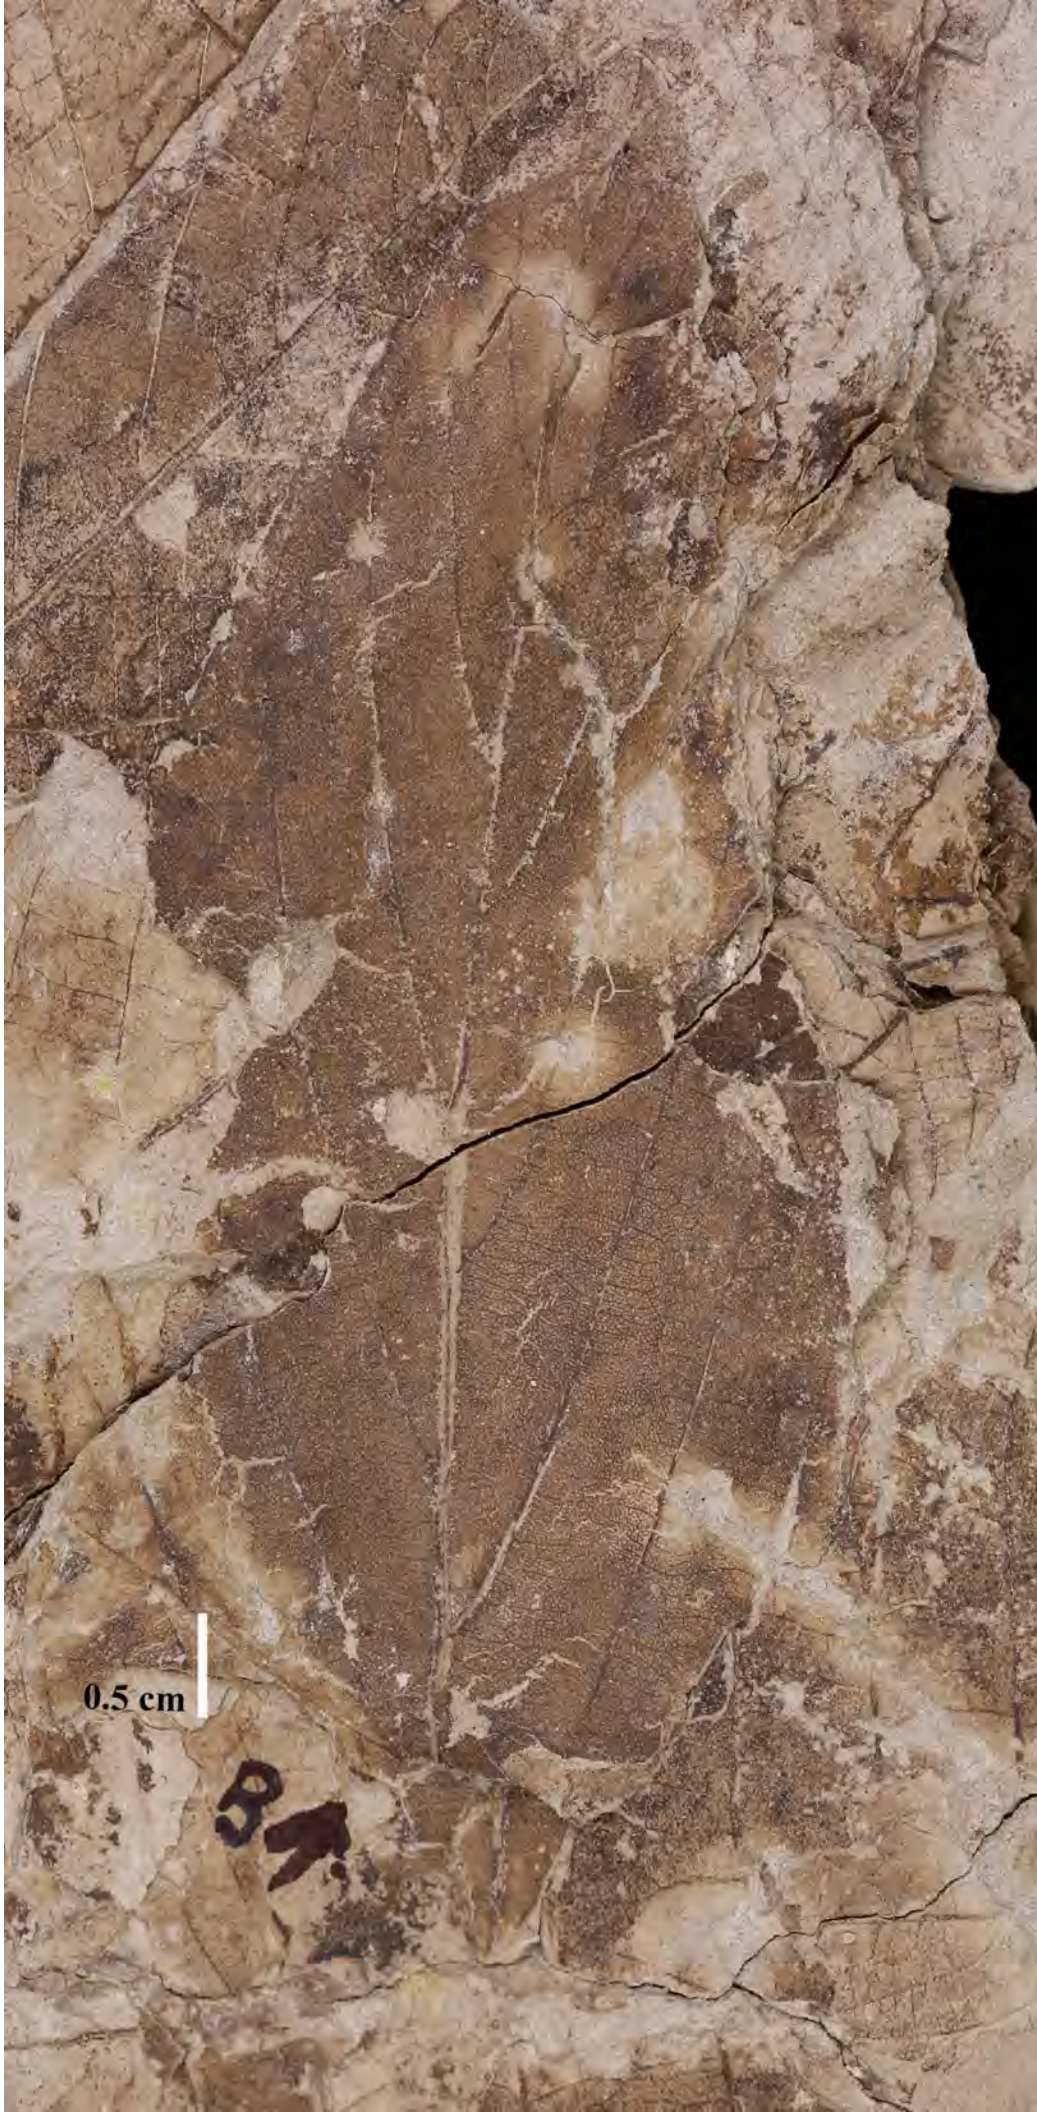

0.5 cm

87



| MORPHOTYPE                                                                                                                                                                                                                                                            | HB183                                                | NAME                                          |                        |
|-----------------------------------------------------------------------------------------------------------------------------------------------------------------------------------------------------------------------------------------------------------------------|------------------------------------------------------|-----------------------------------------------|------------------------|
| <b>GENERAL</b>                                                                                                                                                                                                                                                        | MAJOR GROUP <u>DIC</u>                               | INFERED FAMILY _____                          | ORGAN TYPE <u>Leaf</u> |
| EXEMPLAR LOC. <u>LAS 1701</u>                                                                                                                                                                                                                                         | EXEMPLAR <u>1704-47A</u>                             | OTHERS LOC. <u>LAS 1706</u>                   |                        |
| <b>DIAGNOSTIC FEATURES OF MORPHOTYPE</b>                                                                                                                                                                                                                              |                                                      |                                               |                        |
| <u>Thick petiole and midvein that decreases in width apically.</u>                                                                                                                                                                                                    |                                                      |                                               |                        |
| <u>Midevein at base is 2x thicker than at apex. Unlike Averrhoites, HB183 doesn't have intersec 2° veins and the preservation on this morphotype is superior to Averrhoites. The 2° framewo is weakly brochidodromous with irregular spacing throughout the leaf.</u> |                                                      |                                               |                        |
| MQI: _____                                                                                                                                                                                                                                                            |                                                      |                                               |                        |
| <b>LEAF ATTACHMENT, ORGANIZATION, SIZE, SHAPE AND PETIOLE FEATURES</b>                                                                                                                                                                                                |                                                      |                                               |                        |
| LEAF ATTACHMENT: <u>Petiolate</u>                                                                                                                                                                                                                                     | LEAFLET ORGANIZATION: <u>Not Preserved</u>           |                                               |                        |
| LEAF ARRANGEMENT: <u>Not Preserved</u>                                                                                                                                                                                                                                | LEAFLET ATTACHMENT: <u>np</u>                        |                                               |                        |
| LEAF ORGANIZATION: <u>Not Preserved</u>                                                                                                                                                                                                                               | PETIOLE ATTACHMENT.: <u>Not Preserved</u>            |                                               |                        |
| BLADE SIZE: <u>Microphyll-Mesophyll</u>                                                                                                                                                                                                                               | PETIOLE BASE: <u>Not Preserved</u>                   |                                               |                        |
| BLADE SHAPE: <u>Elliptic</u>                                                                                                                                                                                                                                          | PETIOLE GLANDS.: <u>Not Preserved</u>                |                                               |                        |
| BLADE RATIO L:W: <u>2:1</u>                                                                                                                                                                                                                                           | PETIOLE X-SECTION: <u>Not Preserved</u>              |                                               |                        |
| LOBATION: <u>Unlobed</u>                                                                                                                                                                                                                                              | MARGIN TYPE: <u>Untoothed</u>                        |                                               |                        |
| BASE ASYMMETRY: <u>Basal width asymmetrical</u>                                                                                                                                                                                                                       | MEDIAL SYMMETRY: <u>Symmetrical</u>                  |                                               |                        |
| BASE SHAPE: <u>Concave</u>                                                                                                                                                                                                                                            | APEX SHAPE: <u>Not preserved</u>                     | Special Margin Features: <u>Not Preserved</u> |                        |
| BASE ANGLE: <u>Acute</u>                                                                                                                                                                                                                                              | APEX ANGLE: <u>Not preserved</u>                     | Terminal apex features: <u>Not Preserved</u>  |                        |
| <b>PRIMARY &amp; SECONDARY VEIN FEATURES</b>                                                                                                                                                                                                                          |                                                      |                                               |                        |
| PRIMARY VENATION: <u>Pinnate</u>                                                                                                                                                                                                                                      | NAKED BASAL VEINS: <u>Not Preserved</u>              |                                               |                        |
| MAJOR 2° Framework: <u>Simple brochidodromous</u>                                                                                                                                                                                                                     | N° BASAL VEINS: <u>1</u>                             | Interior 2°: <u>Absent</u>                    |                        |
| MAJOR 2° Attachment: <u>Decurrent</u>                                                                                                                                                                                                                                 | MAJOR 2° VEIN ANGLE: <u>Inconsistent</u>             | MINOR-2° Course: _____                        |                        |
| MAJOR 2° SPACING: <u>Irregular</u>                                                                                                                                                                                                                                    | AGROPHIC VEINS: <u>Absent</u>                        |                                               |                        |
| INTER-2° proximal course: _____                                                                                                                                                                                                                                       | INTER-2° VEIN LENGTH: _____                          |                                               |                        |
| INTER-2° distal course: _____                                                                                                                                                                                                                                         | INTER-2° FREQUENCY: _____                            |                                               |                        |
| <b>TERTIARY VEIN FEATURES</b>                                                                                                                                                                                                                                         |                                                      |                                               |                        |
| INTERCOSTAL 3°: <u>Opposite percurrent - convex</u>                                                                                                                                                                                                                   | PERIMARGINAL VEINS: <u>None</u>                      |                                               |                        |
| EPIMEDIAL 3°: <u>Opposite percurrent</u>                                                                                                                                                                                                                              | INTER-3° ANGLE TO 1°: <u>Acute to midvein</u>        |                                               |                        |
| ADMEDIAL COURSE: <u>Acute to midvein</u>                                                                                                                                                                                                                              | EXTERIOR 3° COURSE: <u>Terminating at the margin</u> |                                               |                        |
| EXMEDIAL COURSE: <u>Basiflexed</u>                                                                                                                                                                                                                                    | INTERCOSTAL 3° VARIABILITY: <u>Inconsistent</u>      |                                               |                        |
| <b>FOURTH &amp; HIGHER ORDER VEIN FEATURES</b>                                                                                                                                                                                                                        |                                                      |                                               |                        |
| 4° VEIN FABRIC: <u>Not Preserved</u>                                                                                                                                                                                                                                  | VEINLETS -F/E/V/s: <u>Not Preserved</u>              |                                               |                        |
| 5° VEIN FABRIC: <u>Not Preserved</u>                                                                                                                                                                                                                                  | TYPE OF F.E.V. BRANCHING: <u>n.p</u>                 |                                               |                        |
| MARGINAL VENATION: <u>Not Preserved</u>                                                                                                                                                                                                                               | F.E.V.s TERMINATIONS: <u>Not Preserved</u>           |                                               |                        |
| AREOLATION: <u>Not Preserved</u>                                                                                                                                                                                                                                      | LEAF RANK: _____                                     |                                               |                        |
| <b>TOOTH FEATURES</b>                                                                                                                                                                                                                                                 |                                                      |                                               |                        |
| ORDERS OF TEETH: _____                                                                                                                                                                                                                                                | No TEETH/cm: _____                                   | TEETH GLANDULARITY: _____                     |                        |
| TOOTH SHAPE: _____                                                                                                                                                                                                                                                    | TOOTH SPACING: _____                                 |                                               |                        |
| PRINCIPAL VEIN: _____                                                                                                                                                                                                                                                 | SINUS SHAPE: _____                                   |                                               |                        |
| ACCESSORY VEIN COURSE: _____                                                                                                                                                                                                                                          | PRINCIPAL VEIN TERM.: _____                          |                                               |                        |
| <b>NOTES</b>                                                                                                                                                                                                                                                          |                                                      |                                               |                        |
| Specimens used to complete morphosheet: 1704-47A and 1704-47C                                                                                                                                                                                                         |                                                      |                                               |                        |

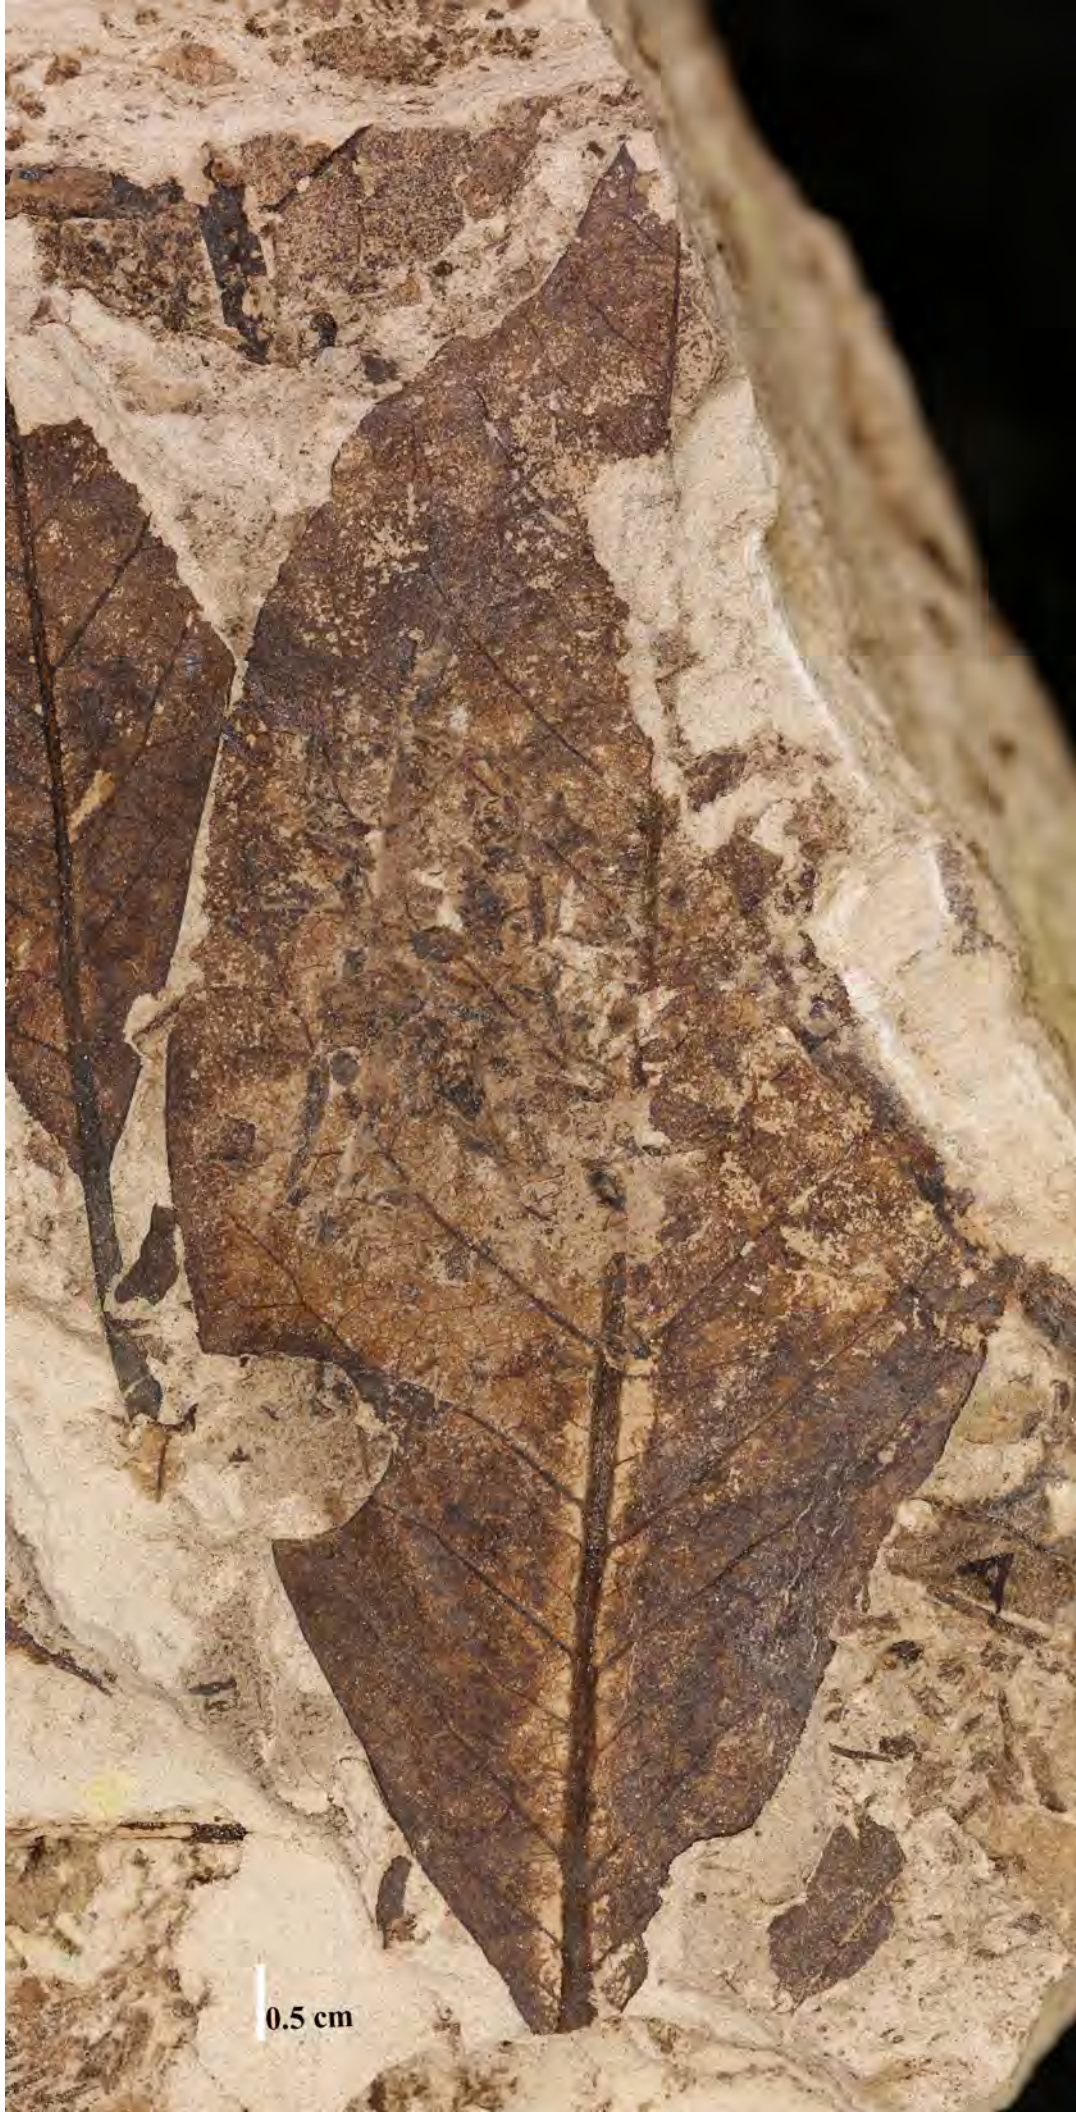

0.5 cm



| MORPHOTYPE                                                                                                                                                                                                           | NAME                                   |                             | <i>Macginitiea gracilis</i>                              |
|----------------------------------------------------------------------------------------------------------------------------------------------------------------------------------------------------------------------|----------------------------------------|-----------------------------|----------------------------------------------------------|
| <b>GENERAL</b>                                                                                                                                                                                                       | MAJOR GROUP                            | DIC                         | INFERED FAMILY <u>Platanaceae</u> ORGAN TYPE <u>Leaf</u> |
| EXEMPLAR LOC.                                                                                                                                                                                                        | <u>1703</u>                            | EXEMPLAR                    | <u>1703-9A, 1703-1</u> OTHERS LOC. _____                 |
| <b>DIAGNOSTIC FEATURES OF MORPHOTYPE</b>                                                                                                                                                                             |                                        |                             |                                                          |
| <u>Untoothered, palmate lobed leaf with symetrical base. This is the only palmate lobed leaf we have across stratigraphic levels. Agrophic veins are absent and the secondary vein spacing decreases proximally.</u> |                                        |                             |                                                          |
|                                                                                                                                                                                                                      |                                        |                             | MQI: _____                                               |
| <b>LEAF ATTACHMENT, ORGANIZATION, SIZE, SHAPE AND PETIOLE FEATURES</b>                                                                                                                                               |                                        |                             |                                                          |
| LEAF ATTACHMENT:                                                                                                                                                                                                     | <u>Petiolate</u>                       | LEAFLET ORGANIZATION:       | <u>Not Preserved</u>                                     |
| LEAF ARRANGEMENT:                                                                                                                                                                                                    | <u>Not Preserved</u>                   | LEAFLET ATTACHMENT:         | <u>np</u>                                                |
| LEAF ORGANIZATION:                                                                                                                                                                                                   | <u>Not Preserved</u>                   | PETIOLE ATTACHMENT.:        | <u>Not Preserved</u>                                     |
| BLADE SIZE:                                                                                                                                                                                                          | <u>Notophyll-Macrophyll</u>            | PETIOLE BASE:               | <u>Not Preserved</u>                                     |
| BLADE SHAPE:                                                                                                                                                                                                         | <u>Wide elliptic</u>                   | PETIOLE GLANDS.:            | <u>NP</u>                                                |
| BLADE RATIO L:W:                                                                                                                                                                                                     | <u>1:5-1</u>                           | PETIOLE X-SECTION:          | <u>NP</u>                                                |
| LOBATION:                                                                                                                                                                                                            | <u>Palmately lobed</u>                 | MARGIN TYPE                 | <u>Untoothered</u>                                       |
| BASE ASYMMETRY:                                                                                                                                                                                                      | <u>Symmetrical</u>                     | MEDIAL SYMMETRY:            | <u>Symmetrical</u>                                       |
| BASE SHAPE:                                                                                                                                                                                                          | <u>Concave</u>                         | APEX SHAPE:                 | <u>Not preserved</u>                                     |
| BASE ANGLE:                                                                                                                                                                                                          | <u>Obtuse</u>                          | APEX ANGLE:                 | <u>Not preserved</u>                                     |
|                                                                                                                                                                                                                      |                                        | Special Margin Features:    | <u>Not Preserved</u>                                     |
|                                                                                                                                                                                                                      |                                        | Terminal apex features:     | <u>Not Preserved</u>                                     |
| <b>PRIMARY &amp; SECONDARY VEIN FEATURES</b>                                                                                                                                                                         |                                        |                             |                                                          |
| PRIMARY VENATION:                                                                                                                                                                                                    | <u>Basal palinactinodromous</u>        | NAKED BASAL VEINS:          | <u>Absent</u>                                            |
| MAJOR 2° Framework:                                                                                                                                                                                                  | <u>Semicraspedodromous</u>             | N° BASAL VEINS:             | <u>3</u> Interior 2° <u>Present</u>                      |
| MAJOR 2° Attachment:                                                                                                                                                                                                 | <u>Decurrent</u>                       | MINOR-2° Course:            | _____                                                    |
| MAJOR 2° SPACING:                                                                                                                                                                                                    | <u>Gradually increasing proximally</u> | MAJOR 2° VEIN ANGLE:        | <u>Smoothly decreasing toward base</u>                   |
| INTER-2° proximal course:                                                                                                                                                                                            | <u>Perpendicular to midvein</u>        | AGROPHIC VEINS:             | <u>Absent</u>                                            |
| INTER-2° distal course:                                                                                                                                                                                              | <u>Perpendicular to major 2°</u>       | INTER-2° VEIN LENGTH:       | <u>&lt;50% of subjacent 2°</u>                           |
|                                                                                                                                                                                                                      |                                        | INTER-2° FREQUENCY:         | <u>&gt;1 per intercostal area</u>                        |
| <b>TERTIARY VEIN FEATURES</b>                                                                                                                                                                                        |                                        |                             |                                                          |
| INTERCOSTAL 3°:                                                                                                                                                                                                      | <u>Mixed opp/alt percurrent</u>        | PERIMARGINAL VEINS:         | <u>None</u>                                              |
| EPIMEDIAL 3°:                                                                                                                                                                                                        | <u>Opposite percurrent</u>             | INTER-3° ANGLE TO 1°:       | <u>Obtuse to midvein</u>                                 |
| ADMEDIAL COURSE:                                                                                                                                                                                                     | <u>Obtuse to midvein</u>               | EXTERIOR 3° COURSE:         | <u>Not Preserved</u>                                     |
| EXMEDIAL COURSE:                                                                                                                                                                                                     | <u>Basiflexed</u>                      | INTERCOSTAL 3° VARIABILITY: | <u>Consistent</u>                                        |
| <b>FOURTH &amp; HIGHER ORDER VEIN FEATURES</b>                                                                                                                                                                       |                                        |                             |                                                          |
| 4° VEIN FABRIC:                                                                                                                                                                                                      | <u>Altemate percurrent</u>             | VEINLETS -F/E/V/s:          | <u>Not Preserved</u>                                     |
| 5° VEIN FABRIC:                                                                                                                                                                                                      | <u>Regular reticulate</u>              | TYPE OF F.E.V. BRANCHING:   | <u>n.p</u>                                               |
| MARGINAL VENATION:                                                                                                                                                                                                   | <u>Not Preserved</u>                   | F.E.V.s TERMINATIONS:       | <u>Not Preserved</u>                                     |
| AREOLATION:                                                                                                                                                                                                          | <u>Moderately developed</u>            | LEAF RANK:                  | _____                                                    |
| <b>TOOTH FEATURES</b>                                                                                                                                                                                                |                                        |                             |                                                          |
| ORDERS OF TEETH:                                                                                                                                                                                                     | _____                                  | No TEETH/cm:                | _____                                                    |
| TOOTH SHAPE:                                                                                                                                                                                                         | _____                                  | TEETH GLANDULARITY:         | _____                                                    |
| PRINCIPAL VEIN:                                                                                                                                                                                                      | _____                                  | TOOTH SPACING:              | _____                                                    |
| ACCESSORY VEIN COURSE:                                                                                                                                                                                               | _____                                  | SINUS SHAPE:                | _____                                                    |
|                                                                                                                                                                                                                      |                                        | PRINCIPAL VEIN TERM.:       | _____                                                    |
| <b>NOTES</b>                                                                                                                                                                                                         |                                        |                             |                                                          |
| Specimens used to complete sheet are: 1703-9A and 1703-1                                                                                                                                                             |                                        |                             |                                                          |

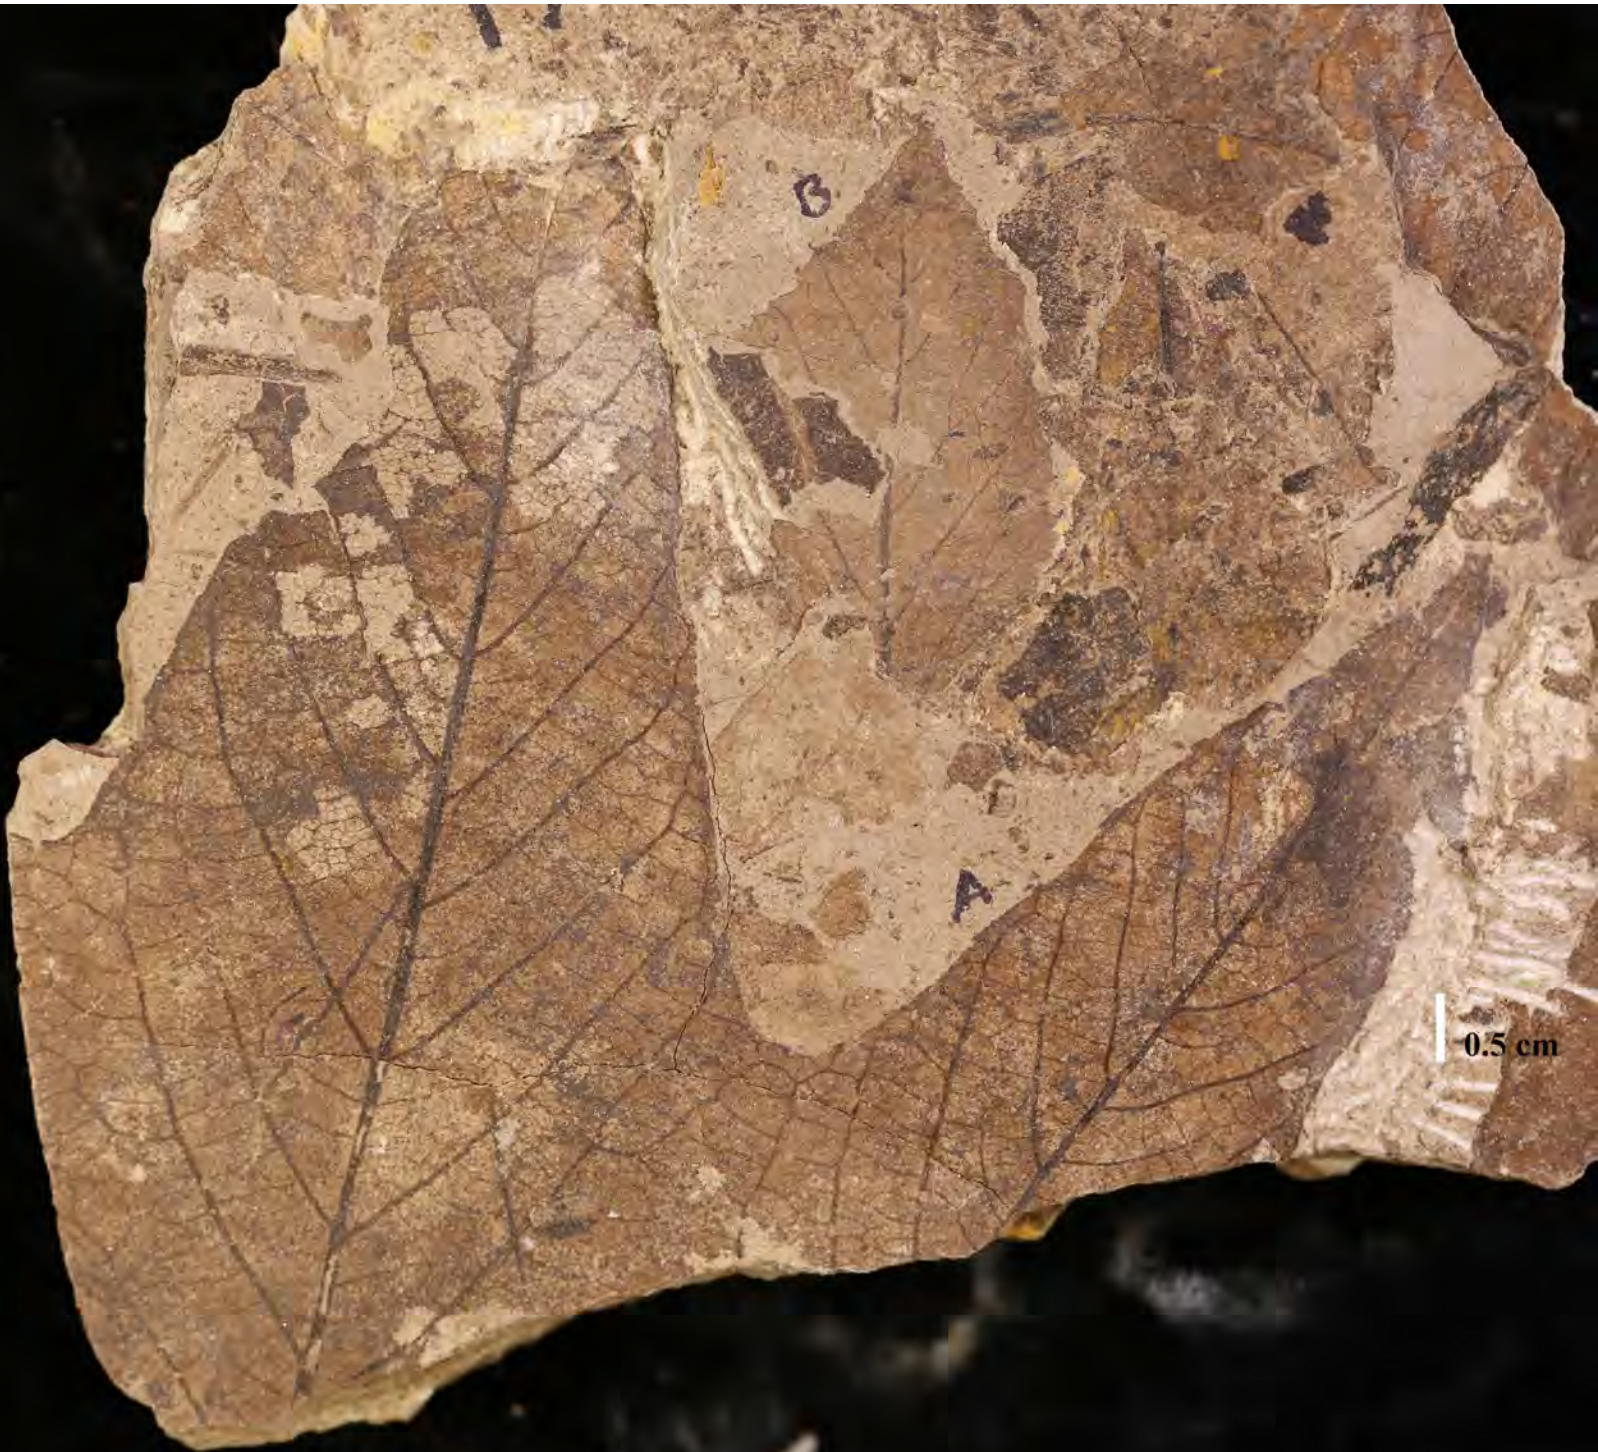



| MORPHOTYPE                                                                                               |                              | NAME                                   |                        |
|----------------------------------------------------------------------------------------------------------|------------------------------|----------------------------------------|------------------------|
|                                                                                                          |                              | <i>Platanites raynoldsii</i> (Palmate) |                        |
| <b>GENERAL</b>                                                                                           | MAJOR GROUP                  | DIC                                    | INFERED FAMILY         |
|                                                                                                          | LAS1701                      |                                        | Platanaceae            |
| EXEMPLAR LOC.                                                                                            | EXEMPLAR                     | OTHERS LOC.                            | ORGAN TYPE             |
|                                                                                                          | 1701-62B                     |                                        | Leaf                   |
| DIAGNOSTIC FEATURES OF MORPHOTYPE                                                                        |                              |                                        |                        |
| Serrate teeth that resemble hooks with non-specific glands.                                              |                              |                                        |                        |
| Teeth only have one order and approximately 2 teeth/cm.                                                  |                              |                                        |                        |
| When preserved, base is concave-convex. Palmate version of <i>Platanites</i> is suprabasal actinodromous |                              |                                        |                        |
| MQI: _____                                                                                               |                              |                                        |                        |
| <b>LEAF ATTACHMENT, ORGANIZATION, SIZE, SHAPE AND PETIOLE FEATURES</b>                                   |                              |                                        |                        |
| LEAF ATTACHMENT:                                                                                         | Petiolate                    | LEAFLET ORGANIZATION:                  | Not Preserved          |
| LEAF ARRANGEMENT:                                                                                        | Not Preserved                | LEAFLET ATTACHMENT:                    | np                     |
| LEAF ORGANIZATION:                                                                                       | Not Preserved                | PETIOLE ATTACHMENT.:                   | Not Preserved          |
| BLADE SIZE:                                                                                              | Microphyll-Mesophyll         | PETIOLE BASE:                          | Not Preserved          |
| BLADE SHAPE:                                                                                             | Ovate                        | PETIOLE GLANDS.:                       | Not Preserved          |
| BLADE RATIO L:W:                                                                                         | 2:1                          | PETIOLE X-SECTION:                     | Not Preserved          |
| LOBATION:                                                                                                | Unlobed                      | MARGIN TYPE                            | Serrate                |
| BASE ASYMMETRY:                                                                                          | Symmetrical                  | MEDIAL SYMMETRY:                       | Symmetrical            |
| BASE SHAPE:                                                                                              | Concave-convex               | APEX SHAPE:                            | Acuminate              |
| BASE ANGLE:                                                                                              | Acute                        | APEX ANGLE:                            | Acute                  |
|                                                                                                          |                              | Special Margin Features:               | Not Preserved          |
|                                                                                                          |                              | Terminal apex features:                | Not Preserved          |
| <b>PRIMARY &amp; SECONDARY VEIN FEATURES</b>                                                             |                              |                                        |                        |
| PRIMARY VENATION:                                                                                        | Suprabasal actinodromous     | NAKED BASAL VEINS:                     | Absent                 |
| MAJOR 2° Framework:                                                                                      | Craspedodromous              | N° BASAL VEINS:                        | 1 Interior 2° Absent   |
| MAJOR 2° Attachment:                                                                                     | Decurrent                    | MINOR-2° Course:                       | Craspedodromous        |
| MAJOR 2° SPACING:                                                                                        | Regular                      | MAJOR 2° VEIN ANGLE:                   | Inconsistent           |
|                                                                                                          |                              | AGROPHIC VEINS:                        | Simple                 |
| INTER-2° proximal course:                                                                                |                              | INTER-2° VEIN LENGTH:                  |                        |
| INTER-2° distal course:                                                                                  |                              | INTER-2° FREQUENCY:                    |                        |
| <b>TERTIARY VEIN FEATURES</b>                                                                            |                              |                                        |                        |
| INTERCOSTAL 3°:                                                                                          | Opposite percurrent - convex | PERIMARGINAL VEINS:                    | None                   |
| EPIMEDIAL 3°:                                                                                            | Opposite percurrent          | INTER-3° ANGLE TO 1°:                  | Obtuse to midvein      |
| ADMEDIAL COURSE:                                                                                         | Perpendicular to midvein     | EXTERIOR 3° COURSE:                    | Looped                 |
| EXMEDIAL COURSE:                                                                                         | Basiflexed                   | INTERCOSTAL 3° VARIABILITY:            | Consistent             |
| <b>FOURTH &amp; HIGHER ORDER VEIN FEATURES</b>                                                           |                              |                                        |                        |
| 4° VEIN FABRIC:                                                                                          | Mixed percurrent             | VEINLETS -F/E/V/s:                     | Not Preserved          |
| 5° VEIN FABRIC:                                                                                          | Irregular reticulate         | TYPE OF F.E.V. BRANCHING:              | n.p                    |
| MARGINAL VENATION:                                                                                       | Not Preserved                | F.E.V.s TERMINATIONS:                  | Not Preserved          |
| AREOLATION:                                                                                              | Moderately developed         | LEAF RANK:                             |                        |
| <b>TOOTH FEATURES</b>                                                                                    |                              |                                        |                        |
| ORDERS OF TEETH:                                                                                         | 1                            | No TEETH/cm:                           | 2                      |
| TOOTH SHAPE:                                                                                             | cc/rt                        | TEETH GLANDULARITY:                    | Non-specific glandular |
| PRINCIPAL VEIN:                                                                                          | Present                      | TOOTH SPACING:                         | Regular                |
|                                                                                                          |                              | SINUS SHAPE:                           | Rounded                |
| ACCESSORY VEIN COURSE:                                                                                   | Straight or concave          | PRINCIPAL VEIN TERM.:                  | Marginal, at apex      |
| <b>NOTES</b>                                                                                             |                              |                                        |                        |
| Specimens used to complete morphopheet are: 1701-62B, 1701-50                                            |                              |                                        |                        |



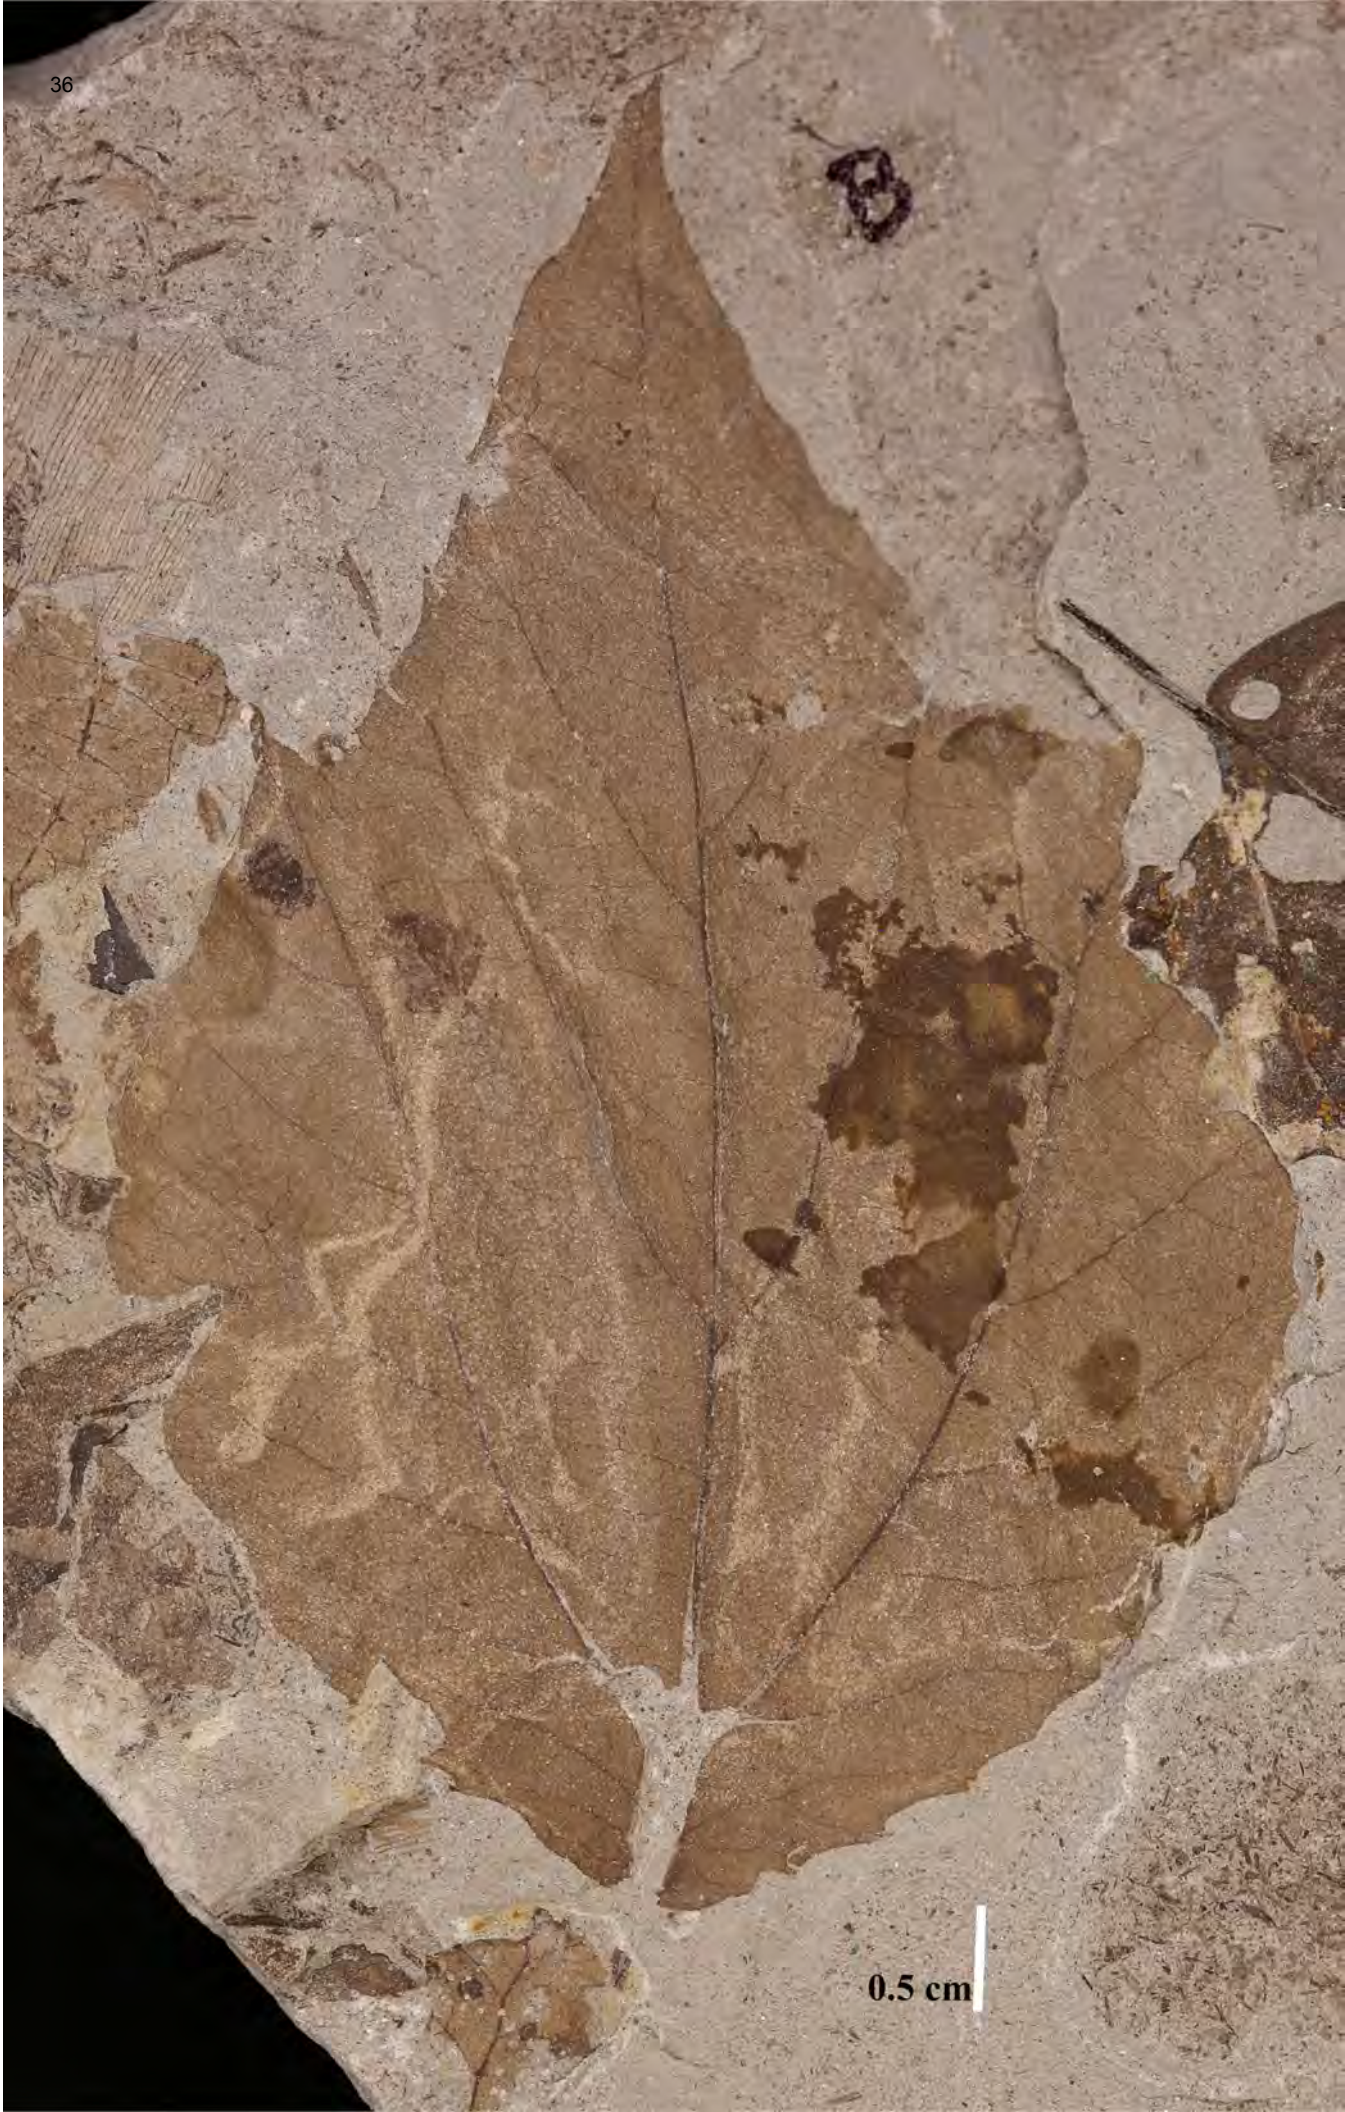

0.5 cm



| MORPHOTYPE                                                                            | NAME                         |                             | <i>Platanites raynoldsii</i> (Pinnate)                      |                          |                        |      |
|---------------------------------------------------------------------------------------|------------------------------|-----------------------------|-------------------------------------------------------------|--------------------------|------------------------|------|
| <b>GENERAL</b>                                                                        | MAJOR GROUP                  | DIC                         | INFERED FAMILY                                              | Platanaceae              | ORGAN TYPE             | Leaf |
| EXEMPLAR LOC.                                                                         | LAS1706                      | EXEMPLAR                    | 1706-40C                                                    | OTHERS LOC.              | LAS1701                |      |
| DIAGNOSTIC FEATURES OF MORPHOTYPE                                                     |                              |                             | Serrate teeth that resemble hooks with non-specific glands. |                          |                        |      |
| Teeth only have one order and approximately 2 teeth/cm. When base is preserved, it is |                              |                             | concave-convex.                                             |                          |                        |      |
|                                                                                       |                              |                             | MQI: _____                                                  |                          |                        |      |
| <b>LEAF ATTACHMENT, ORGANIZATION, SIZE, SHAPE AND PETIOLE FEATURES</b>                |                              |                             |                                                             |                          |                        |      |
| LEAF ATTACHMENT:                                                                      | Petiolate                    | LEAFLET ORGANIZATION:       | Not Preserved                                               |                          |                        |      |
| LEAF ARRANGEMENT:                                                                     | Not Preserved                | LEAFLET ATTACHMENT:         | np                                                          |                          |                        |      |
| LEAF ORGANIZATION:                                                                    | Not Preserved                | PETIOLE ATTACHMENT.:        | Not Preserved                                               |                          |                        |      |
| BLADE SIZE:                                                                           | Microphyl                    | PETIOLE BASE:               | Not Preserved                                               |                          |                        |      |
| BLADE SHAPE:                                                                          | Ovate                        | PETIOLE GLANDS.:            | Not Preserved                                               |                          |                        |      |
| BLADE RATIO L:W:                                                                      | 2:1                          | PETIOLE X-SECTION:          | Not Preserved                                               |                          |                        |      |
| LOBATION:                                                                             | Unlobed                      | MARGIN TYPE                 | Serrate                                                     |                          |                        |      |
| BASE ASYMMETRY:                                                                       | Symmetrical                  | MEDIAL SYMMETRY:            | Symmetrical                                                 |                          |                        |      |
| BASE SHAPE:                                                                           | Concave-convex               | APEX SHAPE:                 | Acuminate                                                   | Special Margin Features: | Not Preserved          |      |
| BASE ANGLE:                                                                           | Acute                        | APEX ANGLE:                 | Acute                                                       | Terminal apex features:  | Not Preserved          |      |
| <b>PRIMARY &amp; SECONDARY VEIN FEATURES</b>                                          |                              |                             |                                                             |                          |                        |      |
| PRIMARY VENATION:                                                                     | Pinnate                      | NAKED BASAL VEINS:          | Absent                                                      |                          |                        |      |
| MAJOR 2° Framework:                                                                   | Craspedodromous              | N° BASAL VEINS:             | 1                                                           | Interior 2°:             | Absent                 |      |
| MAJOR 2° Attachment:                                                                  | Decurrent                    | MINOR-2° Course:            |                                                             |                          |                        |      |
| MAJOR 2° SPACING:                                                                     | Regular                      | MAJOR 2° VEIN ANGLE:        | Inconsistent                                                |                          |                        |      |
| INTER-2° proximal course:                                                             |                              | AGROPHIC VEINS:             | Absent                                                      |                          |                        |      |
| INTER-2° distal course:                                                               |                              | INTER-2° VEIN LENGTH:       |                                                             |                          |                        |      |
|                                                                                       |                              | INTER-2° FREQUENCY:         |                                                             |                          |                        |      |
| <b>TERTIARY VEIN FEATURES</b>                                                         |                              |                             |                                                             |                          |                        |      |
| INTERCOSTAL 3°:                                                                       | Opposite percurrent - convex | PERIMARGINAL VEINS:         | None                                                        |                          |                        |      |
| EPIMEDIAL 3°:                                                                         | Opposite percurrent          | INTER-3° ANGLE TO 1°:       | Obtuse to midvein                                           |                          |                        |      |
| ADMEDIAL COURSE:                                                                      | Perpendicular to midvein     | EXTERIOR 3° COURSE:         | Looped                                                      |                          |                        |      |
| EXMEDIAL COURSE:                                                                      | Basiflexed                   | INTERCOSTAL 3° VARIABILITY: | Consistent                                                  |                          |                        |      |
| <b>FOURTH &amp; HIGHER ORDER VEIN FEATURES</b>                                        |                              |                             |                                                             |                          |                        |      |
| 4° VEIN FABRIC:                                                                       | Mixed percurrent             | VEINLETS -F/E/V/s:          | Not Preserved                                               |                          |                        |      |
| 5° VEIN FABRIC:                                                                       | Irregular reticulate         | TYPE OF F.E.V. BRANCHING:   | n.p                                                         |                          |                        |      |
| MARGINAL VENATION:                                                                    | Not Preserved                | F.E.V.s TERMINATIONS:       | Not Preserved                                               |                          |                        |      |
| AREOLATION:                                                                           | Moderately developed         | LEAF RANK:                  |                                                             |                          |                        |      |
| <b>TOOTH FEATURES</b>                                                                 |                              |                             |                                                             |                          |                        |      |
| ORDERS OF TEETH:                                                                      | 1                            | No TEETH/cm:                | 2                                                           | TEETH GLANDULARITY:      | Non-specific glandular |      |
| TOOTH SHAPE:                                                                          | cc/rt                        | TOOTH SPACING:              | Regular                                                     |                          |                        |      |
| PRINCIPAL VEIN:                                                                       | Present                      | SINUS SHAPE:                | Rounded                                                     |                          |                        |      |
| ACCESSORY VEIN COURSE:                                                                | Straight or concave          |                             | PRINCIPAL VEIN TERM.:                                       | Marginal, at apex        |                        |      |
| <b>NOTES</b>                                                                          |                              |                             |                                                             |                          |                        |      |
| Specimens used to complete morphopheet is: 1706-40C                                   |                              |                             |                                                             |                          |                        |      |



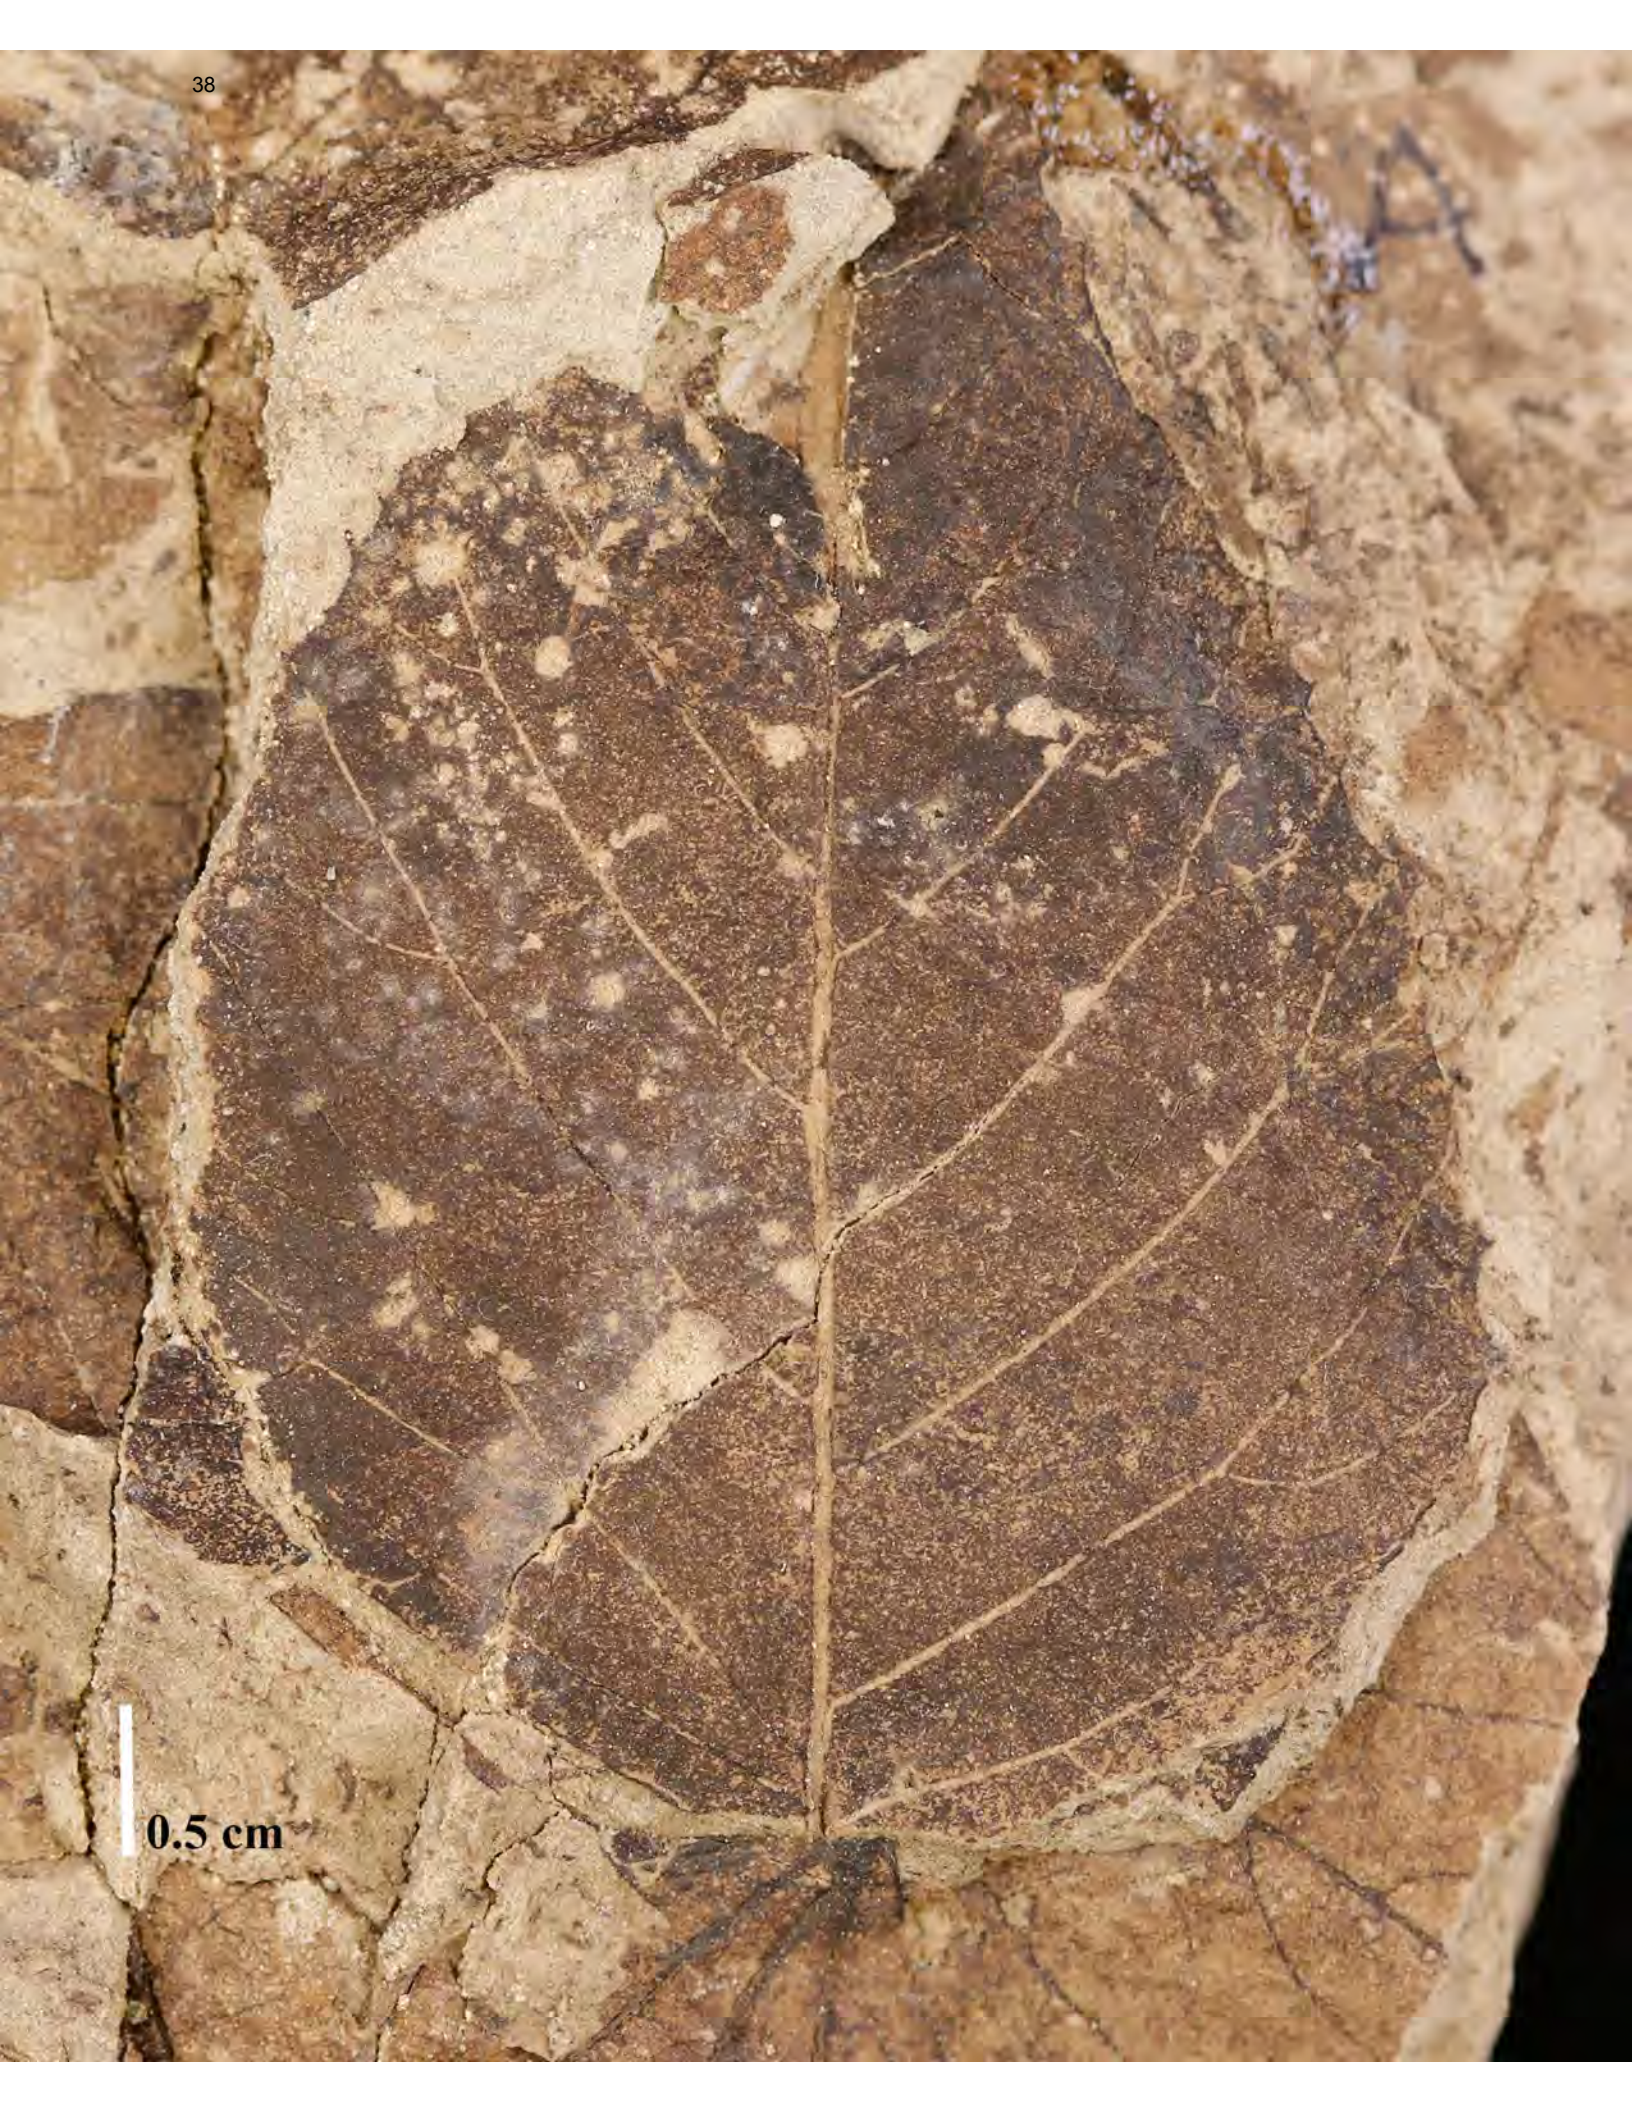

0.5 cm



| MORPHOTYPE                                                                                                                                                    |                                                             |                             |                                   | NAME                     | <i>Trochodendroides genatrix</i> |
|---------------------------------------------------------------------------------------------------------------------------------------------------------------|-------------------------------------------------------------|-----------------------------|-----------------------------------|--------------------------|----------------------------------|
| <b>GENERAL</b>                                                                                                                                                | MAJOR GROUP                                                 | INFERED FAMILY              | <u>Trochodendraceae</u>           | ORGAN TYPE               | <u>Leaf</u>                      |
| EXEMPLAR LOC.                                                                                                                                                 | <u>HB1706</u>                                               | EXEMPLAR                    | <u>1706-10</u>                    | OTHERS LOC.              |                                  |
| <b>DIAGNOSTIC FEATURES OF MORPHOTYPE</b>                                                                                                                      |                                                             |                             |                                   |                          |                                  |
| <u>Rounded teeth starting approximately half-way up the leaf margin. Teeth are regularly spaced and consistent. Shape can vary but all leaves are obovate</u> |                                                             |                             |                                   |                          |                                  |
|                                                                                                                                                               |                                                             |                             |                                   |                          | MQI: _____                       |
| <b>LEAF ATTACHMENT, ORGANIZATION, SIZE, SHAPE AND PETIOLE FEATURES</b>                                                                                        |                                                             |                             |                                   |                          |                                  |
| LEAF ATTACHMENT:                                                                                                                                              | <u>Petiolate</u>                                            | LEAFLET ORGANIZATION:       | <u>Not Preserved</u>              |                          |                                  |
| LEAF ARRANGEMENT:                                                                                                                                             | <u>Not Preserved</u>                                        | LEAFLET ATTACHMENT:         | <u>np</u>                         |                          |                                  |
| LEAF ORGANIZATION:                                                                                                                                            | <u>Not Preserved</u>                                        | PETIOLE ATTACHMENT.:        | <u>Not Preserved</u>              |                          |                                  |
| BLADE SIZE:                                                                                                                                                   | <u>Nanophyll-Notophyll</u>                                  | PETIOLE BASE:               | <u>Not Preserved</u>              |                          |                                  |
| BLADE SHAPE:                                                                                                                                                  | <u>Obovate</u>                                              | PETIOLE GLANDS.:            | <u>Not Preserved</u>              |                          |                                  |
| BLADE RATIO L:W:                                                                                                                                              | <u>1:1</u>                                                  | PETIOLE X-SECTION:          | <u>Not Preserved</u>              |                          |                                  |
| LOBATION:                                                                                                                                                     | <u>Unlobed</u>                                              | MARGIN TYPE                 | <u>Crenate</u>                    |                          |                                  |
| BASE ASYMMETRY:                                                                                                                                               | <u>Symmetrical</u>                                          | MEDIAL SYMMETRY:            | <u>Symmetrical</u>                |                          |                                  |
| BASE SHAPE:                                                                                                                                                   | <u>Convex</u>                                               | APEX SHAPE:                 | <u>Straight</u>                   | Special Margin Features: | <u>Not Preserved</u>             |
| BASE ANGLE:                                                                                                                                                   | <u>Acute</u>                                                | APEX ANGLE:                 | <u>Obtuse</u>                     | Terminal apex features:  | <u>None</u>                      |
| <b>PRIMARY &amp; SECONDARY VEIN FEATURES</b>                                                                                                                  |                                                             |                             |                                   |                          |                                  |
| PRIMARY VENATION:                                                                                                                                             | <u>Basal actinodromous</u>                                  | NAKED BASAL VEINS:          | <u>Absent</u>                     |                          |                                  |
| MAJOR 2° Framework:                                                                                                                                           | <u>Cladodromous</u>                                         | N° BASAL VEINS:             | <u>3</u>                          | Interior 2°:             | <u>Present</u>                   |
| MAJOR 2° Attachment:                                                                                                                                          | <u>Decurrent</u>                                            | MINOR-2° Course:            | <u>Not Preserved</u>              |                          |                                  |
| MAJOR 2° SPACING:                                                                                                                                             | <u>Regular</u>                                              | MAJOR 2° VEIN ANGLE:        | <u>Uniform</u>                    |                          |                                  |
| INTER-2° proximal course:                                                                                                                                     | <u>Not Preserved</u>                                        | AGROPHIC VEINS:             | <u>Absent</u>                     |                          |                                  |
| INTER-2° distal course:                                                                                                                                       | <u>Basiflexed, not perpendicular to subjacent secondary</u> | INTER-2° VEIN LENGTH:       | <u>&lt;50% of subjacent 2°</u>    |                          |                                  |
|                                                                                                                                                               |                                                             | INTER-2° FREQUENCY:         | <u>&gt;1 per intercostal area</u> |                          |                                  |
| <b>TERTIARY VEIN FEATURES</b>                                                                                                                                 |                                                             |                             |                                   |                          |                                  |
| INTERCOSTAL 3°:                                                                                                                                               | <u>Opposite percurrent - straight</u>                       | PERIMARGINAL VEINS:         | <u>Not Preserved</u>              |                          |                                  |
| EPIMEDIAL 3°:                                                                                                                                                 | <u>Opposite percurrent</u>                                  | INTER-3° ANGLE TO 1°:       | <u>Acute to midvein</u>           |                          |                                  |
| ADMEDIAL COURSE:                                                                                                                                              | <u>Acute to midvein</u>                                     | EXTERIOR 3° COURSE:         | <u>Variable</u>                   |                          |                                  |
| EXMEDIAL COURSE:                                                                                                                                              | <u>Basiflexed</u>                                           | INTERCOSTAL 3° VARIABILITY: | <u>Consistent</u>                 |                          |                                  |
| <b>FOURTH &amp; HIGHER ORDER VEIN FEATURES</b>                                                                                                                |                                                             |                             |                                   |                          |                                  |
| 4° VEIN FABRIC:                                                                                                                                               | <u>Opposite percurrent</u>                                  | VEINLETS -F/E/V/s:          | <u>Not Preserved</u>              |                          |                                  |
| 5° VEIN FABRIC:                                                                                                                                               | <u>Irregular reticulate</u>                                 | TYPE OF F.E.V. BRANCHING:   | <u>n.p</u>                        |                          |                                  |
| MARGINAL VENATION:                                                                                                                                            | <u>Not Preserved</u>                                        | F.E.V.s TERMINATIONS:       | <u>Not Preserved</u>              |                          |                                  |
| AREOLATION:                                                                                                                                                   | <u>Moderately developed</u>                                 | LEAF RANK:                  |                                   |                          |                                  |
| <b>TOOTH FEATURES</b>                                                                                                                                         |                                                             |                             |                                   |                          |                                  |
| ORDERS OF TEETH:                                                                                                                                              | <u>1</u>                                                    | No TEETH/cm:                | <u>4</u>                          | TEETH GLANDULARITY:      | <u>None</u>                      |
| TOOTH SHAPE:                                                                                                                                                  | <u>r/cv</u>                                                 | TOOTH SPACING:              | <u>Regular</u>                    |                          |                                  |
| PRINCIPAL VEIN:                                                                                                                                               | <u>Present</u>                                              | SINUS SHAPE:                | <u>variable</u>                   |                          |                                  |
| ACCESSORY VEIN COURSE:                                                                                                                                        | <u>Looped</u>                                               | PRINCIPAL VEIN TERM.:       | <u>Marginal, at apex</u>          |                          |                                  |
| <b>NOTES</b>                                                                                                                                                  |                                                             |                             |                                   |                          |                                  |
| Morphosheet completed using specimens: 1706-10, 1701-41                                                                                                       |                                                             |                             |                                   |                          |                                  |

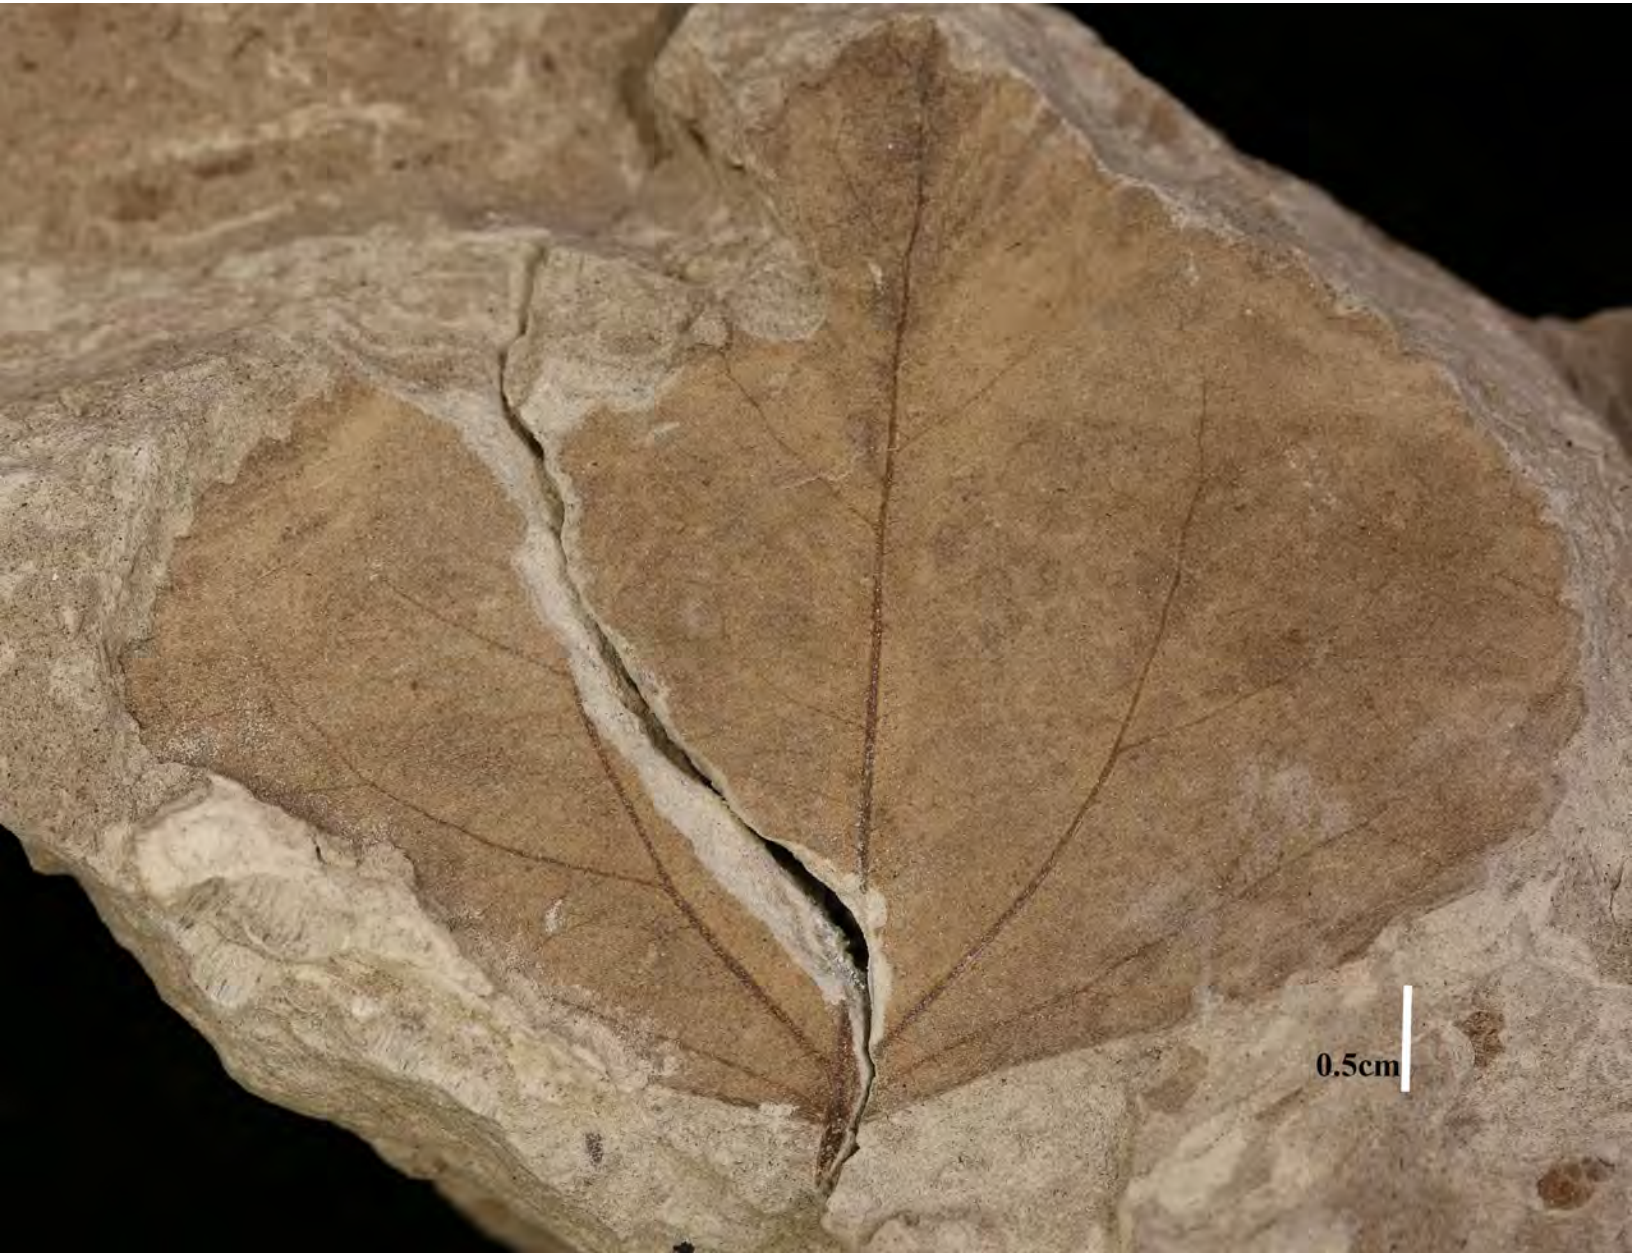



| MORPHOTYPE                                                             |                       |                       |                                 | NAME                     | <i>Zizyphoides flabella</i>                                                                                                                                                                                                                                                                        |
|------------------------------------------------------------------------|-----------------------|-----------------------|---------------------------------|--------------------------|----------------------------------------------------------------------------------------------------------------------------------------------------------------------------------------------------------------------------------------------------------------------------------------------------|
| <b>GENERAL</b>                                                         | MAJOR GROUP           | DIC                   | INFERED FAMILY                  | ORGAN TYPE               | Leaf                                                                                                                                                                                                                                                                                               |
| EXEMPLAR LOC.                                                          | 1701                  | EXEMPLAR              | 1701-84, 1706-36B               | OTHERS LOC.              |                                                                                                                                                                                                                                                                                                    |
| DIAGNOSTIC FEATURES OF MORPHOTYPE                                      |                       |                       |                                 |                          | Similar overall shape to <i>Trochodendroides</i> but without teeth. In lue of teeth, <i>Zizyphoides</i> has "lobes" within the top 1/3 of the leaf, similar to <i>Platanties</i> (Palmate). 2° framework is simple brochidodromous and cladodromous. Lastly, <i>Zizyphoides</i> has 5 basal veins. |
|                                                                        |                       |                       |                                 |                          | MQI: _____                                                                                                                                                                                                                                                                                         |
| <b>LEAF ATTACHMENT, ORGANIZATION, SIZE, SHAPE AND PETIOLE FEATURES</b> |                       |                       |                                 |                          |                                                                                                                                                                                                                                                                                                    |
| LEAF ATTACHMENT:                                                       | Petiolate             | LEAFLET ORGANIZATION: | Not Preserved                   |                          |                                                                                                                                                                                                                                                                                                    |
| LEAF ARRANGEMENT:                                                      | Not Preserved         | LEAFLET ATTACHMENT:   | np                              |                          |                                                                                                                                                                                                                                                                                                    |
| LEAF ORGANIZATION:                                                     | Not Preserved         | PETIOLE ATTACHMENT.:  | Not Preserved                   |                          |                                                                                                                                                                                                                                                                                                    |
| BLADE SIZE:                                                            | Microphyll            | PETIOLE BASE:         | Not Preserved                   |                          |                                                                                                                                                                                                                                                                                                    |
| BLADE SHAPE:                                                           | Elliptic              | PETIOLE GLANDS.:      | Not Preserved                   |                          |                                                                                                                                                                                                                                                                                                    |
| BLADE RATIO L:W:                                                       | 1:1                   | PETIOLE X-SECTION:    | Not Preserved                   |                          |                                                                                                                                                                                                                                                                                                    |
| LOBATION:                                                              | Unlobed               | MARGIN TYPE           | Untoothed                       |                          |                                                                                                                                                                                                                                                                                                    |
| BASE ASYMMETRY:                                                        | Symmetrical           | MEDIAL SYMMETRY:      | Symmetrical                     |                          |                                                                                                                                                                                                                                                                                                    |
| BASE SHAPE:                                                            | Concave               | APEX SHAPE:           | Straight                        | Special Margin Features: | Not Preserved                                                                                                                                                                                                                                                                                      |
| BASE ANGLE:                                                            | Obtuse                | APEX ANGLE:           | Wide obtuse                     | Terminal apex features:  | None                                                                                                                                                                                                                                                                                               |
| <b>PRIMARY &amp; SECONDARY VEIN FEATURES</b>                           |                       |                       |                                 |                          |                                                                                                                                                                                                                                                                                                    |
| PRIMARY VENATION:                                                      | Basal actinodromous   |                       | NAKED BASAL VEINS:              | Absent                   |                                                                                                                                                                                                                                                                                                    |
| MAJOR 2° Framework:                                                    | Mixed framework       |                       | N° BASAL VEINS:                 | 5                        | Interior 2°: Absent                                                                                                                                                                                                                                                                                |
| MAJOR 2° Attachment:                                                   | Decurrent             | MAJOR 2° VEIN ANGLE:  | Smoothly decreasing toward base |                          |                                                                                                                                                                                                                                                                                                    |
| MAJOR 2° SPACING:                                                      | Decreasing proximally |                       | AGROPHIC VEINS:                 | Absent                   |                                                                                                                                                                                                                                                                                                    |
| INTER-2° proximal course:                                              |                       |                       | INTER-2° VEIN LENGTH:           |                          |                                                                                                                                                                                                                                                                                                    |
| INTER-2° distal course:                                                |                       |                       | INTER-2° FREQUENCY:             |                          |                                                                                                                                                                                                                                                                                                    |
| <b>TERTIARY VEIN FEATURES</b>                                          |                       |                       |                                 |                          |                                                                                                                                                                                                                                                                                                    |
| INTERCOSTAL 3°:                                                        | Not Preserved         |                       | PERIMARGINAL VEINS:             | Not Preserved            |                                                                                                                                                                                                                                                                                                    |
| EPIMEDIAL 3°:                                                          | Not preserved         |                       | INTER-3° ANGLE TO 1°:           | Not Preserved            |                                                                                                                                                                                                                                                                                                    |
| ADMEDIAL COURSE:                                                       | Not Preserved         |                       | EXTERIOR 3° COURSE:             | Not Preserved            |                                                                                                                                                                                                                                                                                                    |
| EXMEDIAL COURSE:                                                       | Not Preserved         |                       | INTERCOSTAL 3° VARIABILITY:     | Not Preserved            |                                                                                                                                                                                                                                                                                                    |
| <b>FOURTH &amp; HIGHER ORDER VEIN FEATURES</b>                         |                       |                       |                                 |                          |                                                                                                                                                                                                                                                                                                    |
| 4° VEIN FABRIC:                                                        | Not Preserved         |                       | VEINLETS -F/E/V/s:              | Not Preserved            |                                                                                                                                                                                                                                                                                                    |
| 5° VEIN FABRIC:                                                        | Not Preserved         |                       | TYPE OF F.E.V. BRANCHING:       | n.p                      |                                                                                                                                                                                                                                                                                                    |
| MARGINAL VENATION:                                                     | Not Preserved         |                       | F.E.V.s TERMINATIONS:           | Not Preserved            |                                                                                                                                                                                                                                                                                                    |
| AREOLATION:                                                            | Not Preserved         |                       | LEAF RANK:                      |                          |                                                                                                                                                                                                                                                                                                    |
| <b>TOOTH FEATURES</b>                                                  |                       |                       |                                 |                          |                                                                                                                                                                                                                                                                                                    |
| ORDERS OF TEETH:                                                       |                       |                       | No TEETH/cm:                    |                          |                                                                                                                                                                                                                                                                                                    |
| TOOTH SHAPE:                                                           |                       |                       | TEETH GLANDULARITY:             |                          |                                                                                                                                                                                                                                                                                                    |
| PRINCIPAL VEIN:                                                        |                       |                       | TOOTH SPACING:                  |                          |                                                                                                                                                                                                                                                                                                    |
| ACCESSORY VEIN COURSE:                                                 |                       |                       | SINUS SHAPE:                    |                          |                                                                                                                                                                                                                                                                                                    |
|                                                                        |                       |                       | PRINCIPAL VEIN TERM.:           |                          |                                                                                                                                                                                                                                                                                                    |
| <b>NOTES</b>                                                           |                       |                       |                                 |                          |                                                                                                                                                                                                                                                                                                    |
| Specimens used to complete morphosheet: 1701-84, 1706-36B              |                       |                       |                                 |                          |                                                                                                                                                                                                                                                                                                    |

42

0.5 cm



Supplement: AppendixA4_reduced.pdf [file AppendixA4_reduced.pdf]
